# Supplementary material for: Chiral phosphoric acid-catalyzed direct asymmetric mannich reaction of cyclicC-acylimines with simple ketones: facile access to C2-quaternary indolin-3-ones
Source: Royal Society of Chemistry journal article supplement (doi:10.1039/c8cc05125a), 2018-01-01
Supplement: c8cc05125a1.pdf [file c8cc05125a1.pdf]

## Electronic Supplementary Information (ESI)

### Chiral Phosphoric Acid-Catalyzed Direct Asymmetric Mannich Reaction of Cyclic C-Acylimines with Simple Ketones: Facile Access to C2-Quaternary Indolin-3-ones

Jin-Shan Li, Yong-Jie Liu, Shen Li, Jun-An Ma\*

*Department of Chemistry, Tianjin Key Laboratory of Molecular Optoelectronic  
Sciences, and Tianjin Collaborative Innovation Center of Chemical Science &  
Engineering, Tianjin University*

*Tianjin 300072, P. R. of China*

*E-mail: majun\_an68@tju.edu.cn*

### Contents

|                                                                                                                                              |    |
|----------------------------------------------------------------------------------------------------------------------------------------------|----|
| General information.....                                                                                                                     | 2  |
| General procedure for synthesis of substrates <b>1</b> and <b>5</b> .....                                                                    | 2  |
| General procedure for the reaction of 2-aryl-3 <i>H</i> -indol-3-ones <b>1</b> with simple ketones<br><b>2</b> .....                         | 4  |
| General procedure for the reaction of 1'-tosyl-1' <i>H</i> ,3 <i>H</i> -[2,3'-biindol]-3-ones <b>5</b> with<br>simple ketones <b>2</b> ..... | 14 |
| Scaled-up synthesis and further transformations.....                                                                                         | 21 |
| Control experiment.....                                                                                                                      | 24 |
| Reference.....                                                                                                                               | 25 |
| NMR spectra of the related compounds.....                                                                                                    | 26 |
| HPLC charts of the related compounds.....                                                                                                    | 68 |
| X-Ray crystallographic data.....                                                                                                             | 91 |

## General information

$^1\text{H}$ ,  $^{13}\text{C}$  and  $^{19}\text{F}$  were recorded on Bruker AV 400 MHz instrument at 400 MHz ( $^1\text{H}$  NMR), 100 MHz ( $^{13}\text{C}$  NMR), as well as 376 MHz ( $^{19}\text{F}$  NMR), or Bruker AV 600 MHz instrument at 600 MHz ( $^1\text{H}$  NMR), 150 MHz ( $^{13}\text{C}$  NMR), as well as 565 MHz ( $^{19}\text{F}$  NMR). Chemical shifts were reported in ppm down field from internal  $\text{Me}_4\text{Si}$  and external  $\text{CCl}_3\text{F}$ , respectively. Multiplicity was indicated as follows: s (singlet), d (doublet), t (triplet), q (quartet), m (multiplet), dd (doublet of doublet), br (broad). Coupling constants were reported in Hertz (Hz). MS were recorded on a VG ZABHS spectrometer with the ESI resource. High resolution mass spectrometry (HRMS) spectra were obtained on a Bruker miorOTOF-QII instrument. Optical rotations were determined using an Autopol IV-T. IR spectra were recorded on an AVATAR 360 FT-IR spectrometer. HPLC analyses were carried out on a HewlettPackard Model HP 1200 instrument. X-ray structural analysis was conducted on the Bruker APEX-II CCD instrument.

**Materials:** Tetrahydrofuran (THF), diethyl ether, and toluene were distilled from sodium/benzophenone prior to use;  $\text{CH}_2\text{Cl}_2$  was distilled from  $\text{CaH}_2$ ; All purchased reagents were used without further purification. Analytical thin layer chromatography was performed on 0.20 mm Qingdao Haiyang silica gel plates. Silica gel (200–300 mesh) (from Qingdao Haiyang Chem. Company, Ltd.) was used for flash chromatography. 2-aryl substituted 3*H*-indol-3-ones **1**,<sup>1</sup> 1'*H*,3*H*-[2,3'-biindol]-3-ones,<sup>2</sup> 1'-tosyl-1'*H*,3*H*-[2,3'-biindol]-3-one **5a**,<sup>3</sup> 2-aryl indoles,<sup>4</sup> and chiral phosphoric acids **4a–j**<sup>5</sup> were prepared according to the reported procedures.

## General procedure for synthesis of 2-aryl substituted 3*H*-indol-3-ones **1**<sup>1</sup>

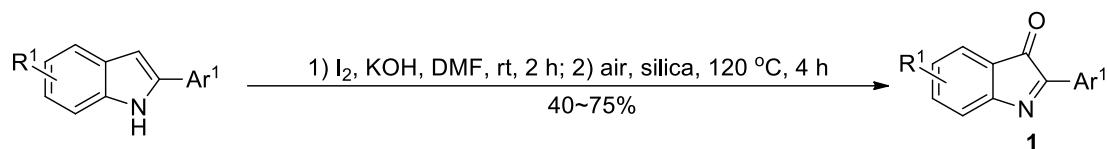

A solution of  $\text{I}_2$  (4.38 g, 17.2 mmol) in DMF (30 mL) was dropped into a solution of 2-aryl indoles (17.1 mmol) and KOH (2.39 g, 42.7 mmol) in DMF (30 mL) at rt and stirred for 2 h. The mixture was then purged with air, silica (7.10 g) was added and the mixture heated to 120 °C for 4 h. Upon cooling, water (200 mL) was added and the mixture extracted with ethyl acetate (3 × 100 mL). The organic extracts were combined, dried ( $\text{Na}_2\text{SO}_4$ ), filtered and concentrated in vacuo. Purification by flash chromatography on silica gel eluting with petroleum ether/ethyl acetate (5:1) gave the 2-aryl substituted 3*H*-indol-3-ones **1** as red solids (40~75%).

## *N*-tosylation of 1'*H*,3*H*-[2,3'-biindol]-3-ones for synthesis of substrates **5**

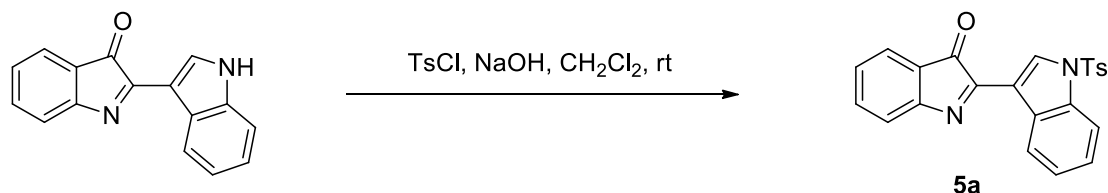

A mixture of 246.3 mg (1.0 mmol) of 1'*H*,3*H*-[2,3'-biindol]-3-one, 10 mL of  $\text{CH}_2\text{Cl}_2$  and 48.0 mg (1.2 mmol) of NaOH was stirred for 15 minutes. Then TsCl (285.9 mg, 1.5 mmol) was added in one portion and the mixture was stirred at room temperature until no 1'*H*,3*H*-[2,3'-biindol]-3-one was detected by TLC. The solution was washed exhaustively with water, dried with  $\text{Na}_2\text{SO}_4$  and concentrated. The material was passed through a plug of silica gel (eluting with 30% petroleum ether/ $\text{CH}_2\text{Cl}_2$  to  $\text{CH}_2\text{Cl}_2$ ) and concentrated to furnish a red solid (345.1 mg, 86%). Spectral data

were in complete agreement with reported values.<sup>3</sup>

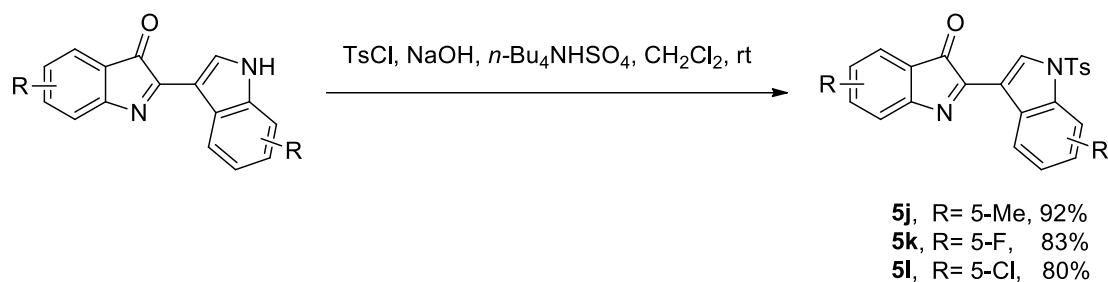

To a solution of the corresponding 1'*H*,3'*H*-[2,3'-biindol]-3-one (1.0 equiv.) in anhydrous DCM (0.1 M) was added *n*-Bu<sub>4</sub>NHSO<sub>4</sub> (0.1 equiv.) followed by addition of freshly powdered NaOH (4.0 equiv.). The resultant solution was allowed to stir at room temperature for 10 minutes before addition of TsCl (2.0 equiv.) and then allowed to stir at room temperature (monitored via TLC – typically 0.5-1 hours). After this time, the reaction was quenched with H<sub>2</sub>O (equal to reaction solvent volume), the organic phase was collected, and the aqueous phase was extracted three times with CH<sub>2</sub>Cl<sub>2</sub> (equal to reaction volume). The combined organic phases dried over MgSO<sub>4</sub>, filtered and solvent removed under reduced pressure. The material was passed through a plug of silica gel (eluting with 30% petroleum ether/CH<sub>2</sub>Cl<sub>2</sub> to CH<sub>2</sub>Cl<sub>2</sub>) and concentrated to furnish a red solid which was used without further purification for its low solubility.

**5,5'-dimethyl-1'-tosyl-1'*H*,3'*H*-[2,3'-biindol]-3-one (5j)**: m.p.: 212–214 °C; <sup>1</sup>H NMR (400 MHz, CDCl<sub>3</sub>) δ 8.74 (s, 1H), 8.32 (s, 1H), 7.89 (d, *J* = 8.5 Hz, 1H), 7.84 (d, *J* = 8.4 Hz, 2H), 7.36 (s, 1H), 7.30 (s, 2H), 7.27 – 7.18 (m, 3H), 2.49 (s, 3H), 2.37 (s, 3H), 2.35 (s, 3H); **HRMS (ESI)** found *m/z* 429.1265 [M + H]<sup>+</sup>, calcd for C<sub>25</sub>H<sub>21</sub>N<sub>2</sub>O<sub>3</sub>S 429.1273.

**5,5'-difluoro-1'-tosyl-1'*H*,3'*H*-[2,3'-biindol]-3-one (5k)**: m.p.: 256–258 °C; <sup>1</sup>H NMR (400 MHz, CDCl<sub>3</sub>) δ 8.77 (s, 1H), 8.22 (dd, *J* = 9.0, 2.6 Hz, 1H), 7.96 (dd, *J* = 9.1, 4.3 Hz, 1H), 7.84 (d, *J* = 8.4 Hz, 2H), 7.37 (dd, *J* = 8.2, 4.1 Hz, 1H), 7.30 – 7.24 (m, 3H), 7.23 – 7.11 (m, 2H), 2.37 (s, 1H); <sup>19</sup>F NMR (376 MHz, CDCl<sub>3</sub>) δ –113.11 (ddd, *J* = 8.8, 6.3, 4.2 Hz, 1F), –117.37 (td, *J* = 8.9, 4.3 Hz, 1F); **HRMS (ESI)** found *m/z* 437.0763 [M + H]<sup>+</sup>, calcd for C<sub>23</sub>H<sub>15</sub>F<sub>2</sub>N<sub>2</sub>O<sub>3</sub>S 437.0771.

**5,5'-dichloro-1'-tosyl-1'*H*,3'*H*-[2,3'-biindol]-3-one (5l)**: m.p.: 251–252 °C; <sup>1</sup>H NMR (400 MHz, CDCl<sub>3</sub>) δ 8.77 (s, 1H), 8.53 (d, *J* = 2.0 Hz, 1H), 7.94 (d, *J* = 8.8 Hz, 1H), 7.84 (d, *J* = 8.4 Hz, 2H), 7.56 – 7.46 (m, 2H), 7.42 – 7.35 (m, 2H), 7.29 (d, *J* = 8.1 Hz, 2H), 2.37 (s, 3H); **HRMS (ESI)** found *m/z* 469.0176 [M + H]<sup>+</sup>, calcd for C<sub>23</sub>H<sub>15</sub>Cl<sub>2</sub>N<sub>2</sub>O<sub>3</sub>S 469.0180.

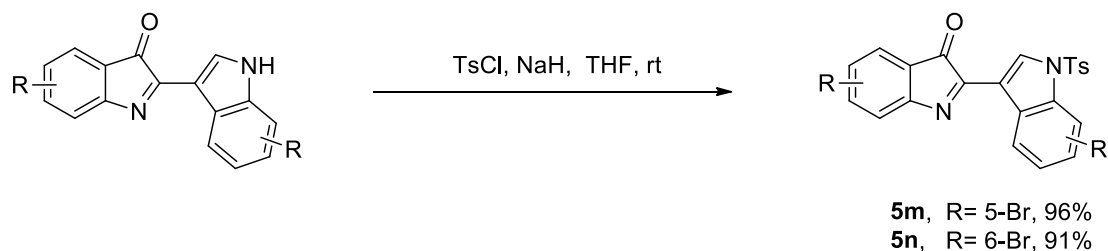

Sodium hydride (1.1 equiv.) was carefully added to a solution of 1'*H*,3'*H*-[2,3'-biindol]-3-one (1.0 equiv.) in anhydrous THF (0.1 M) at 0 °C. The mixture was stirred at this temperature for 15 minutes. Then TsCl (1.02 equiv.) was added in one portion and the mixture was stirred at room temperature. After completion of the reaction (monitored by TLC), the crude mixture was extracted with CH<sub>2</sub>Cl<sub>2</sub> and the organic layer was dried over Na<sub>2</sub>SO<sub>4</sub>, concentrated under reduced pressure. The material was passed through a plug of silica gel (eluting with 30% petroleum

ether/CH<sub>2</sub>Cl<sub>2</sub> to CH<sub>2</sub>Cl<sub>2</sub>) and concentrated to furnish a red solid which was used without further purification for its low solubility.

**5,5'-dibromo-1'-tosyl-1'*H*,3*H*-[2,3'-biindol]-3-one (5m)**: m.p.: 169–171 °C; <sup>1</sup>H NMR (400 MHz, CDCl<sub>3</sub>) δ 8.76 (s, 1H), 8.69 (d, *J* = 2.0 Hz, 1H), 7.89 (d, *J* = 8.8 Hz, 1H), 7.84 (d, *J* = 8.4 Hz, 2H), 7.67 (dt, *J* = 4.5, 2.1 Hz, 2H), 7.52 (dd, *J* = 8.8, 2.0 Hz, 1H), 7.32 (d, *J* = 8.6 Hz, 1H), 7.29 (d, *J* = 8.4 Hz, 2H), 2.37 (s, 3H); **HRMS (ESI)** found *m/z* 556.9171 [M + H]<sup>+</sup>, calcd for C<sub>23</sub>H<sub>15</sub>Br<sub>2</sub>N<sub>2</sub>O<sub>3</sub>S 556.9170.

**6,6'-dibromo-1'-tosyl-1'*H*,3*H*-[2,3'-biindol]-3-one (5n)**: m.p.: 275–278 °C; <sup>1</sup>H NMR (400 MHz, CDCl<sub>3</sub>) δ 8.77 (s, 1H), 8.39 (d, *J* = 8.0 Hz, 1H), 8.20 (d, *J* = 1.6 Hz, 1H), 7.86 (d, *J* = 8.4 Hz, 2H), 7.58 (d, *J* = 1.2 Hz, 1H), 7.51 (dd, *J* = 8.5, 1.7 Hz, 1H), 7.46 – 7.36 (m, 2H), 7.31 (d, *J* = 8.3 Hz, 2H), 2.38 (s, 3H); **HRMS (ESI)** found *m/z* 556.9175 [M + H]<sup>+</sup>, calcd for C<sub>23</sub>H<sub>15</sub>Br<sub>2</sub>N<sub>2</sub>O<sub>3</sub>S 556.9170.

### General procedure for the reaction of 2-aryl-3*H*-indol-3-ones **1** with simple ketones **2**

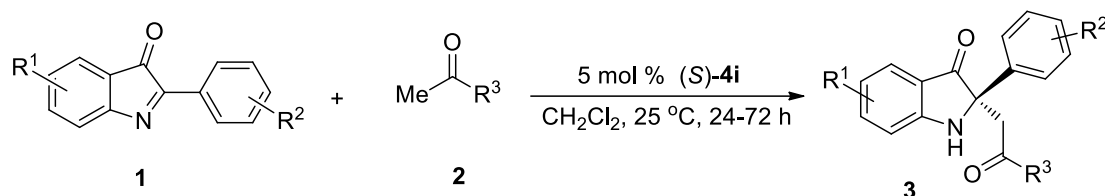

To a 10 mL Schlenk flask equipped with a stirring bar was added 2-aryl substituted 3*H*-indol-3-ones **1** (0.1 mmol), chiral phosphoric acid (*S*)-**4i** (0.005 mmol, 5 mol %), CH<sub>2</sub>Cl<sub>2</sub> (1 mL). Simple ketones **2** (1.0 mmol, 10.0 equiv) was added to the mixture. Then the resulting mixture was stirred at room temperature until the completion of the reaction (monitored by TLC), concentrated under vacuum, and the residue was purified by flash chromatography on silica gel (eluting with petroleum ether/ethyl acetate = 4/1) to give the desired product **3**.

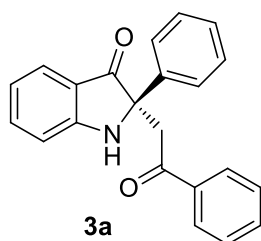

**(R)-2-(2-oxo-2-phenylethyl)-2-phenylindolin-3-one (3a)**: yellow solid; 31.4 mg; 96% yield; 86% ee, (after recrystallization from petroleum ether/ethyl acetate, mother liquid, 88% yield, 96% ee); [determined by **HPLC** analysis Daicel Chirapak AD-H, *n*-hexane/*i*-PrOH = 70/30, 254 nm UV detector, 1.0 mL/min, *t<sub>R</sub>* = 14.9 min (major) and *t<sub>R</sub>* = 21.4 min (minor)]; m.p.: 149–151 °C; [α]<sub>D</sub><sup>20</sup> – 41.6 (*c* 1.0, CH<sub>2</sub>Cl<sub>2</sub>); <sup>1</sup>H NMR (400 MHz, CDCl<sub>3</sub>) δ 7.90 (dd, *J* = 8.4, 1.2 Hz, 2H), 7.64 – 7.52 (m, 4H), 7.52 – 7.38 (m, 3H), 7.27 (ddd, *J* = 9.3, 3.7, 2.1 Hz, 2H), 7.22 – 7.15 (m, 1H), 6.95 (d, *J* = 8.3 Hz, 1H), 6.84 – 6.73 (m, 1H), 6.31 (s, br, 1H), 4.43 (d, *J* = 18.0 Hz, 1H), 3.17 (d, *J* = 18.0 Hz, 1H); <sup>13</sup>C NMR (100 MHz, CDCl<sub>3</sub>) δ 200.8, 197.9, 160.4, 138.1, 137.9, 136.7, 133.9, 128.9, 128.8, 128.2, 127.7, 125.8, 125.4, 119.0, 118.3, 111.9, 69.4, 44.8; **IR (KBr)** ν 3434, 2958, 2925, 1718, 1693, 1615, 1480, 1227, 1069, 747 cm<sup>-1</sup>; **HRMS (ESI)** found *m/z* 328.1339 [M + H]<sup>+</sup>, calcd for C<sub>22</sub>H<sub>18</sub>NO<sub>2</sub> 328.1338. Physical and spectral properties of this material were identical to those previously reported in literature.<sup>6</sup>

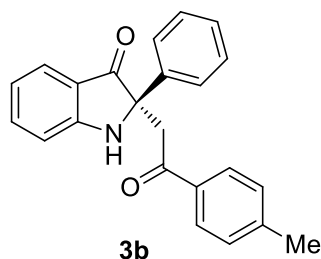

**(R)-2-(2-oxo-2-(*p*-tolyl)ethyl)-2-phenylindolin-3-one (3b):** yellow solid; 33.5 mg; 98% yield; 87% ee, (after recrystallization from petroleum ether/ethyl acetate, mother liquid, 94% yield, 90% ee); [determined by **HPLC** analysis Daicel Chirapak AD-H, *n*-hexane/*i*-PrOH = 60/40, 254 nm UV detector, 1.0 mL/min,  $t_R$  = 11.9 min (major) and  $t_R$  = 20.5 min (minor)]; m.p.: 179–181 °C;  $[\alpha]_D^{20}$  – 48.7 (*c* 1.0, CH<sub>2</sub>Cl<sub>2</sub>); **<sup>1</sup>H NMR** (400 MHz, CDCl<sub>3</sub>) δ 7.82 (d, *J* = 8.2 Hz, 2H), 7.64 – 7.52 (m, 3H), 7.48 (ddd, *J* = 8.3, 7.2, 1.3 Hz, 1H), 7.31–7.17 (m, 5H), 6.96 (d, *J* = 8.3 Hz, 1H), 6.80 (t, *J* = 7.4 Hz, 1H), 6.32 (s, br, 1H), 4.42 (d, *J* = 17.8 Hz, 1H), 3.13 (d, *J* = 17.8 Hz, 1H), 2.40 (s, 3H); **<sup>13</sup>C NMR** (100 MHz, CDCl<sub>3</sub>) δ 200.9, 197.5, 160.4, 144.8, 138.2, 137.9, 134.3, 129.5, 128.8, 128.4, 127.6, 125.7, 125.5, 118.9, 118.3, 111.9, 69.5, 44.6, 21.8; **IR (KBr)** ν 3381, 2964, 2854, 1693, 1619, 1227, 1190, 1054, 744 cm<sup>-1</sup>; **HRMS** (ESI) found *m/z* 342.1495 [M + H]<sup>+</sup>, calcd for C<sub>23</sub>H<sub>20</sub>NO<sub>2</sub> 342.1494. Physical and spectral properties of this material were identical to those previously reported in literature.<sup>6</sup>

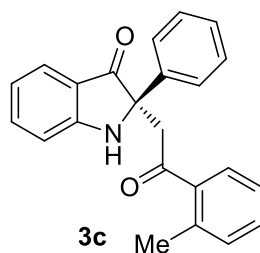

**(R)-2-(2-oxo-2-(*o*-tolyl)ethyl)-2-phenylindolin-3-one (3c):** yellow solid; 25.6 mg; 75% yield; 83% ee, (after recrystallization from petroleum ether/ethyl acetate, mother liquid, 62% yield, 96% ee); [determined by **HPLC** analysis Daicel Chirapak AD-H, *n*-hexane/*i*-PrOH = 70/30, 254 nm UV detector, 1.0 mL/min,  $t_R$  = 11.5 min (major) and  $t_R$  = 16.5 min (minor)]; m.p.: 76–78 °C;  $[\alpha]_D^{20}$  – 38.1 (*c* 1.0, CH<sub>2</sub>Cl<sub>2</sub>); **<sup>1</sup>H NMR** (400 MHz, CDCl<sub>3</sub>) δ 7.63 (d, *J* = 7.7 Hz, 1H), 7.56 (t, *J* = 8.6 Hz, 3H), 7.50 (t, *J* = 7.7 Hz, 1H), 7.37 (t, *J* = 7.4 Hz, 1H), 7.31 – 7.16 (m, 5H), 6.99 (d, *J* = 8.2 Hz, 1H), 6.81 (t, *J* = 7.4 Hz, 1H), 6.36 (s, br, 1H), 4.30 (d, *J* = 17.3 Hz, 1H), 3.13 (d, *J* = 17.3 Hz, 1H), 2.26 (s, 1H); **<sup>13</sup>C NMR** (150 MHz, CDCl<sub>3</sub>) δ 202.1, 200.6, 128.8, 128.8, 127.7, 126.0, 125.8, 125.6, 119.1, 118.4, 112.0, 69.8, 47.7, 21.2; **IR (KBr)** ν 3385, 2961, 2920, 2851, 1689, 1622, 1093, 750 cm<sup>-1</sup>; **HRMS** (ESI) found *m/z* 342.1487 [M + H]<sup>+</sup>, calcd for C<sub>23</sub>H<sub>20</sub>NO<sub>2</sub> 342.1494.

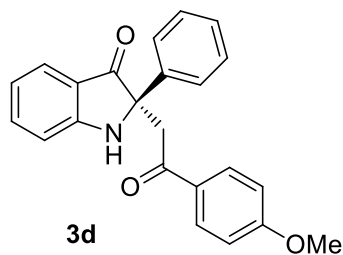

**(R)-2-(2-(4-methoxyphenyl)-2-oxoethyl)-2-phenylindolin-3-one (3d)**: yellow solid; 32.9 mg; 92% yield; 94% ee, (after recrystallization from petroleum ether/ethyl acetate, mother liquid, 87% yield, 99% ee); [determined by **HPLC** analysis Daicel Chirapak AD-H, *n*-hexane/*i*-PrOH = 60/40, 254 nm UV detector, 1.0 mL/min,  $t_R = 15.3$  min (major) and  $t_R = 32.5$  min (minor)]; m.p.: 203–204 °C;  $[\alpha]_D^{20} - 44.2$  (*c* 1.0, CH<sub>2</sub>Cl<sub>2</sub>); **<sup>1</sup>H NMR** (400 MHz, CDCl<sub>3</sub>)  $\delta$  7.91 (d, *J* = 8.9 Hz, 2H), 7.56 (dd, *J* = 9.9, 8.4 Hz, 3H), 7.52 – 7.46 (m, 1H), 7.30 – 7.17 (m, 4H), 6.96 (d, *J* = 8.3 Hz, 1H), 6.94 – 6.88 (m, 2H), 6.80 (t, *J* = 7.2 Hz, 1H), 6.36 (s, br, 1H), 4.39 (d, *J* = 17.7 Hz, 1H), 3.86 (s, 3H), 3.10 (d, *J* = 17.7 Hz, 1H); **<sup>13</sup>C NMR** (100 MHz, CDCl<sub>3</sub>)  $\delta$  201.0, 196.3, 164.1, 160.4, 138.3, 137.9, 130.6, 129.9, 128.8, 127.6, 125.7, 125.5, 118.9, 118.3, 114.0, 111.9, 69.5, 55.6, 44.4; **IR (KBr)**  $\nu$  3392, 2965, 2838, 1682, 1625, 1225, 740 cm<sup>-1</sup>; **HRMS** (ESI) found *m/z* 358.1449 [M + H]<sup>+</sup>, calcd for C<sub>23</sub>H<sub>20</sub>NO<sub>3</sub> 358.1443. Physical and spectral properties of this material were identical to those previously reported in literature.<sup>7</sup>

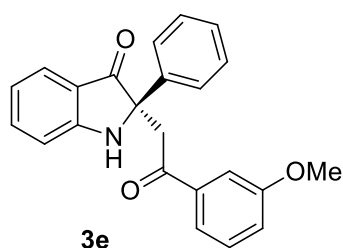

**(R)-2-(2-(3-methoxyphenyl)-2-oxoethyl)-2-phenylindolin-3-one (3e)**: yellow solid; 33.2 mg; 93% yield; 78% ee, (after recrystallization from petroleum ether/ethyl acetate, mother liquid, 91% yield, 80% ee); [determined by **HPLC** analysis Daicel Chirapak AD-H, *n*-hexane/*i*-PrOH = 60/40, 254 nm UV detector, 1.0 mL/min,  $t_R = 7.3$  min (major) and  $t_R = 8.2$  min (minor)]; m.p.: 97–99 °C;  $[\alpha]_D^{20} - 42.5$  (*c* 1.0, CH<sub>2</sub>Cl<sub>2</sub>); **<sup>1</sup>H NMR** (400 MHz, CDCl<sub>3</sub>)  $\delta$  7.61 – 7.46 (m, 5H), 7.37 (dd, *J* = 16.4, 8.4 Hz, 2H), 7.31–7.20 (m, 3H), 7.12 (d, *J* = 6.6 Hz, 1H), 6.97 (d, *J* = 8.2 Hz, 1H), 6.81 (t, *J* = 7.4 Hz, 1H), 6.26 (s, br, 1H), 4.42 (d, *J* = 18.0 Hz, 1H), 3.81 (s, 3H), 3.19 (d, *J* = 18.0 Hz, 1H); **<sup>13</sup>C NMR** (100 MHz, CDCl<sub>3</sub>)  $\delta$  200.7, 197.8, 160.3, 160.0, 138.1, 137.9, 129.9, 128.9, 127.7, 125.8, 125.4, 121.0, 120.6, 119.0, 118.3, 112.1, 111.9, 69.4, 55.6, 45.0; **IR (KBr)**  $\nu$  3386, 2963, 2843, 1695, 1623, 1517, 1220, 742 cm<sup>-1</sup>; **HRMS** (ESI) found *m/z* 358.1443 [M + H]<sup>+</sup>, calcd for C<sub>23</sub>H<sub>20</sub>NO<sub>3</sub> 358.1440.

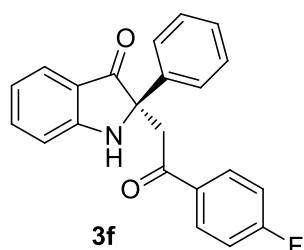

**(R)-2-(2-(4-fluorophenyl)-2-oxoethyl)-2-phenylindolin-3-one (3f)**: yellow solid; 32.1 mg; 93% yield; 85% ee, (after recrystallization from petroleum ether/ethyl acetate, mother liquid, 90% yield, 89% ee); [determined by **HPLC** analysis Daicel Chirapak AD-H, *n*-hexane/*i*-PrOH = 60/40, 254 nm UV detector, 1.0 mL/min,  $t_R = 11.3$  min (major) and  $t_R = 24.3$  min (minor)]; m.p.: 138–140 °C;  $[\alpha]_D^{20} - 45.2$  (*c* 1.0, CH<sub>2</sub>Cl<sub>2</sub>); **<sup>1</sup>H NMR** (400 MHz, DMSO-*d*<sub>6</sub>)  $\delta$  8.04 (dd, *J* = 8.8, 5.6 Hz, 2H), 7.91 (s, br, 1H), 7.54 (dd, *J* = 8.3, 1.2 Hz, 2H), 7.50 – 7.43 (m, 1H), 7.40 (d, *J* = 7.7 Hz, 1H), 7.32 (dd, *J* = 11.5, 4.4 Hz, 4H), 7.24 (t, *J* = 7.2 Hz, 1H), 7.05 – 6.94 (m, 1H), 6.72 (t, *J* = 7.3 Hz, 1H),

4.19 (d,  $J = 17.4$  Hz, 1H), 3.75 (d,  $J = 18.1$  Hz, 1H);  $^{13}\text{C}$  NMR (100 MHz, DMSO- $d_6$ )  $\delta$  200.8, 195.2, 165.4 (d,  $J = 252.2$  Hz), 161.4, 139.5, 137.2, 133.4 (d,  $J = 2.8$  Hz), 131.4 (d,  $J = 9.5$  Hz), 128.6, 127.5, 125.8, 124.6, 118.5, 117.7, 115.9 (d,  $J = 21.9$  Hz), 112.2, 69.0, 45.9; IR (KBr)  $\nu$  3380, 2955, 2920, 2851, 2336, 1683, 1327, 1208, 551  $\text{cm}^{-1}$ ; HRMS (ESI) found  $m/z$  346.1242 [ $\text{M} + \text{H}$ ] $^+$ , calcd for  $\text{C}_{22}\text{H}_{17}\text{FNO}_2$  346.1243. Physical and spectral properties of this material were identical to those previously reported in literature.<sup>8</sup>

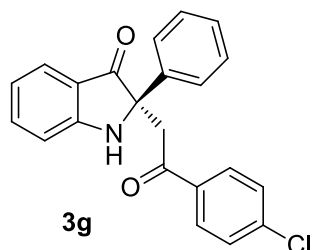

**(R)-2-(2-(4-chlorophenyl)-2-oxoethyl)-2-phenylindolin-3-one (3g)**: yellow solid; 34.0 mg; 94% yield; 87% ee, (after recrystallization from petroleum ether/ethyl acetate, mother liquid, 92% yield, 90% ee); [determined by HPLC analysis Daicel Chirapak AD-H,  $n$ -hexane/ $i$ -PrOH = 60/40, 254 nm UV detector, 1.0 mL/min,  $t_R = 12.5$  min (major) and  $t_R = 26.3$  min (minor)]; m.p.: 171–174 °C;  $[\alpha]_D^{20} - 53.3$  ( $c$  1.0,  $\text{CH}_2\text{Cl}_2$ );  $^1\text{H}$  NMR (400 MHz,  $\text{CDCl}_3$ )  $\delta$  7.85 (d,  $J = 8.6$  Hz, 2H), 7.58 (d,  $J = 7.7$  Hz, 1H), 7.51 (m, 3H), 7.42 (d,  $J = 8.6$  Hz, 2H), 7.31-7.27 (m, 2H), 7.25 – 7.18 (m, 1H), 6.97 (d,  $J = 8.3$  Hz, 1H), 6.82 (t,  $J = 7.4$  Hz, 1H), 6.23 (s, br, 1H), 4.38 (d,  $J = 17.9$  Hz, 1H), 3.16 (d,  $J = 17.9$  Hz, 1H);  $^{13}\text{C}$  NMR (100 MHz,  $\text{CDCl}_3$ )  $\delta$  200.6, 196.7, 160.3, 140.4, 138.0, 138.0, 135.0, 129.6, 129.2, 128.9, 127.8, 125.8, 125.4, 119.1, 118.3, 111.9, 69.3, 44.9; IR (KBr)  $\nu$  3443, 2965, 2923, 2850, 1697, 1675, 748, 510  $\text{cm}^{-1}$ ; HRMS (ESI) found  $m/z$  362.0943 [ $\text{M} + \text{H}$ ] $^+$ , calcd for  $\text{C}_{22}\text{H}_{17}\text{ClNO}_2$  362.0948. Physical and spectral properties of this material were identical to those previously reported in literature.<sup>7</sup>

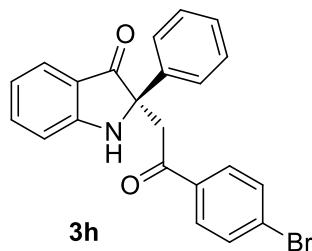

**(R)-2-(2-(4-bromophenyl)-2-oxoethyl)-2-phenylindolin-3-one (3h)**: yellow solid; 38.6 mg; 95% yield; 85% ee, (after recrystallization from petroleum ether/ethyl acetate, mother liquid, 89% yield, 93% ee); [determined by HPLC analysis Daicel Chirapak AD-H,  $n$ -hexane/ $i$ -PrOH = 60/40, 254 nm UV detector, 1.0 mL/min,  $t_R = 18.2$  min (major) and  $t_R = 37.4$  min (minor)]; m.p.: 178–180 °C;  $[\alpha]_D^{20} - 46.6$  ( $c$  1.0,  $\text{CH}_2\text{Cl}_2$ );  $^1\text{H}$  NMR (400 MHz,  $\text{CDCl}_3$ )  $\delta$  7.77 (d,  $J = 8.6$  Hz, 2H), 7.58 (dd,  $J = 8.0, 3.7$  Hz, 3H), 7.55 – 7.51 (m, 2H), 7.51 – 7.44 (m, 1H), 7.29 (t,  $J = 7.5$  Hz, 2H), 7.22 (t,  $J = 7.2$  Hz, 1H), 6.97 (d,  $J = 8.3$  Hz, 1H), 6.82 (t,  $J = 7.4$  Hz, 1H), 6.22 (s, br, 1H), 4.37 (d,  $J = 17.9$  Hz, 1H), 3.16 (d,  $J = 17.9$  Hz, 1H);  $^{13}\text{C}$  NMR (100 MHz,  $\text{CDCl}_3$ )  $\delta$  200.6, 196.9, 160.3, 138.0, 138.0, 135.4, 132.2, 129.7, 129.2, 128.9, 127.8, 125.8, 125.4, 119.1, 118.3, 111.9, 69.3, 44.9; IR (KBr)  $\nu$  3440, 3059, 2923, 2851, 1690, 1675, 730, 628  $\text{cm}^{-1}$ ; HRMS (ESI) found  $m/z$  406.0441 [ $\text{M} + \text{H}$ ] $^+$ , calcd for  $\text{C}_{22}\text{H}_{17}\text{BrNO}_2$  406.0443. Physical and spectral properties of this material were identical to those previously reported in literature.<sup>8</sup>

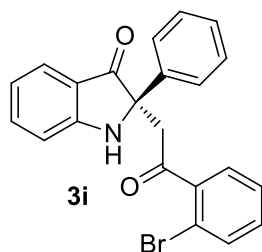

**(R)-2-(2-(2-bromophenyl)-2-oxoethyl)-2-phenylindolin-3-one (3i)**: yellow solid; 32.5 mg; 80% yield; 78% ee, (after recrystallization from petroleum ether/ethyl acetate, mother liquid, 70% yield, 96% ee); [determined by **HPLC** analysis Daicel Chirapak AD-H, *n*-hexane/*i*-PrOH = 80/20, 254 nm UV detector, 0.8 mL/min,  $t_R$  = 29.0 min (minor) and  $t_R$  = 33.1 min (major)]; m.p.: 53–55 °C;  $[\alpha]_D^{20}$  – 27.7 (*c* 1.0, CH<sub>2</sub>Cl<sub>2</sub>); **<sup>1</sup>H NMR** (400 MHz, CDCl<sub>3</sub>) δ 7.58 – 7.52 (m, 4H), 7.49 (ddd, *J* = 8.3, 7.2, 1.3 Hz, 1H), 7.31 – 7.26 (m, 2H), 7.26 – 7.19 (m, 3H), 7.16 – 7.08 (m, 1H), 6.99 (d, *J* = 8.3 Hz, 1H), 6.84 – 6.76 (m, 1H), 6.24 (s, 1H), 4.25 (d, *J* = 17.3 Hz, 1H), 3.25 (d, *J* = 17.3 Hz, 1H); **<sup>13</sup>C NMR** (100 MHz, CDCl<sub>3</sub>) δ 201.9, 200.1, 160.2, 141.0, 137.9, 137.8, 133.9, 132.2, 128.9, 128.8, 127.8, 127.5, 125.7, 119.2, 118.9, 118.4, 112.1, 69.5, 49.3; **IR (KBr)**  $\nu$  3392, 2959, 2920, 2850, 1670, 1486, 1210, 701 cm<sup>-1</sup>; **HRMS** (ESI) found *m/z* 406.0438 [M + H]<sup>+</sup>, calcd for C<sub>22</sub>H<sub>17</sub>BrNO<sub>2</sub> 406.0443.

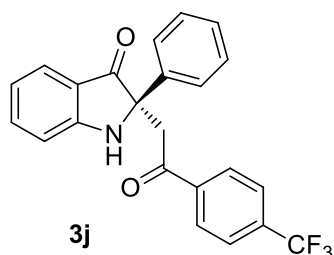

**(R)-2-(2-oxo-2-(4-(trifluoromethyl)phenyl)ethyl)-2-phenylindolin-3-one (3j)**: yellow solid; 36.4 mg; 92% yield; 88% ee, (after recrystallization from petroleum ether/ethyl acetate, mother liquid, 91% yield, 90% ee); [determined by **HPLC** analysis Daicel Chirapak AD-H, *n*-hexane/*i*-PrOH = 70/30, 254 nm UV detector, 1.0 mL/min,  $t_R$  = 12.9 min (major) and  $t_R$  = 24.0 min (minor)]; m.p.: 56–58 °C;  $[\alpha]_D^{20}$  – 47.4 (*c* 1.0, CH<sub>2</sub>Cl<sub>2</sub>); **<sup>1</sup>H NMR** (400 MHz, CDCl<sub>3</sub>) δ 8.01 (d, *J* = 8.2 Hz, 2H), 7.72 (d, *J* = 8.3 Hz, 2H), 7.59 (d, *J* = 7.7 Hz, 1H), 7.55 – 7.47 (m, 3H), 7.30 (t, *J* = 7.4 Hz, 2H), 7.23 (dd, *J* = 8.3, 6.2 Hz, 1H), 6.98 (d, *J* = 8.3 Hz, 1H), 6.83 (t, *J* = 7.3 Hz, 1H), 6.17 (s, br, 1H), 4.42 (d, *J* = 17.9 Hz, 1H), 3.24 (d, *J* = 17.9 Hz, 1H); **<sup>13</sup>C NMR** (100 MHz, CDCl<sub>3</sub>) δ 200.4, 197.0, 160.3, 139.2, 138.0, 137.9, 135.2 (d, *J* = 32.9 Hz), 128.9, 128.6, 127.9, 125.9 (dd, *J* = 7.2, 3.6 Hz), 125.8, 125.3, 119.2, 118.3, 111.9, 69.2, 45.3; **IR (KBr)**  $\nu$  3380, 2953, 2924, 2853, 1688, 1323, 1119, 510 cm<sup>-1</sup>; **HRMS** (ESI) found *m/z* 396.1208 [M + H]<sup>+</sup>, calcd for C<sub>23</sub>H<sub>17</sub>F<sub>3</sub>NO<sub>2</sub> 396.1211. Physical and spectral properties of this material were identical to those previously reported in literature.<sup>8</sup>

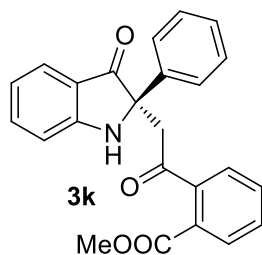



**(R)-2-(2-(2-bromophenyl)-2-oxoethyl)-2-phenylindolin-3-one (3k):** yellow solid; 29.2 mg; 76% yield; 85% ee, (after recrystallization from petroleum ether/ethyl acetate, mother liquid, 76% yield, 85% ee); [determined by **HPLC** analysis Daicel Chirapak AD-H, *n*-hexane/*i*-PrOH = 70/30, 254 nm UV detector, 1.0 mL/min,  $t_R = 22.8$  min (minor) and  $t_R = 30.0$  min (major)]; m.p.: 185–187 °C;  $[\alpha]_D^{20} - 37.2$  (*c* 1.0, CH<sub>2</sub>Cl<sub>2</sub>); **<sup>1</sup>H NMR** (400 MHz, CDCl<sub>3</sub>) δ 7.85 (m, 1H), 7.66 – 7.60 (m, 2H), 7.56 (d, *J* = 7.7 Hz, 1H), 7.53 – 7.47 (m, 1H), 7.47 – 7.43 (m, 2H), 7.32 – 7.20 (m, 3H), 7.03 (d, *J* = 8.3 Hz, 1H), 7.00 – 6.95 (m, 1H), 6.82 (t, *J* = 7.4 Hz, 1H), 6.34 (s, br, 1H), 3.97 (d, *J* = 17.2 Hz, 1H), 3.77 (s, 3H), 3.32 (d, *J* = 17.2 Hz, 1H); **<sup>13</sup>C NMR** (100 MHz, CDCl<sub>3</sub>) δ 203.5, 200.8, 167.1, 160.6, 142.8, 138.3, 137.7, 132.5, 130.3, 130.0, 128.7, 128.2, 127.8, 126.4, 125.9, 125.6, 119.1, 118.9, 112.4, 69.3, 52.7, 49.5; **IR (KBr)**  $\nu$  3392, 2952, 2916, 2860, 1710, 1613, 1462, 551 cm<sup>-1</sup>; **HRMS** (ESI) found *m/z* 386.1388 [M + H]<sup>+</sup>, calcd for C<sub>24</sub>H<sub>20</sub>NO<sub>4</sub> 386.1392.

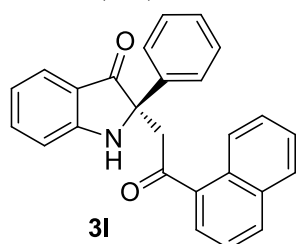

**(R)-2-(2-(naphthalen-1-yl)-2-oxoethyl)-2-phenylindolin-3-one (3l):** yellow solid; 34.7 mg; 92% yield; 79% ee, (after recrystallization from petroleum ether/ethyl acetate, mother liquid, 76% yield, 99% ee); [determined by **HPLC** analysis Daicel Chirapak AD-H, *n*-hexane/*i*-PrOH = 70/30, 254 nm UV detector, 1.0 mL/min,  $t_R = 14.1$  min (major) and  $t_R = 19.2$  min (minor)]; m.p.: 133–135 °C;  $[\alpha]_D^{20} - 49.1$  (*c* 1.0, CH<sub>2</sub>Cl<sub>2</sub>); **<sup>1</sup>H NMR** (400 MHz, CDCl<sub>3</sub>) δ 8.31 (dd, *J* = 8.3, 1.5 Hz, 1H), 7.98 (d, *J* = 8.2 Hz, 1H), 7.92 – 7.81 (m, 2H), 7.63 – 7.55 (m, 3H), 7.54 – 7.44 (m, 4H), 7.32 – 7.26 (m, 2H), 7.25 – 7.18 (m, 1H), 7.01 (d, *J* = 8.3 Hz, 1H), 6.88 – 6.73 (m, 1H), 6.41 (s, br, 1H), 4.43 (d, *J* = 17.3 Hz, 1H), 3.35 (d, *J* = 17.3 Hz, 1H); **<sup>13</sup>C NMR** (100 MHz, CDCl<sub>3</sub>) δ 202.0, 200.6, 160.4, 138.2, 137.9, 135.5, 134.0, 133.5, 130.0, 128.9, 128.6, 128.3, 128.2, 127.8, 126.7, 125.8, 125.7, 125.6, 124.4, 119.1, 118.4, 112.0, 69.9, 48.2; **IR (KBr)**  $\nu$  3344, 2964, 2920, 2850, 1673, 1472, 1187, 819, 751, 530 cm<sup>-1</sup>; **HRMS** (ESI) found *m/z* 378.1486 [M + H]<sup>+</sup>, calcd for C<sub>26</sub>H<sub>19</sub>NO<sub>2</sub> 378.1494.

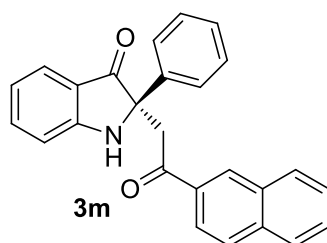

**(R)-2-(2-(naphthalen-2-yl)-2-oxoethyl)-2-phenylindolin-3-one (3m):** yellow solid; 33.9 mg; 90% yield; 77% ee, (after recrystallization from petroleum ether/ethyl acetate, mother liquid, 82% yield, 97% ee); [determined by **HPLC** analysis Daicel Chirapak AD-H, *n*-hexane/*i*-PrOH = 60/40, 254 nm UV detector, 1.0 mL/min,  $t_R = 14.8$  min (major) and  $t_R = 24.9$  min (minor)]; m.p.: 212–214 °C;  $[\alpha]_D^{20} - 49.9$  (*c* 1.0, CH<sub>2</sub>Cl<sub>2</sub>); **<sup>1</sup>H NMR** (400 MHz, CDCl<sub>3</sub>) δ 8.49 (s, 1H), 8.04 – 7.90 (m, 2H), 7.86 (d, *J* = 8.4 Hz, 2H), 7.64 – 7.54 (m, 5H), 7.53–7.49 (m, 1H), 7.32 – 7.26 (m, 2H), 7.24 – 7.18 (m, 1H), 6.99 (d, *J* = 8.3 Hz, 1H), 6.87 – 6.76 (m, 1H), 6.36 (s, br, 1H), 4.61 (d, *J* = 17.8 Hz, 1H), 3.30 (d, *J* = 17.8 Hz, 1H); **<sup>13</sup>C NMR** (100 MHz, CDCl<sub>3</sub>) δ 200.9, 197.8, 160.4, 138.2, 137.9, 136.0, 134.1, 132.6, 130.4, 129.8, 129.0, 128.8, 128.8, 127.9, 127.7, 127.1, 125.8,

125.5, 123.6, 119.0, 118.4, 112.0, 69.6, 44.9; **IR (KBr)**  $\nu$  3336, 2956, 2922, 2852, 1673, 1490, 1165, 820, 755, 527  $\text{cm}^{-1}$ ; **HRMS (ESI)** found  $m/z$  378.1489  $[\text{M} + \text{H}]^+$ , calcd for  $\text{C}_{26}\text{H}_{19}\text{NO}_2$  378.1494. Physical and spectral properties of this material were identical to those previously reported in literature.<sup>8</sup>

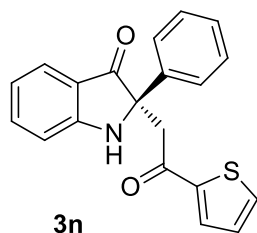

**(R)-2-(2-oxo-2-(thiophen-2-yl)ethyl)-2-phenylindolin-3-one (3n)**: yellow solid; 31.3 mg; 94% yield; 74% ee, (after recrystallization from petroleum ether/ethyl acetate, mother liquid, 72% yield, 97% ee); [determined by **HPLC** analysis Daicel Chirapak AD-H, *n*-hexane/*i*-PrOH = 70/30, 254 nm UV detector, 1.0 mL/min,  $t_R$  = 18.0 min (major) and  $t_R$  = 22.6 min (minor)]; m.p.: 115–117°C;  $[\alpha]_D^{20}$  – 31.7 (*c* 1.0,  $\text{CH}_2\text{Cl}_2$ );  **$^1\text{H NMR}$**  (400 MHz,  $\text{DMSO-}d_6$ )  $\delta$  8.06 (dd,  $J$  = 3.8, 1.1 Hz, 1H), 7.99 (dd,  $J$  = 4.9, 1.1 Hz, 1H), 7.96 (s, br, 1H), 7.57 – 7.50 (m, 2H), 7.46 (ddd,  $J$  = 8.3, 7.1, 1.3 Hz, 1H), 7.42 – 7.37 (m, 1H), 7.36 – 7.29 (m, 2H), 7.28 – 7.20 (m, 2H), 7.01 (d,  $J$  = 8.3 Hz, 1H), 6.81 – 6.59 (m, 1H), 4.13 (d,  $J$  = 17.5 Hz, 1H), 3.68 (d,  $J$  = 17.5 Hz, 1H);  **$^{13}\text{C NMR}$**  (100 MHz,  $\text{DMSO-}d_6$ )  $\delta$  200.5, 189.6, 161.4, 143.8, 139.3, 137.3, 135.5, 134.3, 129.1, 128.7, 127.6, 125.8, 124.6, 118.4, 117.7, 112.1, 69.1, 46.1; **IR (KBr)**  $\nu$  3375, 2956, 2916, 2854, 1687, 1620, 1466, 749  $\text{cm}^{-1}$ ; **HRMS (ESI)** found  $m/z$  334.0894  $[\text{M} + \text{H}]^+$ , calcd for  $\text{C}_{20}\text{H}_{16}\text{NO}_2\text{S}$  334.0902.

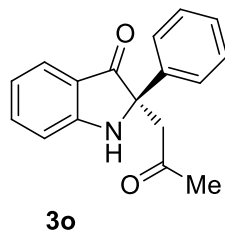

**(R)-2-(2-oxopropyl)-2-phenylindolin-3-one (3o)**: yellow solid; 24.1 mg; 91% yield; 80% ee, (after recrystallization from petroleum ether/ethyl acetate, mother liquid, 77% yield, 98% ee); [determined by **HPLC** analysis Daicel Chirapak AD-H, *n*-hexane/*i*-PrOH = 70/30, 254 nm UV detector, 1.0 mL/min,  $t_R$  = 18.1 min (major) and  $t_R$  = 28.1 min (minor)]; m.p.: 67–69 °C;  $[\alpha]_D^{20}$  – 37.0 (*c* 1.0,  $\text{CH}_2\text{Cl}_2$ );  **$^1\text{H NMR}$**  (400 MHz,  $\text{CDCl}_3$ )  $\delta$  7.54 (d,  $J$  = 7.6 Hz, 3H), 7.48 (t,  $J$  = 7.7 Hz, 1H), 7.31 (t,  $J$  = 7.5 Hz, 2H), 7.27 – 7.20 (m, 1H), 6.95 (d,  $J$  = 8.2 Hz, 1H), 6.80 (t,  $J$  = 7.4 Hz, 1H), 6.11 (s, br, 1H), 3.73 (d,  $J$  = 17.3 Hz, 1H), 2.72 (d,  $J$  = 17.3 Hz, 1H), 2.10 (s, 3H);  **$^{13}\text{C NMR}$**  (100 MHz,  $\text{CDCl}_3$ )  $\delta$  206.9, 200.4, 160.2, 138.0, 137.8, 128.8, 127.8, 125.7, 125.5, 119.1, 118.4, 112.1, 69.1, 49.6, 31.6; **IR (KBr)**  $\nu$  3403, 2965, 2917, 2857, 1697, 1625, 1220, 752  $\text{cm}^{-1}$ ; **HRMS (ESI)** found  $m/z$  266.1175  $[\text{M} + \text{H}]^+$ , calcd for  $\text{C}_{17}\text{H}_{16}\text{NO}_2$  266.1181.

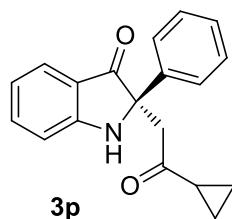

**(R)-2-(2-cyclopropyl-2-oxoethyl)-2-phenylindolin-3-one (3p)**: yellow solid; 22.9 mg; 79% yield;

65% ee, (after recrystallization from petroleum ether/ethyl acetate, mother liquid, 62% yield, 86% ee); [determined by **HPLC** analysis Daicel Chirapak AD-H, *n*-hexane/*i*-PrOH = 70/30, 254 nm UV detector, 1.0 mL/min,  $t_R$  = 9.4 min (major) and  $t_R$  = 11.9 min (minor)]; m.p.: 108–110 °C;  $[\alpha]_D^{20}$  – 34.1 (*c* 1.0, CH<sub>2</sub>Cl<sub>2</sub>); **<sup>1</sup>H NMR** (400 MHz, CDCl<sub>3</sub>) δ 7.58 – 7.51 (m, 3H), 7.51 – 7.43 (m, 1H), 7.31 (dd, *J* = 10.2, 4.8 Hz, 2H), 7.26 – 7.20 (m, 1H), 6.94 (d, *J* = 8.3 Hz, 1H), 6.80 (t, *J* = 7.4 Hz, 1H), 6.10 (s, br, 1H), 3.82 (d, *J* = 17.0 Hz, 1H), 2.89 (d, *J* = 17.0 Hz, 1H), 1.91 (tt, *J* = 7.3, 5.4 Hz, 1H), 1.03 – 0.90 (m, 1H), 0.89 – 0.74 (m, 3H); **<sup>13</sup>C NMR** (100 MHz, CDCl<sub>3</sub>) δ 208.9, 200.7, 160.3, 138.2, 137.8, 128.7, 127.7, 125.6, 125.6, 119.0, 118.5, 112.1, 69.3, 49.6, 22.0, 11.5, 11.4; **IR (KBr)** ν 3405, 2933, 2864, 1710, 1619, 1380, 1175 cm<sup>-1</sup>; **HRMS** (ESI) found *m/z* 292.1337 [M + H]<sup>+</sup>, calcd for C<sub>19</sub>H<sub>18</sub>NO<sub>2</sub> 292.1338.

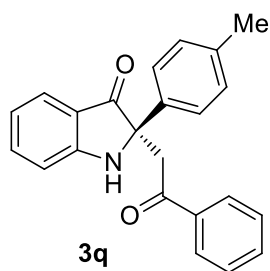

**(R)-2-(2-oxo-2-phenylethyl)-2-(*p*-tolyl)indolin-3-one (3q)**: yellow solid; 31.1 mg; 91% yield; 87% ee, (after recrystallization from petroleum ether/ethyl acetate, mother liquid, 83% yield, 96% ee); [determined by **HPLC** analysis Daicel Chirapak AD-H, *n*-hexane/*i*-PrOH = 60/40, 254 nm UV detector, 1.0 mL/min,  $t_R$  = 8.7 min (major) and  $t_R$  = 15.1 min (minor)]; m.p.: 206–207 °C;  $[\alpha]_D^{20}$  – 44.1 (*c* 1.0, CH<sub>2</sub>Cl<sub>2</sub>); **<sup>1</sup>H NMR** (400 MHz, CDCl<sub>3</sub>) δ 8.09 – 7.66 (m, 2H), 7.62 – 7.54 (m, 2H), 7.53 – 7.41 (m, 3H), 7.33 (d, *J* = 6.3 Hz, 2H), 7.21 – 7.11 (m, 1H), 7.02 (d, *J* = 7.4 Hz, 1H), 6.97 (d, *J* = 8.3 Hz, 1H), 6.83 – 6.74 (m, 1H), 6.25 (s, br, 1H), 4.43 (d, *J* = 17.9 Hz, 1H), 3.17 (d, *J* = 17.9 Hz, 1H), 2.29 (s, 3H); **<sup>13</sup>C NMR** (100 MHz, CDCl<sub>3</sub>) δ 200.8, 198.0, 160.3, 138.4, 138.0, 137.9, 136.7, 133.9, 128.9, 128.7, 128.6, 128.3, 126.0, 125.8, 122.5, 118.9, 118.3, 111.9, 69.4, 44.8, 21.8; **IR (KBr)** ν 3381, 2964, 2920, 2853, 1693, 1617, 1218, 1050, 743 cm<sup>-1</sup>; **HRMS** (ESI) found *m/z* 342.1490 [M + H]<sup>+</sup>, calcd for C<sub>23</sub>H<sub>20</sub>NO<sub>2</sub> 342.1494. Physical and spectral properties of this material were identical to those previously reported in the literature.<sup>7</sup>

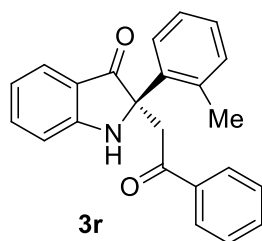

**(R)-2-(2-oxo-2-phenylethyl)-2-(*o*-tolyl)indolin-3-one (3r)**: yellow solid; 30.6 mg; 90% yield; 88% ee, (after recrystallization from petroleum ether/ethyl acetate, mother liquid, 86% yield, 92% ee); [determined by **HPLC** analysis Daicel Chirapak AD-H, *n*-hexane/*i*-PrOH = 60/40, 254 nm UV detector, 1.0 mL/min,  $t_R$  = 9.0 min (major) and  $t_R$  = 18.6 min (minor)]; m.p.: 185–187 °C;  $[\alpha]_D^{20}$  – 42.6 (*c* 1.0, CH<sub>2</sub>Cl<sub>2</sub>); **<sup>1</sup>H NMR** (400 MHz, CDCl<sub>3</sub>) δ 8.01 (dd, *J* = 8.3, 1.2 Hz, 2H), 7.69 (d, *J* = 7.8 Hz, 1H), 7.66 – 7.59 (m, 1H), 7.50 (dd, *J* = 11.2, 4.3 Hz, 3H), 7.19 – 7.13 (m, 1H), 7.13 – 7.03 (m, 3H), 6.92 (d, *J* = 8.3 Hz, 1H), 6.89 – 6.81 (m, 1H), 6.52 (s, br, 1H), 4.41 (d, *J* = 18.1 Hz, 1H), 3.01 (d, *J* = 18.1 Hz, 1H), 2.13 (s, 3H); **<sup>13</sup>C NMR** (100 MHz, CDCl<sub>3</sub>) δ 202.1, 198.6, 159.5, 137.8, 137.5, 136.5, 135.6, 134.2, 132.5, 129.0, 128.3, 128.3, 128.1, 125.9, 125.1, 119.5, 119.0,

112.6, 71.6, 43.8, 20.9; **IR (KBr)**  $\nu$  3380, 2961, 2923, 2853, 1696, 1620, 1220, 1063, 744  $\text{cm}^{-1}$ ; **HRMS (ESI)** found  $m/z$  342.1487  $[\text{M} + \text{H}]^+$ , calcd for  $\text{C}_{23}\text{H}_{20}\text{NO}_2$  342.1494.

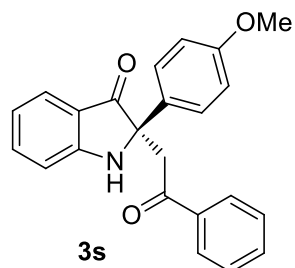

**(R)-2-(4-methoxyphenyl)-2-(2-oxo-2-phenylethyl)indolin-3-one (3s)**: yellow solid; 32.8 mg; 92% yield; 93% ee, (after recrystallization from petroleum ether/ethyl acetate, mother liquid, 92% yield, 93% ee); [determined by **HPLC** analysis Daicel Chirapak AD-H, *n*-hexane/*i*-PrOH = 60/40, 254 nm UV detector, 1.0 mL/min,  $t_R$  = 21.2 min (major) and  $t_R$  = 26.8 min (minor)]; m.p.: 120–122 °C;  $[\alpha]_D^{20}$  – 48.7 (*c* 1.0,  $\text{CH}_2\text{Cl}_2$ );  **$^1\text{H NMR}$**  (400 MHz,  $\text{CDCl}_3$ )  $\delta$  8.10 – 7.80 (m, 2H), 7.57 (t,  $J$  = 7.4 Hz, 2H), 7.52 – 7.40 (m, 5H), 6.95 (d,  $J$  = 8.3 Hz, 1H), 6.83–6.78 (m, 3H), 6.28 (s, br, 1H), 4.40 (d,  $J$  = 17.9 Hz, 1H), 3.73 (s, 3H), 3.14 (d,  $J$  = 17.9 Hz, 1H);  **$^{13}\text{C NMR}$**  (100 MHz,  $\text{CDCl}_3$ )  $\delta$  201.1, 198.1, 160.3, 159.2, 137.8, 136.7, 133.9, 130.1, 128.9, 128.2, 126.6, 125.8, 118.9, 118.3, 114.2, 111.9, 69.0, 55.3, 44.7; **IR (KBr)**  $\nu$  3393, 2965, 2850, 1692, 1620, 1323, 1222, 751  $\text{cm}^{-1}$ ; **HRMS (ESI)** found  $m/z$  358.1448  $[\text{M} + \text{H}]^+$ , calcd for  $\text{C}_{23}\text{H}_{20}\text{NO}_3$  358.1443. Physical and spectral properties of this material were identical to those previously reported in the literature.<sup>7</sup>

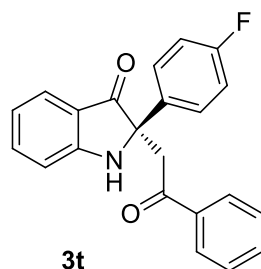

**(R)-2-(4-fluorophenyl)-2-(2-oxo-2-phenylethyl)indolin-3-one (3t)**: yellow solid; 33.6 mg; 85% yield; 81% ee, (after recrystallization from petroleum ether/ethyl acetate, mother liquid, 73% yield, 96% ee); [determined by **HPLC** analysis Daicel Chirapak OD-H, *n*-hexane/*i*-PrOH = 95/5, 254 nm UV detector, 1.0 mL/min,  $t_R$  = 30.1 min (minor) and  $t_R$  = 40.2 min (major)]; m.p.: 163–165 °C;  $[\alpha]_D^{20}$  – 44.8 (*c* 1.0,  $\text{CH}_2\text{Cl}_2$ );  **$^1\text{H NMR}$**  (400 MHz,  $\text{CDCl}_3$ )  $\delta$  7.91 (d,  $J$  = 7.5 Hz, 2H), 7.72 – 7.34 (m, 7H), 7.02 – 6.87 (m, 3H), 6.82 (t,  $J$  = 7.4 Hz, 1H), 6.33 (s, br, 1H), 4.39 (d,  $J$  = 17.9 Hz, 1H), 3.15 (d,  $J$  = 17.9 Hz, 1H);  **$^{13}\text{C NMR}$**  (100 MHz,  $\text{CDCl}_3$ )  $\delta$  200.7, 198.0, 162.4 (d,  $J$  = 246.3 Hz), 160.2, 138.1, 136.6, 134.0, 133.9 (d,  $J$  = 3.2 Hz), 128.9, 128.2, 127.3 (d,  $J$  = 8.3 Hz), 125.8, 119.2, 118.1, 115.6 (d,  $J$  = 21.6 Hz), 112.0, 68.9, 45.0; **IR (KBr)**  $\nu$  3430, 2927, 2900, 2853, 1689, 1615, 1353, 1232, 749  $\text{cm}^{-1}$ ; **HRMS (ESI)** 346.1238  $[\text{M} + \text{H}]^+$ , calcd for  $\text{C}_{22}\text{H}_{17}\text{FNO}_2$  346.1243.

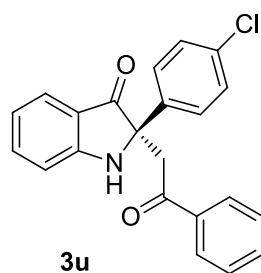

**(R)-2-(4-chlorophenyl)-2-(2-oxo-2-phenylethyl)indolin-3-one (3u):** yellow solid; 29.6 mg; 82% yield; 76% ee, (after recrystallization from petroleum ether/ethyl acetate, mother liquid, 69% yield, 93% ee); [determined by **HPLC** analysis Daicel Chirapak AD-H, *n*-hexane/*i*-PrOH = 60/40, 254 nm UV detector, 1.0 mL/min,  $t_R = 14.7$  min (major) and  $t_R = 17.0$  min (minor)]; m.p.: 151–153 °C;  $[\alpha]_D^{20} - 43.3$  (*c* 1.0, CH<sub>2</sub>Cl<sub>2</sub>); **<sup>1</sup>H NMR** (400 MHz, CDCl<sub>3</sub>)  $\delta$  8.02 – 7.81 (m, 2H), 7.59 (dt, *J* = 7.4, 3.5 Hz, 2H), 7.52 (d, *J* = 8.7 Hz, 2H), 7.50 – 7.38 (m, 3H), 7.25 (d, *J* = 8.8 Hz, 2H), 6.97 (d, *J* = 8.3 Hz, 1H), 6.82 (t, *J* = 7.4 Hz, 1H), 6.31 (s, br, 1H), 4.39 (d, *J* = 18.0 Hz, 1H), 3.15 (d, *J* = 18.0 Hz, 1H); **<sup>13</sup>C NMR** (100 MHz, CDCl<sub>3</sub>)  $\delta$  200.3, 197.8, 160.2, 138.1, 136.8, 136.5, 134.1, 133.7, 128.9, 128.9, 128.2, 127.0, 125.8, 119.2, 118.0, 112.0, 68.9, 44.9; **IR (KBr)**  $\nu$  3387, 2957, 2920, 2853, 1686, 1603, 759 cm<sup>-1</sup>; **HRMS** (ESI) found *m/z* 362.0943 [M + H]<sup>+</sup>, calcd for C<sub>22</sub>H<sub>17</sub>ClNO<sub>2</sub> 362.0948. Physical and spectral properties of this material were identical to those previously reported in literature.<sup>7</sup>

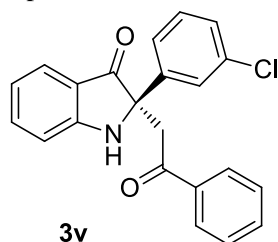

**(R)-2-(3-chlorophenyl)-2-(2-oxo-2-phenylethyl)indolin-3-one (3v):** yellow solid; 29.9 mg; 83% yield; 81% ee, (after recrystallization from petroleum ether/ethyl acetate, mother liquid, 72% yield, 94% ee); [determined by **HPLC** analysis Daicel Chirapak AD-H, *n*-hexane/*i*-PrOH = 60/40, 254 nm UV detector, 1.0 mL/min,  $t_R = 8.9$  min (major) and  $t_R = 13.6$  min (minor)]; m.p.: 118–120 °C;  $[\alpha]_D^{20} - 46.2$  (*c* 1.0, CH<sub>2</sub>Cl<sub>2</sub>); **<sup>1</sup>H NMR** (400 MHz, CDCl<sub>3</sub>)  $\delta$  7.95 – 7.87 (m, 2H), 7.58 (t, *J* = 5.8 Hz, 3H), 7.54 – 7.40 (m, 4H), 7.25 – 7.14 (m, 2H), 6.97 (d, *J* = 8.3 Hz, 1H), 6.83 (t, *J* = 7.4 Hz, 1H), 6.29 (s, br, 1H), 4.38 (d, *J* = 18.0 Hz, 1H), 3.17 (d, *J* = 18.0 Hz, 1H); **<sup>13</sup>C NMR** (100 MHz, CDCl<sub>3</sub>)  $\delta$  200.1, 197.7, 160.2, 140.4, 138.2, 136.5, 134.7, 134.1, 130.0, 128.9, 128.2, 127.9, 125.9, 125.8, 123.8, 119.3, 118.0, 112.1, 68.9, 45.0; **IR (KBr)**  $\nu$  3381, 2961, 2926, 2859, 1695, 1615, 753 cm<sup>-1</sup>; **HRMS** (ESI) found *m/z* 362.0939 [M + H]<sup>+</sup>, calcd for C<sub>22</sub>H<sub>17</sub>ClNO<sub>2</sub> 362.0948.

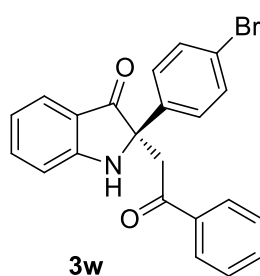

**(R)-2-(4-bromophenyl)-2-(2-oxo-2-phenylethyl)indolin-3-one (3w):** yellow solid; 32.4 mg; 80% yield; 75% ee, (after recrystallization from petroleum ether/ethyl acetate, mother liquid, 65% yield, 93% ee); [determined by **HPLC** analysis Daicel Chirapak AD-H, *n*-hexane/*i*-PrOH = 80/20, 254 nm UV detector, 0.8 mL/min,  $t_R = 40.3$  min (major) and  $t_R = 45.4$  min (minor)]; m.p.: 157–159 °C;  $[\alpha]_D^{20} - 39.6$  (*c* 1.0, CH<sub>2</sub>Cl<sub>2</sub>); **<sup>1</sup>H NMR** (400 MHz, CDCl<sub>3</sub>)  $\delta$  7.93 – 7.83 (m, 2H), 7.57 (dd, *J* = 13.2, 7.3 Hz, 2H), 7.52 – 7.35 (m, 7H), 6.95 (d, *J* = 8.3 Hz, 1H), 6.82 (t, *J* = 7.4 Hz, 1H), 6.41 (s, br, 1H), 4.39 (d, *J* = 18.1 Hz, 1H), 3.17 (d, *J* = 18.1 Hz, 1H); **<sup>13</sup>C NMR** (100 MHz, CDCl<sub>3</sub>)  $\delta$  200.3, 197.8, 160.2, 138.2, 137.4, 136.5, 134.1, 131.9, 129.0, 128.2, 127.4, 125.8, 121.9, 119.3, 118.0, 112.0, 69.0, 44.9 cm<sup>-1</sup>; **IR (KBr)**  $\nu$  3390, 2965, 2910, 2852, 1701, 1610, 750 cm<sup>-1</sup>; **HRMS**

(ESI) found  $m/z$  406.0441  $[M + H]^+$ , calcd for  $C_{22}H_{17}BrNO_2$  406.0443.

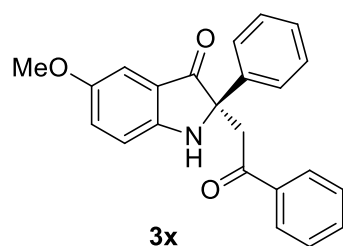

**(R)-5-methoxy-2-(2-oxo-2-phenylethyl)-2-phenylindolin-3-one (3x):** yellow solid; 33.5 mg; 94% yield; 91% ee, (after recrystallization from petroleum ether/ethyl acetate, mother liquid, 94% yield, 91% ee); [determined by **HPLC** analysis Daicel Chirapak AD-H, *n*-hexane/*i*-PrOH = 60/40, 254 nm UV detector, 1.0 mL/min,  $t_R$  = 13.4 min (major) and  $t_R$  = 18.7 min (minor)]; m.p.: 156–158 °C;  $[\alpha]_D^{20}$  – 43.5 (*c* 1.0,  $CH_2Cl_2$ );  **$^1H$  NMR** (400 MHz,  $CDCl_3$ )  $\delta$  8.09 – 7.80 (m, 2H), 7.61 – 7.53 (m, 3H), 7.44 (t,  $J$  = 7.7 Hz, 2H), 7.29 (dd,  $J$  = 10.2, 4.8 Hz, 2H), 7.25 – 7.15 (m, 2H), 7.01 (d,  $J$  = 2.6 Hz, 1H), 6.94 (d,  $J$  = 8.8 Hz, 1H), 6.02 (s, br, 1H), 4.41 (d,  $J$  = 17.8 Hz, 1H), 3.76 (s, 3H), 3.21 (d,  $J$  = 17.8 Hz, 1H);  **$^{13}C$  NMR** (100 MHz,  $CDCl_3$ )  $\delta$  201.0, 197.9, 156.3, 153.5, 138.4, 136.7, 133.8, 128.9, 128.8, 128.6, 128.3, 127.7, 125.5, 118.5, 113.5, 105.4, 70.4, 55.9, 45.0; **IR (KBr)**  $\nu$  3396, 2961, 2910, 2854, 1688, 1610, 1600, 742  $cm^{-1}$ ; **HRMS** (ESI) found  $m/z$  358.1448  $[M + H]^+$ , calcd for  $C_{23}H_{20}NO_3$  358.1443.

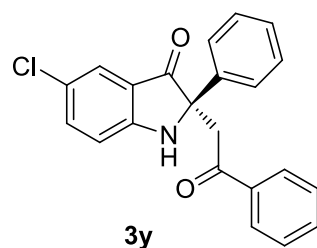

**(R)-5-chloro-2-(2-oxo-2-phenylethyl)-2-phenylindolin-3-one (3y):** yellow solid; 30.6 mg; 85% yield; 82% ee, (after recrystallization from petroleum ether/ethyl acetate, mother liquid, 80% yield, 88% ee); [determined by **HPLC** analysis Daicel Chirapak OD-H, *n*-hexane/*i*-PrOH = 70/30, 254 nm UV detector, 1.0 mL/min,  $t_R$  = 11.9 min (minor) and  $t_R$  = 14.8 min (major)]; m.p.: 148–150 °C;  $[\alpha]_D^{20}$  – 39.2 (*c* 1.0,  $CH_2Cl_2$ );  **$^1H$  NMR** (400 MHz,  $CDCl_3$ )  $\delta$  8.04 – 7.75 (m, 2H), 7.58 (t,  $J$  = 7.4 Hz, 1H), 7.52 (d,  $J$  = 7.7 Hz, 3H), 7.48 – 7.41 (m, 3H), 7.29 (t,  $J$  = 7.4 Hz, 2H), 7.23 (dd,  $J$  = 8.3, 6.2 Hz, 1H), 6.92 (d,  $J$  = 8.7 Hz, 1H), 6.32 (s, br, 1H), 4.42 (d,  $J$  = 17.9 Hz, 1H), 3.20 (d,  $J$  = 17.9 Hz, 1H);  **$^{13}C$  NMR** (100 MHz,  $CDCl_3$ )  $\delta$  199.7, 197.7, 158.6, 137.8, 137.6, 136.5, 134.0, 129.0, 128.9, 128.2, 127.9, 125.4, 124.9, 124.2, 119.4, 113.1, 70.2, 44.8; **IR (KBr)**  $\nu$  3380, 2961, 2912, 1702, 1688, 1610, 748  $cm^{-1}$ ; **HRMS** (ESI) found  $m/z$  362.0947  $[M + H]^+$ , calcd for  $C_{22}H_{17}ClNO_2$  362.0948. Physical and spectral properties of this material were identical to those previously reported in literature.<sup>7</sup>

**General procedure for the reaction of 1'-tosyl-1'*H*,3*H*-[2,3'-biindol]-3-ones 5 with simple ketones 2**

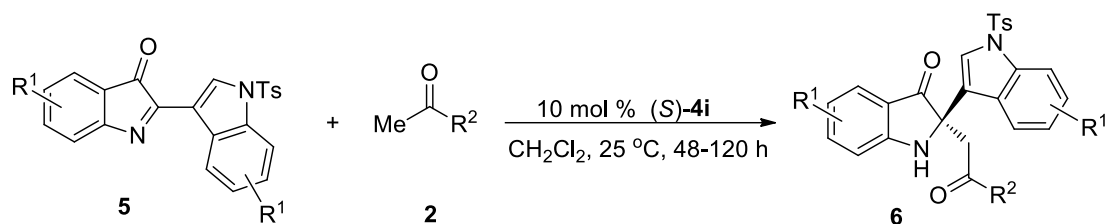

To a 10 mL Schlenk flask equipped with a stirring bar was added 1'-tosyl-1*H*,3*H*-[2,3'-biindol]-3-ones **5** (0.1 mmol), chiral phosphoric acid (*S*)-**4i** (0.01 mmol, 10 mol %), CH<sub>2</sub>Cl<sub>2</sub> (1 mL). Simple ketones **2** (1.0 mmol, 10.0 equiv) was added to the mixture. Then the resulting mixture was stirred at room temperature until the completion of the reaction (monitored by TLC), concentrated under vacuum, and the residue was purified by flash chromatography on silica gel (eluting with petroleum ether/ethyl acetate = 2/1) to give the desired product **6**.

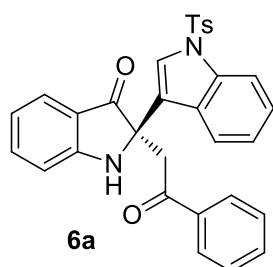

**(*R*)-2-(2-oxo-2-phenylethyl)-2-(1-tosyl-1*H*-indol-3-yl)indolin-3-one (6a)**: yellow solid; 44.7 mg; 86% yield; 93% ee; [determined by HPLC analysis Daicel Chirapak IA, *n*-hexane/*i*-PrOH = 60/40, 254 nm UV detector, 1.0 mL/min,  $t_R$  = 17.2 min (major) and  $t_R$  = 25.6 min (minor)]; m.p.: 209–212 °C;  $[\alpha]_D^{20}$  – 22.4 (*c* 1.0, CH<sub>2</sub>Cl<sub>2</sub>); <sup>1</sup>H NMR (400 MHz, CDCl<sub>3</sub>) δ 7.88 (t, *J* = 7.5 Hz, 3H), 7.71 (d, *J* = 7.9 Hz, 1H), 7.63 (d, *J* = 6.5 Hz, 4H), 7.60 – 7.49 (m, 2H), 7.43 (t, *J* = 7.7 Hz, 2H), 7.22 (t, *J* = 7.7 Hz, 1H), 7.13 (t, *J* = 7.9 Hz, 3H), 6.96 (d, *J* = 8.2 Hz, 1H), 6.86 (t, *J* = 7.4 Hz, 1H), 6.31 (s, br, 1H), 4.38 (d, *J* = 17.5 Hz, 1H), 3.24 (d, *J* = 17.5 Hz, 1H), 2.30 (s, 3H); <sup>13</sup>C NMR (100 MHz, CDCl<sub>3</sub>) δ 200.3, 197.5, 160.1, 145.0, 138.1, 136.5, 135.7, 134.9, 134.0, 129.9, 128.9, 128.3, 128.2, 126.9, 125.6, 124.8, 124.6, 123.5, 121.6, 120.5, 119.3, 118.9, 113.8, 112.4, 66.8, 43.9, 21.7; IR (KBr) ν 3390, 3152, 2940, 2919, 2716, 1720, 1616, 1368, 1173, 755 cm<sup>-1</sup>; HRMS (ESI) found *m/z* 521.1528 [M + H]<sup>+</sup>, calcd for C<sub>31</sub>H<sub>25</sub>N<sub>2</sub>O<sub>4</sub>S 521.1535.

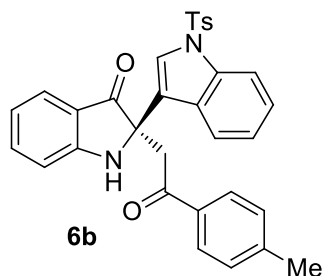

**(*R*)-2-(2-oxo-2-(*p*-tolyl)ethyl)-2-(1-tosyl-1*H*-indol-3-yl)indolin-3-one (6b)**: yellow solid; 49.1 mg; 92% yield; 90% ee; [determined by HPLC analysis Daicel Chirapak IA, *n*-hexane/*i*-PrOH = 60/40, 254 nm UV detector, 1.0 mL/min,  $t_R$  = 21.0 min (major) and  $t_R$  = 31.5 min (minor)]; m.p.: 252–253 °C;  $[\alpha]_D^{20}$  – 25.3 (*c* 1.0, CH<sub>2</sub>Cl<sub>2</sub>); <sup>1</sup>H NMR (400 MHz, CDCl<sub>3</sub>) δ 7.86 (d, *J* = 8.3 Hz, 1H), 7.80 (d, *J* = 8.1 Hz, 2H), 7.69 (d, *J* = 8.0 Hz, 1H), 7.62 (dd, *J* = 11.3, 2.9 Hz, 4H), 7.53 (t, *J* = 7.6 Hz, 1H), 7.23 (dd, *J* = 16.5, 8.5 Hz, 3H), 7.13 (dd, *J* = 12.1, 7.9 Hz, 3H), 6.96 (d, *J* = 8.2 Hz, 1H),

6.85 (t,  $J = 7.4$  Hz, 1H), 6.35 (s, br, 1H), 4.35 (d,  $J = 17.5$  Hz, 1H), 3.18 (d,  $J = 17.4$  Hz, 1H), 2.40 (s, 3H), 2.31 (s, 3H);  $^{13}\text{C}$  NMR (100 MHz,  $\text{CDCl}_3$ )  $\delta$  200.4, 197.2, 160.1, 145.0, 145.0, 138.1, 135.7, 135.0, 134.1, 129.9, 129.6, 128.4, 126.9, 125.6, 124.8, 124.6, 123.5, 121.6, 120.6, 119.3, 119.0, 113.8, 112.5, 66.9, 43.7, 21.8, 21.7; IR (KBr)  $\nu$  3388, 3142, 2956, 2923, 2726, 1722, 1611, 1362, 1170, 751  $\text{cm}^{-1}$ ; HRMS (ESI) found  $m/z$  535.1687  $[\text{M} + \text{H}]^+$ , calcd for  $\text{C}_{32}\text{H}_{27}\text{N}_2\text{O}_4\text{S}$  535.1692.

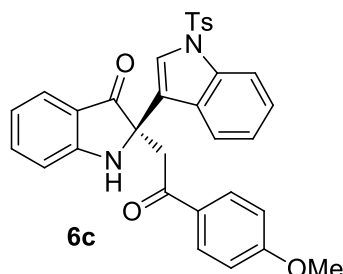

**(R)-2-(2-(4-methoxyphenyl)-2-oxoethyl)-2-(1-tosyl-1H-indol-3-yl)indolin-3-one (6c):** yellow solid; 49.5 mg; 90% yield; 99% ee; [determined by HPLC analysis Daicel Chirapak IA, *n*-hexane/*i*-PrOH = 60/40, 254 nm UV detector, 1.0 mL/min,  $t_R = 29.7$  min (major) and  $t_R = 49.5$  min (minor)]; m.p.: 239–241 °C;  $[\alpha]_D^{20} - 21.6$  ( $c$  1.0,  $\text{CH}_2\text{Cl}_2$ );  $^1\text{H}$  NMR (400 MHz,  $\text{CDCl}_3$ )  $\delta$  7.87 (t,  $J = 9.4$  Hz, 3H), 7.69 (d,  $J = 8.0$  Hz, 1H), 7.62 (dd,  $J = 7.5, 5.6$  Hz, 4H), 7.57 – 7.46 (m, 1H), 7.21 (t,  $J = 7.4$  Hz, 1H), 7.18 – 7.08 (m, 3H), 6.96 (d,  $J = 8.3$  Hz, 1H), 6.90 (d,  $J = 8.9$  Hz, 2H), 6.85 (t,  $J = 7.4$  Hz, 1H), 6.39 (s, br, 1H), 4.32 (d,  $J = 17.2$  Hz, 1H), 3.86 (s, 3H), 3.14 (d,  $J = 17.2$  Hz, 1H), 2.31 (s, 3H);  $^{13}\text{C}$  NMR (100 MHz,  $\text{CDCl}_3$ )  $\delta$  200.5, 196.0, 164.2, 160.2, 145.0, 138.1, 135.7, 135.0, 130.6, 129.9, 129.7, 128.4, 126.9, 125.6, 124.8, 124.7, 123.5, 121.7, 120.6, 119.3, 119.0, 114.1, 113.8, 112.5, 67.0, 55.7, 43.4, 21.7; IR (KBr)  $\nu$  3380, 3162, 2940, 2859, 1698, 1610, 1328, 747  $\text{cm}^{-1}$ ; HRMS (ESI) found  $m/z$  551.1644  $[\text{M} + \text{H}]^+$ , calcd for  $\text{C}_{32}\text{H}_{27}\text{N}_2\text{O}_5\text{S}$  551.1641.

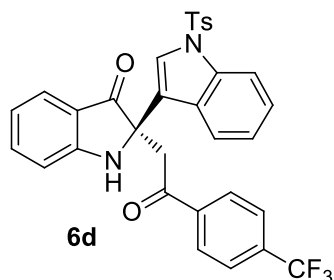

**(R)-2-(2-oxo-2-(4-(trifluoromethyl)phenyl)ethyl)-2-(1-tosyl-1H-indol-3-yl)indolin-3-one (6d):** yellow solid; 51.1 mg; 87% yield; 90% ee; [determined by HPLC analysis Daicel Chirapak IA, *n*-hexane/*i*-PrOH = 60/40, 254 nm UV detector, 1.0 mL/min,  $t_R = 20.8$  min (major) and  $t_R = 28.7$  min (minor)]; m.p.: 189–191 °C;  $[\alpha]_D^{20} - 24.0$  ( $c$  1.0,  $\text{CH}_2\text{Cl}_2$ );  $^1\text{H}$  NMR (400 MHz,  $\text{CDCl}_3$ )  $\delta$  7.95 (d,  $J = 8.1$  Hz, 2H), 7.87 (d,  $J = 8.3$  Hz, 1H), 7.74 (d,  $J = 7.9$  Hz, 1H), 7.69 – 7.60 (m, 6H), 7.54 (ddd,  $J = 8.3, 7.2, 1.3$  Hz, 1H), 7.25 – 7.21 (m, 1H), 7.15 (dd,  $J = 10.9, 4.4$  Hz, 3H), 6.97 (d,  $J = 8.2$  Hz, 1H), 6.88 (dd,  $J = 11.0, 3.8$  Hz, 1H), 6.14 (s, br, 1H), 4.36 (d,  $J = 17.5$  Hz, 1H), 3.33 (d,  $J = 17.5$  Hz, 1H), 2.31 (s, 1H);  $^{13}\text{C}$  NMR (100 MHz,  $\text{CDCl}_3$ )  $\delta$  200.0, 196.6, 160.1, 145.2, 139.1, 138.2 (d,  $J = 3.2$  Hz), 135.8, 135.2, 134.9 (d,  $J = 7.5$  Hz), 130.0, 128.5, 128.0, 126.9, 125.9 (q,  $J = 3.7$  Hz), 125.6, 125.0, 124.5, 123.6, 121.6, 120.2, 119.6, 119.1, 113.9, 112.5, 66.6, 44.5, 21.7; IR (KBr)  $\nu$  3380, 3162, 3065, 2970, 2739, 1691, 1613, 1321, 757  $\text{cm}^{-1}$ ; HRMS (ESI) found  $m/z$  589.1410  $[\text{M} + \text{H}]^+$ , calcd for  $\text{C}_{32}\text{H}_{24}\text{F}_3\text{N}_2\text{O}_4\text{S}$  589.1409.



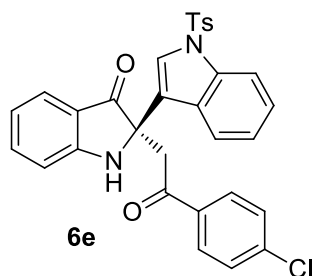

**(R)-2-(2-(4-chlorophenyl)-2-oxoethyl)-2-(1-tosyl-1H-indol-3-yl)indolin-3-one (6e):** yellow solid; 52.0 mg; 94% yield; 93% ee; [determined by **HPLC** analysis Daicel Chirapak IA, *n*-hexane/*i*-PrOH = 60/40, 254 nm UV detector, 1.0 mL/min,  $t_R = 24.3$  min (major) and  $t_R = 40.6$  min (minor)]; m.p.: 228–230 °C;  $[\alpha]_D^{20} - 32.2$  (*c* 1.0, CH<sub>2</sub>Cl<sub>2</sub>); **<sup>1</sup>H NMR** (400 MHz, CDCl<sub>3</sub>) δ 7.87 (d, *J* = 8.3 Hz, 1H), 7.80 (d, *J* = 8.6 Hz, 2H), 7.72 (d, *J* = 8.0 Hz, 1H), 7.67 – 7.59 (m, 4H), 7.56 – 7.48 (m, 1H), 7.38 (d, *J* = 8.6 Hz, 2H), 7.23 (dd, *J* = 12.0, 4.6 Hz, 1H), 7.14 (t, *J* = 7.7 Hz, 3H), 6.96 (d, *J* = 8.2 Hz, 1H), 6.86 (t, *J* = 7.4 Hz, 1H), 6.22 (s, br, 1H), 4.31 (d, *J* = 17.4 Hz, 1H), 3.24 (d, *J* = 17.4 Hz, 1H), 2.31 (s, 1H); **<sup>13</sup>C NMR** (100 MHz, CDCl<sub>3</sub>) δ 200.1, 196.3, 160.1, 145.1, 140.5, 138.1, 135.8, 135.0, 134.8, 130.0, 129.6, 129.2, 128.2, 126.9, 125.6, 124.9, 124.6, 123.5, 121.6, 120.3, 119.5, 119.0, 113.9, 112.5, 66.8, 44.0, 21.7; **IR (KBr)** ν 3390, 3152, 2960, 2853, 1671, 1324, 745 cm<sup>-1</sup>; **HRMS** (ESI) found *m/z* 555.1147 [M + H]<sup>+</sup>, calcd for C<sub>31</sub>H<sub>24</sub>ClN<sub>2</sub>O<sub>4</sub>S 555.1145.

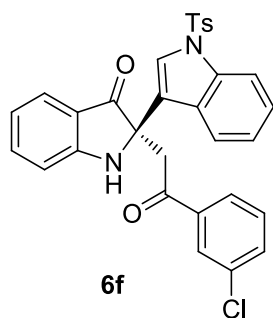

**(R)-2-(2-(3-chlorophenyl)-2-oxoethyl)-2-(1-tosyl-1H-indol-3-yl)indolin-3-one (6f):** yellow solid; 47.6 mg; 86% yield; 92% ee; [determined by **HPLC** analysis Daicel Chirapak IA, *n*-hexane/*i*-PrOH = 60/40, 254 nm UV detector, 1.0 mL/min,  $t_R = 14.8$  min (major) and  $t_R = 20.0$  min (minor)]; m.p.: 100–103 °C;  $[\alpha]_D^{20} - 34.2$  (*c* 1.0, CH<sub>2</sub>Cl<sub>2</sub>); **<sup>1</sup>H NMR** (400 MHz, CDCl<sub>3</sub>) δ 7.88 (d, *J* = 8.3 Hz, 1H), 7.82 (s, 1H), 7.77 – 7.70 (m, 2H), 7.63 (dd, *J* = 10.4, 5.9 Hz, 4H), 7.57 – 7.48 (m, 2H), 7.37 (t, *J* = 7.9 Hz, 1H), 7.30 – 7.20 (m, 1H), 7.15 (t, *J* = 8.3 Hz, 3H), 6.96 (d, *J* = 8.2 Hz, 1H), 6.87 (t, *J* = 7.4 Hz, 1H), 6.19 (s, br, 1H), 4.32 (d, *J* = 17.5 Hz, 1H), 3.25 (d, *J* = 17.5 Hz, 1H), 2.31 (s, 1H); **<sup>13</sup>C NMR** (100 MHz, CDCl<sub>3</sub>) δ 200.0, 196.3, 160.0, 145.1, 138.2, 138.0, 135.8, 135.3, 134.9, 133.9, 130.2, 130.0, 128.2, 128.1, 126.9, 126.3, 125.6, 124.9, 124.6, 123.6, 121.6, 120.3, 119.5, 119.0, 113.9, 112.4, 66.7, 44.2, 21.7; **IR (KBr)** ν 3384, 2955, 2920, 2850, 1681, 1334, 1151, 705 cm<sup>-1</sup>; **HRMS** (ESI) found *m/z* 555.1137 [M + H]<sup>+</sup>, calcd for C<sub>31</sub>H<sub>24</sub>ClN<sub>2</sub>O<sub>4</sub>S 555.1145.

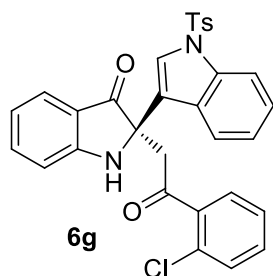

**(R)-2-(2-(2-chlorophenyl)-2-oxoethyl)-2-(1-tosyl-1H-indol-3-yl)indolin-3-one (6g):** yellow solid; 35.9 mg; 65% yield; 97% ee; [determined by HPLC analysis Daicel Chirapak OD-H, *n*-hexane/*i*-PrOH = 70/30, 254 nm UV detector, 1.0 mL/min,  $t_R$  = 13.5 min (major) and  $t_R$  = 18.6 min (minor)]; m.p.: 91–93 °C;  $[\alpha]_D^{20}$  – 26.4 (*c* 1.0, CH<sub>2</sub>Cl<sub>2</sub>); <sup>1</sup>H NMR (400 MHz, CDCl<sub>3</sub>) δ 7.86 (d, *J* = 8.3 Hz, 1H), 7.70 (dd, *J* = 8.1, 4.4 Hz, 3H), 7.64 (s, 1H), 7.61 (d, *J* = 7.8 Hz, 1H), 7.58 – 7.50 (m, 1H), 7.36 – 7.26 (m, 2H), 7.20 (dd, *J* = 12.9, 7.8 Hz, 3H), 7.13 – 7.05 (m, 2H), 7.04 – 6.97 (m, 2H), 6.87 (t, *J* = 7.3 Hz, 1H), 6.16 (s, br, 1H), 4.32 (d, *J* = 16.8 Hz, 1H), 3.28 (d, *J* = 16.8 Hz, 1H), 2.31 (s, 3H); <sup>13</sup>C NMR (100 MHz, CDCl<sub>3</sub>) δ 201.0, 199.7, 160.0, 145.2, 138.6, 138.1, 135.8, 135.0, 132.4, 131.1, 130.6, 130.0, 129.1, 128.0, 127.0, 125.6, 124.9, 124.7, 123.4, 121.8, 120.1, 119.6, 119.0, 113.7, 112.6, 67.2, 48.3, 21.7; IR (KBr) ν 3381, 2957, 2916, 2843, 1682, 1330, 1153, 735 cm<sup>-1</sup>; HRMS (ESI) found *m/z* 555.1141 [M + H]<sup>+</sup>, calcd for C<sub>31</sub>H<sub>24</sub>ClN<sub>2</sub>O<sub>4</sub>S 555.1145.

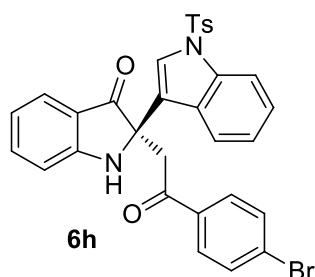

**(R)-2-(2-(4-bromophenyl)-2-oxoethyl)-2-(1-tosyl-1H-indol-3-yl)indolin-3-one (6h):** yellow solid; 57.4 mg; 96% yield; 94% ee; [determined by HPLC analysis Daicel Chirapak IA, *n*-hexane/*i*-PrOH = 60/40, 254 nm UV detector, 1.0 mL/min,  $t_R$  = 26.8 min (minor) and  $t_R$  = 42.1 min (major)]; m.p.: 237–238 °C;  $[\alpha]_D^{20}$  – 26.2 (*c* 1.0, CH<sub>2</sub>Cl<sub>2</sub>); <sup>1</sup>H NMR (400 MHz, CDCl<sub>3</sub>) δ 7.87 (d, *J* = 8.3 Hz, 1H), 7.72 (d, *J* = 8.5 Hz, 3H), 7.68 – 7.59 (m, 4H), 7.58 – 7.48 (m, 3H), 7.29 – 7.21 (m, 1H), 7.14 (t, *J* = 7.8 Hz, 3H), 6.96 (d, *J* = 8.2 Hz, 1H), 6.86 (t, *J* = 7.4 Hz, 1H), 6.20 (s, br, 1H), 4.31 (d, *J* = 17.4 Hz, 1H), 3.23 (d, *J* = 17.4 Hz, 1H), 2.31 (s, 3H); <sup>13</sup>C NMR (100 MHz, CDCl<sub>3</sub>) δ 200.1, 196.5, 160.1, 145.1, 138.1, 135.7, 135.2, 134.9, 132.2, 130.0, 129.7, 129.3, 128.1, 126.9, 125.6, 124.9, 124.5, 123.5, 121.6, 120.3, 119.5, 119.0, 113.9, 112.5, 66.7, 44.0, 21.7; IR (KBr) ν 3389, 2964, 2926, 2833, 1672, 1343, 1129, 755 cm<sup>-1</sup>; HRMS (ESI) found *m/z* 599.0636 [M + H]<sup>+</sup>, calcd for C<sub>31</sub>H<sub>24</sub>BrN<sub>2</sub>O<sub>4</sub>S 599.0640.

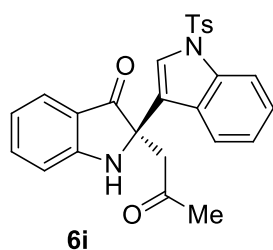

**(R)-2-(2-oxopropyl)-2-(1-tosyl-1H-indol-3-yl)indolin-3-one (6i):** yellow solid; 39.2 mg; 86% yield; 96% ee; [determined by **HPLC** analysis Daicel Chirapak OD-H, *n*-hexane/*i*-PrOH = 80/20, 254 nm UV detector, 1.0 mL/min,  $t_R = 20.7$  min (major) and  $t_R = 33.9$  min (minor)]; m.p.: 116–118 °C;  $[\alpha]_D^{20} - 18.5$  (*c* 1.0, CH<sub>2</sub>Cl<sub>2</sub>); **<sup>1</sup>H NMR** (400 MHz, CDCl<sub>3</sub>)  $\delta$  7.89 (d, *J* = 8.3 Hz, 1H), 7.76 (d, *J* = 8.0 Hz, 1H), 7.69 (d, *J* = 8.4 Hz, 2H), 7.62 (s, 1H), 7.59 (d, *J* = 7.8 Hz, 1H), 7.52 (ddd, *J* = 8.3, 7.3, 1.3 Hz, 1H), 7.30 – 7.22 (m, 1H), 7.17 (dd, *J* = 12.8, 4.7 Hz, 3H), 6.95 (d, *J* = 8.3 Hz, 1H), 6.85 (t, *J* = 7.3 Hz, 1H), 6.11 (s, br, 1H), 3.74 (d, *J* = 17.0 Hz, 1H), 2.78 (d, *J* = 17.0 Hz, 1H), 2.31 (s, 3H), 2.05 (s, 3H); **<sup>13</sup>C NMR** (100 MHz, CDCl<sub>3</sub>)  $\delta$  206.5, 200.0, 160.0, 145.1, 138.1, 135.8, 135.0, 130.0, 128.1, 126.9, 125.5, 124.9, 124.6, 123.5, 121.8, 120.2, 119.5, 118.9, 113.9, 112.6, 66.7, 48.3, 31.5, 21.7; **IR (KBr)**  $\nu$  3385, 3141, 2918, 2862, 1700, 1616, 1368, 1178 cm<sup>-1</sup>; **HRMS** (ESI) found *m/z* 459.1371 [M + H]<sup>+</sup>, calcd for C<sub>26</sub>H<sub>23</sub>N<sub>2</sub>O<sub>4</sub>S 459.1379. Physical and spectral properties of this material were identical to those previously reported in literature.<sup>3</sup>

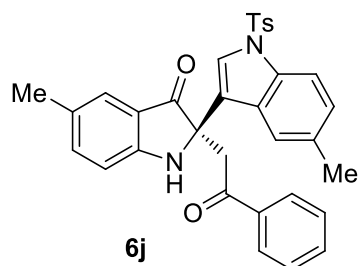

**(R)-5-methyl-2-(5-methyl-1-tosyl-1H-indol-3-yl)-2-(2-oxo-2-phenylethyl)indolin-3-one (6j):** yellow solid; 50.4 mg; 92% yield; 89% ee; [determined by **HPLC** analysis Daicel Chirapak IA, *n*-hexane/*i*-PrOH = 70/30, 254 nm UV detector, 1.0 mL/min,  $t_R = 21.2$  min (major) and  $t_R = 24.1$  min (minor)]; m.p.: 128–131 °C;  $[\alpha]_D^{20} - 19.9$  (*c* 1.0, CH<sub>2</sub>Cl<sub>2</sub>); **<sup>1</sup>H NMR** (400 MHz, CDCl<sub>3</sub>)  $\delta$  7.88 (d, *J* = 7.3 Hz, 2H), 7.75 (d, *J* = 8.5 Hz, 1H), 7.61 (d, *J* = 8.3 Hz, 2H), 7.59 – 7.53 (m, 2H), 7.49 (s, 1H), 7.43 (t, *J* = 7.7 Hz, 3H), 7.36 (dd, *J* = 8.3, 1.4 Hz, 1H), 7.13 (d, *J* = 8.2 Hz, 2H), 7.04 (d, *J* = 8.4 Hz, 1H), 6.88 (d, *J* = 8.3 Hz, 1H), 6.06 (s, br, 1H), 4.34 (d, *J* = 17.5 Hz, 1H), 3.27 (d, *J* = 17.5 Hz, 1H), 2.32 (s, 3H), 2.31 (s, 3H), 2.30 (s, 3H); **<sup>13</sup>C NMR** (100 MHz, CDCl<sub>3</sub>)  $\delta$  200.5, 197.4, 158.6, 144.8, 139.4, 136.6, 135.0, 134.1, 133.9, 133.0, 129.9, 128.9, 128.8, 128.6, 128.2, 126.9, 126.2, 124.8, 124.7, 121.5, 120.6, 119.4, 113.5, 112.5, 67.2, 44.1, 21.7, 20.7; **IR (KBr)**  $\nu$  3405, 3145, 2938, 2861, 1710, 1619, 1373, 1176, 926 cm<sup>-1</sup>; **HRMS** (ESI) found *m/z* 549.1846[M + H]<sup>+</sup>, calcd for C<sub>33</sub>H<sub>29</sub>N<sub>2</sub>O<sub>4</sub>S 549.1848.

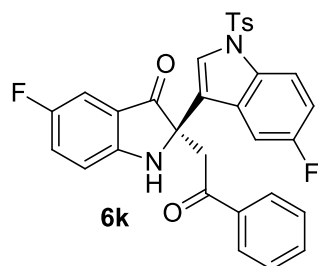

**(R)-5-fluoro-2-(5-fluoro-1-tosyl-1H-indol-3-yl)-2-(2-oxo-2-phenylethyl)indolin-3-one (6k):** yellow solid; 51.7 mg; 93% yield; 97% ee; [determined by **HPLC** analysis Daicel Chirapak IA, *n*-hexane/*i*-PrOH = 70/30, 254 nm UV detector, 1.0 mL/min,  $t_R = 17.3$  min (minor) and  $t_R = 24.0$  min (major)]; m.p.: 113–115 °C;  $[\alpha]_D^{20} - 25.6$  (*c* 1.0, CH<sub>2</sub>Cl<sub>2</sub>); **<sup>1</sup>H NMR** (400 MHz, CDCl<sub>3</sub>)  $\delta$  7.87 (d, *J* = 7.3 Hz, 2H), 7.81 (dd, *J* = 9.1, 4.5 Hz, 1H), 7.68 (s, 1H), 7.59 (dd, *J* = 14.0, 7.9 Hz, 3H), 7.48 – 7.39 (m, 3H), 7.29 (ddd, *J* = 10.9, 8.6, 3.4 Hz, 2H), 7.15 (d, *J* = 8.2 Hz, 2H), 6.96 (ddd, *J* =

8.4, 7.8, 3.1 Hz, 2H), 6.22 (s, br, 1H), 4.30 (d,  $J = 17.5$  Hz, 1H), 3.23 (d,  $J = 17.5$  Hz, 1H), 2.31 (s, 3H);  $^{13}\text{C}$  NMR (100 MHz,  $\text{CDCl}_3$ )  $\delta$  199.9, 197.4, 160.7, 158.1 (d,  $J = 41.7$  Hz), 156.7, 155.5, 145.3, 136.3, 134.7, 134.2, 132.1, 130.0, 129.1 (d,  $J = 10.3$  Hz), 129.0, 128.2, 126.9, 126.3 (d,  $J = 25.4$  Hz), 126.3, 120.2 (d,  $J = 4.1$  Hz), 119.3 (d,  $J = 7.4$  Hz), 114.9 (d,  $J = 9.6$  Hz), 113.8 (d,  $J = 7.4$  Hz), 113.2, 112.9, 110.4, 110.2, 107.7, 107.4, 67.8, 43.9, 21.7; IR (KBr)  $\nu$  3409, 2966, 2924, 2850, 2361, 2340, 1753, 1700, 1630, 1492, 1376, 1309, 1260, 1229, 1193, 916, 790  $\text{cm}^{-1}$ ; HRMS (ESI) found  $m/z$  557.1345  $[\text{M} + \text{H}]^+$ , calcd for  $\text{C}_{31}\text{H}_{23}\text{F}_2\text{N}_2\text{O}_4\text{S}$  557.1347.

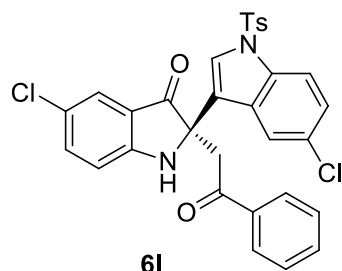

**(R)-5-chloro-2-(5-chloro-1-tosyl-1H-indol-3-yl)-2-(2-oxo-2-phenylethyl)indolin-3-one (6l):** yellow solid; 52.9 mg; 90% yield; 95% ee; [determined by HPLC analysis Daicel Chirapak IA, *n*-hexane/*i*-PrOH = 70/30, 254 nm UV detector, 1.0 mL/min,  $t_R = 15.8$  min (minor) and  $t_R = 22.7$  min (major)]; m.p.: 121–123 °C;  $[\alpha]_D^{20} - 31.8$  ( $c$  1.0,  $\text{CH}_2\text{Cl}_2$ );  $^1\text{H}$  NMR (400 MHz,  $\text{CDCl}_3$ )  $\delta$  7.91 – 7.85 (m, 2H), 7.77 (dd,  $J = 11.7, 5.4$  Hz, 2H), 7.64 (s, 1H), 7.63 – 7.55 (m, 4H), 7.52 – 7.42 (m, 3H), 7.22 – 7.13 (m, 3H), 6.95 (d,  $J = 8.7$  Hz, 1H), 6.32 (s, br, 1H), 4.31 (d,  $J = 17.5$  Hz, 1H), 3.21 (d,  $J = 17.5$  Hz, 1H), 2.32 (s, 3H);  $^{13}\text{C}$  NMR (100 MHz,  $\text{CDCl}_3$ )  $\delta$  198.9, 197.3, 158.2, 145.4, 138.2, 134.6, 134.3, 134.1, 130.1, 129.5, 129.3, 129.0, 128.3, 126.9, 125.9, 125.3, 124.9, 124.8, 121.4, 119.9, 119.6, 114.9, 113.8, 67.6, 44.0, 21.7; IR (KBr)  $\nu$  3409, 2966, 2924, 2850, 1700, 1630, 1376, 1309, 1193, 916, 790  $\text{cm}^{-1}$ ; HRMS (ESI) found  $m/z$  589.0759  $[\text{M} + \text{H}]^+$ , calcd for  $\text{C}_{31}\text{H}_{23}\text{Cl}_2\text{N}_2\text{O}_4\text{S}$  589.0756.

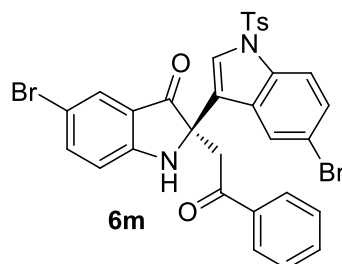

**(R)-5-bromo-2-(5-bromo-1-tosyl-1H-indol-3-yl)-2-(2-oxo-2-phenylethyl)indolin-3-one (6m):** yellow solid; 60.3 mg; 89% yield; 94% ee; [determined by HPLC analysis Daicel Chirapak OD-H, *n*-hexane/*i*-PrOH = 70/30, 254 nm UV detector, 1.0 mL/min,  $t_R = 18.2$  min (minor) and  $t_R = 28.6$  min (major)]; m.p.: 258–260 °C;  $[\alpha]_D^{20} - 36.1$  ( $c$  1.0,  $\text{CH}_2\text{Cl}_2$ );  $^1\text{H}$  NMR (400 MHz,  $\text{CDCl}_3$ )  $\delta$  7.94 (s, 1H), 7.86 (d,  $J = 7.6$  Hz, 2H), 7.74 (d,  $J = 8.9$  Hz, 2H), 7.64 (s, 1H), 7.59 (dd,  $J = 13.4, 7.3$  Hz, 4H), 7.44 (t,  $J = 7.7$  Hz, 2H), 7.33 (dd,  $J = 8.8, 1.4$  Hz, 1H), 7.16 (d,  $J = 8.1$  Hz, 2H), 6.89 (d,  $J = 8.7$  Hz, 1H), 6.35 (s, br, 1H), 4.31 (d,  $J = 17.6$  Hz, 1H), 3.22 (d,  $J = 17.5$  Hz, 1H), 2.32 (s, 1H);  $^{13}\text{C}$  NMR (100 MHz,  $\text{CDCl}_3$ )  $\delta$  198.7, 197.3, 158.5, 145.4, 140.7, 136.2, 134.6, 134.4, 134.2, 130.1, 129.8, 129.0, 128.3, 128.0, 127.9, 126.9, 125.8, 124.5, 120.4, 119.5, 117.2, 115.2, 114.2, 111.6, 67.4, 44.0, 21.7; IR (KBr)  $\nu$  3443, 2956, 2920, 2856, 1705, 1627, 1366, 1194, 923, 750  $\text{cm}^{-1}$ ; HRMS (ESI) found  $m/z$  676.9738  $[\text{M} + \text{H}]^+$ , calcd for  $\text{C}_{31}\text{H}_{23}\text{Br}_2\text{N}_2\text{O}_4\text{S}$  676.9745.

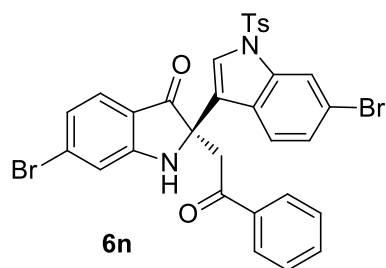

**(R)-6-bromo-2-(6-bromo-1-tosyl-1H-indol-3-yl)-2-(2-oxo-2-phenylethyl)indolin-3-one (6n):** yellow solid; 58.7 mg; 87% yield; 95% ee; [determined by **HPLC** analysis Daicel Chirapak IA, *n*-hexane/*i*-PrOH = 70/30, 254 nm UV detector, 1.0 mL/min,  $t_R$  = 17.2 min (major) and  $t_R$  = 31.2 min (minor)]; m.p.: 148–150 °C;  $[\alpha]_D^{20}$  – 20.8 (*c* 1.0, CH<sub>2</sub>Cl<sub>2</sub>); **<sup>1</sup>H NMR** (400 MHz, CDCl<sub>3</sub>) δ 8.04 (d, *J* = 1.5 Hz, 1H), 7.87 (d, *J* = 7.3 Hz, 2H), 7.67 – 7.54 (m, 5H), 7.45 (t, *J* = 7.9 Hz, 3H), 7.27 (dd, *J* = 8.2, 1.9 Hz, 1H), 7.18 (dd, *J* = 10.0, 4.7 Hz, 3H), 6.99 (dd, *J* = 8.2, 1.4 Hz, 1H), 6.39 (s, br, 1H), 4.32 (d, *J* = 17.6 Hz, 1H), 3.19 (d, *J* = 17.6 Hz, 1H), 2.34 (s, 3H); **<sup>13</sup>C NMR** (100 MHz, CDCl<sub>3</sub>) δ 198.9, 197.4, 160.2, 145.5, 136.4, 136.3, 134.7, 134.3, 133.7, 130.2, 129.0, 128.2, 126.9, 126.7, 125.0, 123.1, 122.8, 119.9, 118.8, 117.6, 116.9, 115.4, 67.1, 43.8, 21.8; **IR (KBr)** ν 3444, 2957, 2848, 1731, 1638, 1363, 1190, 926, 743 cm<sup>-1</sup>; **HRMS** (ESI) found *m/z* 676.9752 [M + H]<sup>+</sup>, calcd for C<sub>31</sub>H<sub>23</sub>Br<sub>2</sub>N<sub>2</sub>O<sub>4</sub>S 676.9745.

#### Scaled-up synthesis and further transformations

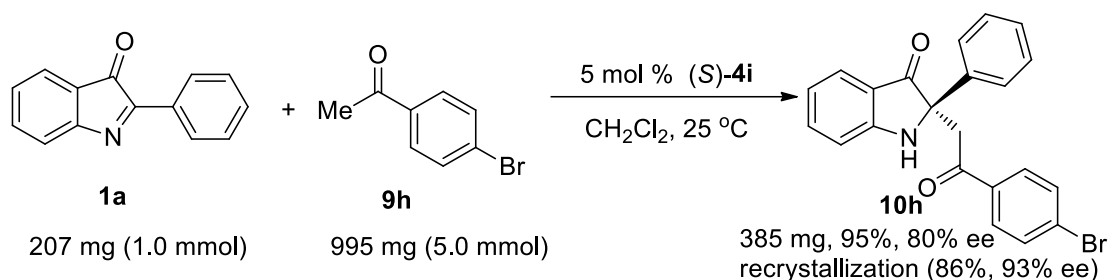

To a 50 mL Schlenk flask equipped with a stirring bar was added 2-phenyl-3H-indol-3-one **1a** (207 mg, 1.0 mmol), chiral phosphoric acid (*S*)-**4i** (43.2 mg, 0.05 mmol, 5 mol %), CH<sub>2</sub>Cl<sub>2</sub> (10 mL). 4'-Bromoacetophenone **2h** (995 mg, 5.0 mmol, 5.0 equiv) was added to the mixture. Then the resulting mixture was stirred at room temperature until the completion of the reaction (monitored by TLC), concentrated under vacuum, and the residue was purified by flash chromatography on silica gel (eluting with petroleum ether/ethyl acetate = 4/1) to give the desired product **3h** (385 mg, 95%, 80% ee), 93% ee after one recrystallization.

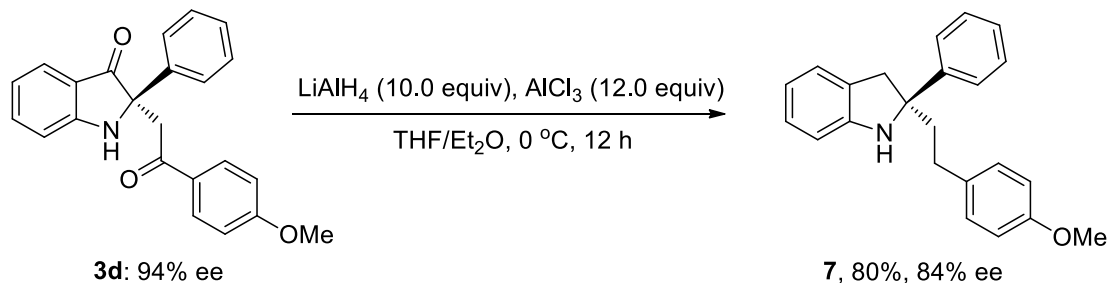

**3d** (53.5 mg, 0.15 mmol) was dissolved to THF/Et<sub>2</sub>O (1/1, 1.5 mL) and LiAlH<sub>4</sub> (56.9 mg, 1.5 mmol) was added to the solution at 0 °C. After being stirred for 1 h, AlCl<sub>3</sub> (finely crushed under N<sub>2</sub> atmosphere, 240.0 mg, 1.8 mmol) was added at 0 °C.<sup>10</sup> After being stirred for 12 h, the reaction was quenched by adding H<sub>2</sub>O. The mixture was extracted with CH<sub>2</sub>Cl<sub>2</sub> three times and the

combined organic phase was dried over  $\text{Na}_2\text{SO}_4$ . After filtration, the filtrate was concentrated under reduced pressure. The residue was purified by column chromatography on silica gel (petroleum ether/ethyl acetate = 10/1) to afford the product **7** (39.5 mg, 80%, 84% ee).

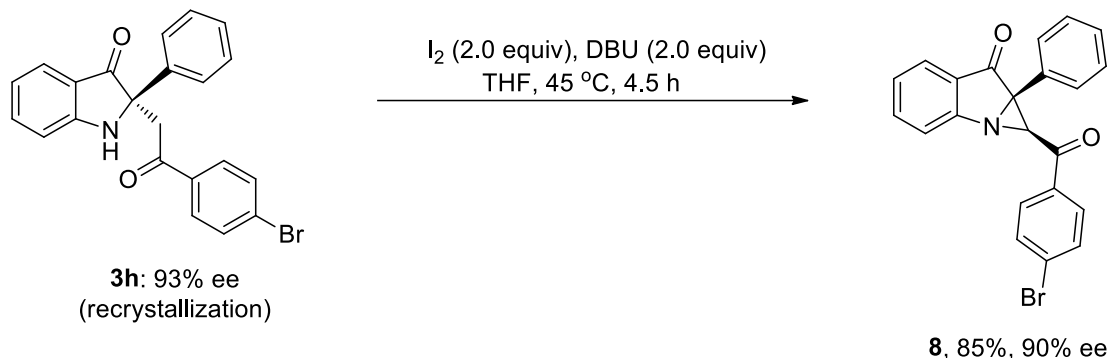

A mixture of **3h** (77.2 mg, 0.19 mmol),  $\text{I}_2$  (98 mg, 0.38 mmol), and DBU (116 mg, 0.76 mmol) was stirred in 1.6 mL of THF at 40 °C for 4.5 h until the disappearance of **3h** as determined by TLC.<sup>7</sup> The reaction mixture was quenched with aqueous  $\text{Na}_2\text{S}_2\text{O}_3$  and extracted with  $\text{CH}_2\text{Cl}_2$  (15 mL  $\times$  3). The organic extracts were dried over  $\text{Na}_2\text{SO}_4$ , filtered, and concentrated to give a residue, which was purified by column chromatography on silica gel (petroleum ether/ethyl acetate = 6/1) to afford the product **8** (65.2 mg, 85%, 90% ee).

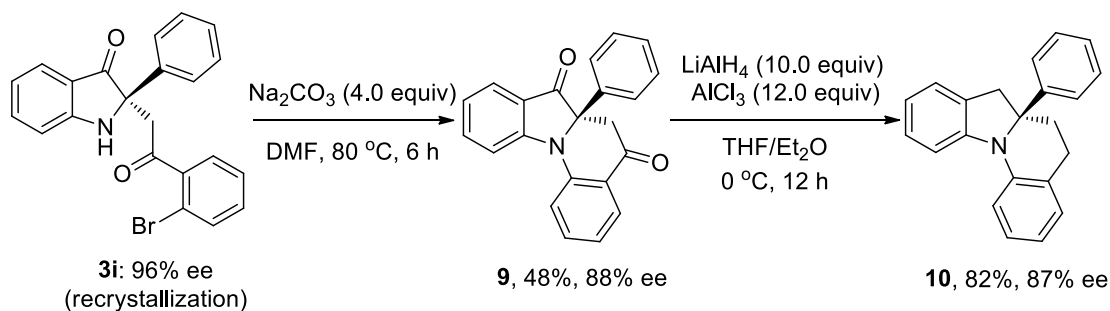

A solution of Mannich adduct **3i** (60.9 mg, 0.15 mmol) (96% ee after one recrystallization from petroleum ether/ethyl acetate),  $\text{Na}_2\text{CO}_3$  (63.6 mg, 0.60 mmol, 4.0 equiv) was stirred in 3.0 mL of DMF at 80 °C for 6 h.<sup>9</sup> Then the reaction was quenched with water, followed by extraction using ethyl acetate (5 mL  $\times$  3), dried over  $\text{Na}_2\text{SO}_4$ , filtered, and concentrated under reduced pressure. The residue was purified by column chromatography (eluting with petroleum ether/ethyl acetate = 5/1) to afford **9** (23.4 mg, 48%, 88% ee) as yellow solid.

Then **9** (23.4 mg, 0.07 mmol) was dissolved to THF/ $\text{Et}_2\text{O}$  (1/1, 1 mL) and  $\text{LiAlH}_4$  (26.7 mg, 0.7 mmol) was added to the solution at 0 °C. After being stirred for 1 h,  $\text{AlCl}_3$  (finely crushed under  $\text{N}_2$  atmosphere, 112.8 mg, 0.85 mmol) was added at 0 °C. After being stirred for 12 h, the reaction was quenched by adding  $\text{H}_2\text{O}$ . The mixture was extracted with  $\text{CH}_2\text{Cl}_2$  three times and the combined organic phase was dried over  $\text{Na}_2\text{SO}_4$ . After filtration, the filtrate was concentrated under reduced pressure. The residue was purified by column chromatography on silica gel (petroleum ether/ethyl acetate = 15/1) to afford the product **10** (16.9 mg, 82%, 87% ee).

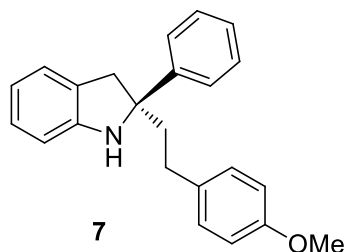

**(S)-2-(4-methoxyphenethyl)-2-phenylindoline (7):** white solid; 39.5 mg; 80% yield; 84% ee; [determined by **HPLC** analysis Daicel Chirapak AD-H, *n*-hexane/*i*-PrOH = 60/40, 254 nm UV detector, 1.0 mL/min,  $t_R$  = 8.7 min (minor) and  $t_R$  = 10.6 min (major)]; m.p.: 52–56 °C;  $[\alpha]_D^{20}$  – 9.8 (*c* 1.0, CH<sub>2</sub>Cl<sub>2</sub>); **<sup>1</sup>H NMR** (400 MHz, CDCl<sub>3</sub>) δ 7.54 (d, *J* = 7.5 Hz, 2H), 7.41 (t, *J* = 7.6 Hz, 2H), 7.29 (t, *J* = 7.3 Hz, 1H), 7.12 – 6.99 (m, 4H), 6.79 (t, *J* = 7.7 Hz, 3H), 6.71 (t, *J* = 7.3 Hz, 1H), 5.59 (brs, 1H), 4.42 (d, *J* = 10.0 Hz, 1H), 3.77 (s, 3H), 3.25 (t, *J* = 16.0 Hz, 2H), 2.50 (dd, *J* = 14.5, 10.9 Hz, 1H), 2.06 (dd, *J* = 14.5, 1.3 Hz, 2H); **<sup>13</sup>C NMR** (100 MHz, CDCl<sub>3</sub>) δ 159.2, 150.4, 146.9, 137.3, 128.6, 127.8, 127.7, 126.9, 126.5, 126.0, 124.7, 118.6, 113.9, 110.1, 72.6, 69.7, 55.4, 49.5, 46.9; **IR (KBr)** ν 3363, 3285, 2905, 2840, 1423, 1347, 1158, 919, 571, 545 cm<sup>-1</sup>; **HRMS (ESI)** found *m/z* 330.1862 [M + H]<sup>+</sup>, calcd for C<sub>23</sub>H<sub>24</sub>NO 330.1858.

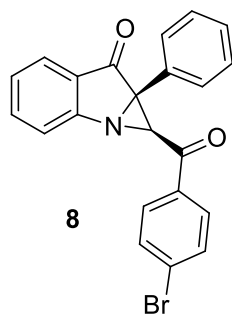

**(1S,7aS)-1-(4-bromobenzoyl)-7a-phenyl-1H-azirino[1,2-a]indol-7(7aH)-one (8):** yellow solid; 65.2 mg; 85% yield; 90% ee; [determined by **HPLC** analysis Daicel Chirapak OD-H, *n*-hexane/*i*-PrOH = 70/30, 254 nm UV detector, 1.0 mL/min,  $t_R$  = 11.1 min (major) and  $t_R$  = 13.1 min (minor)]; m.p.: 158–161 °C;  $[\alpha]_D^{20}$  – 54.3 (*c* 1.0, CH<sub>2</sub>Cl<sub>2</sub>); **<sup>1</sup>H NMR** (400 MHz, CDCl<sub>3</sub>) δ 7.82 (d, *J* = 7.6 Hz, 1H), 7.76 – 7.65 (m, 4H), 7.65 – 7.59 (m, 2H), 7.55 (d, *J* = 8.5 Hz, 2H), 7.40 (t, *J* = 7.2 Hz, 1H), 7.32 – 7.19 (m, 3H), 3.84 (s, 1H); **<sup>13</sup>C NMR** (100 MHz, CDCl<sub>3</sub>) δ 196.5, 187.4, 165.7, 136.4, 134.1, 132.2, 129.9, 129.5, 128.8, 128.6, 128.4, 128.3, 127.3, 126.4, 122.0, 72.7, 59.2; **IR (KBr)** ν 3384, 3065, 2930, 2843, 1691, 1677, 1123, 919, 733, 628 cm<sup>-1</sup>; **HRMS (ESI)** found *m/z* 404.0283 [M + H]<sup>+</sup>, calcd for C<sub>22</sub>H<sub>15</sub>BrNO<sub>2</sub> 404.0286.

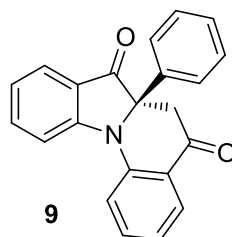

**(R)-6a-phenyl-6,6a-dihydroindolo[1,2-a]quinoline-5,7-dione (9):** yellow solid; 23.4 mg; 48% yield; 88% ee; [determined by **HPLC** analysis Daicel Chirapak AD-H, *n*-hexane/*i*-PrOH = 70/30, 254 nm UV detector, 1.0 mL/min,  $t_R$  = 9.0 min (major) and  $t_R$  = 11.9 min (minor)]; m.p.: 204–206 °C;  $[\alpha]_D^{20}$  – 37.6 (*c* 1.0, CH<sub>2</sub>Cl<sub>2</sub>); **<sup>1</sup>H NMR** (600 MHz, CDCl<sub>3</sub>) δ 7.91 (d, *J* = 7.6 Hz, 1H), 7.77 (dd,

$J = 18.1, 7.9 \text{ Hz}, 3\text{H}$ ),  $7.72 - 7.61 \text{ (m, 2H)}$ ,  $7.37 \text{ (d, } J = 7.5 \text{ Hz, 2H)}$ ,  $7.24 \text{ (dt, } J = 23.1, 6.9 \text{ Hz, 3H)}$ ,  $7.08 \text{ (dd, } J = 11.4, 7.0 \text{ Hz, 2H)}$ ,  $3.68 \text{ (d, } J = 16.7 \text{ Hz, 1H)}$ ,  $3.01 \text{ (d, } J = 16.7 \text{ Hz, 1H)}$ ;  $^{13}\text{C NMR}$  (150 MHz,  $\text{CDCl}_3$ )  $\delta$  198.1, 191.2, 154.7, 142.3, 138.1, 135.7, 134.5, 129.2, 128.6, 126.7, 126.5, 123.8, 123.1, 121.5, 121.1, 119.9, 110.3, 73.1, 44.2; **IR (KBr)**  $\nu$  3116, 3061, 2836, 1710, 1675, 1642, 1495, 1461, 1319, 1302, 923,  $750 \text{ cm}^{-1}$ ; **HRMS** (ESI) found  $m/z$  326.1176  $[\text{M} + \text{H}]^+$ , calcd for  $\text{C}_{22}\text{H}_{16}\text{NO}_2$  326.1181.

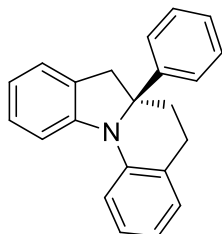

**10**

**(S)-6a-phenyl-5,6,6a,7-tetrahydroindolo[1,2-a]quinoline (10)**: pale white solid; 16.9 mg; 82% yield; 87% ee; [determined by **HPLC** analysis Daicel Chirapak OD-H, *n*-hexane/*i*-PrOH = 98/2, 254 nm UV detector, 1.0 mL/min,  $t_R = 9.5$  min (minor) and  $t_R = 11.3$  min (major)]; m.p.: 64–66 °C;  $[\alpha]_D^{20} - 5.2$  ( $c$  1.0,  $\text{CH}_2\text{Cl}_2$ );  $^1\text{H NMR}$  (600 MHz,  $\text{CDCl}_3$ )  $\delta$  7.55 (dd,  $J = 8.1, 0.7 \text{ Hz}, 1\text{H}$ ), 7.39 (dt,  $J = 3.2, 1.8 \text{ Hz}, 2\text{H}$ ), 7.28 – 7.20 (m, 4H), 7.19 – 7.13 (m, 1H), 7.09 (t,  $J = 7.8 \text{ Hz}, 2\text{H}$ ), 6.98 (d,  $J = 7.0 \text{ Hz}, 1\text{H}$ ), 6.90 (td,  $J = 7.4, 1.1 \text{ Hz}, 1\text{H}$ ), 6.82 – 6.72 (m, 1H), 3.28 (dd,  $J = 15.7, 7.7 \text{ Hz}, 2\text{H}$ ), 2.66 (dd,  $J = 16.8, 5.1 \text{ Hz}, 1\text{H}$ ), 2.53 – 2.44 (m, 1H), 2.44 – 2.34 (m, 1H), 2.22 (td,  $J = 13.1, 5.6 \text{ Hz}, 1\text{H}$ );  $^{13}\text{C NMR}$  (150 MHz,  $\text{CDCl}_3$ )  $\delta$  148.7, 145.3, 141.1, 129.8, 128.6, 128.3, 127.6, 127.4, 126.5, 126.3, 126.0, 125.2, 122.1, 121.8, 119.6, 108.6, 69.5, 45.9, 30.8, 25.0; **IR (KBr)**  $\nu$  2956, 2921, 1645, 1626, 1485, 1349, 1162,  $575 \text{ cm}^{-1}$ ; **HRMS** (ESI) found  $m/z$  298.1565  $[\text{M} + \text{H}]^+$ , calcd for  $\text{C}_{20}\text{H}_{20}\text{N}$  298.1596.

### Control experiment

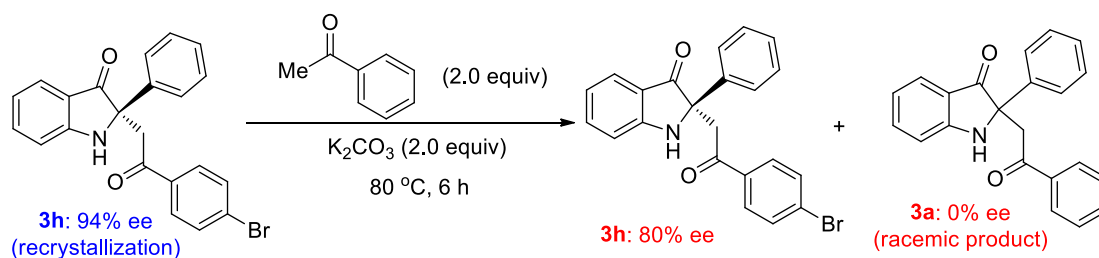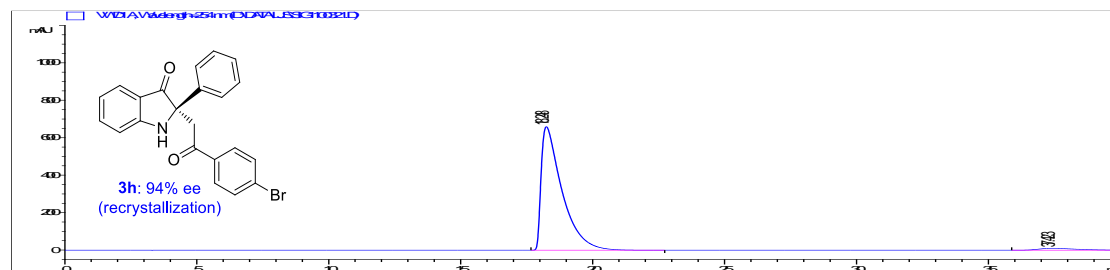

| Peak # | RetTime (min) | Area mAU *s | Height (mAU) | Width (min) | Symmetry Factor | Area (%) |
|--------|---------------|-------------|--------------|-------------|-----------------|----------|
| 1      | 18.248        | 36122.7     | 659.6        | 0.802       | 0.303           | 97.249   |
| 2      | 37.423        | 1021.7      | 10.2         | 1.3954      | 0.513           | 2.751    |



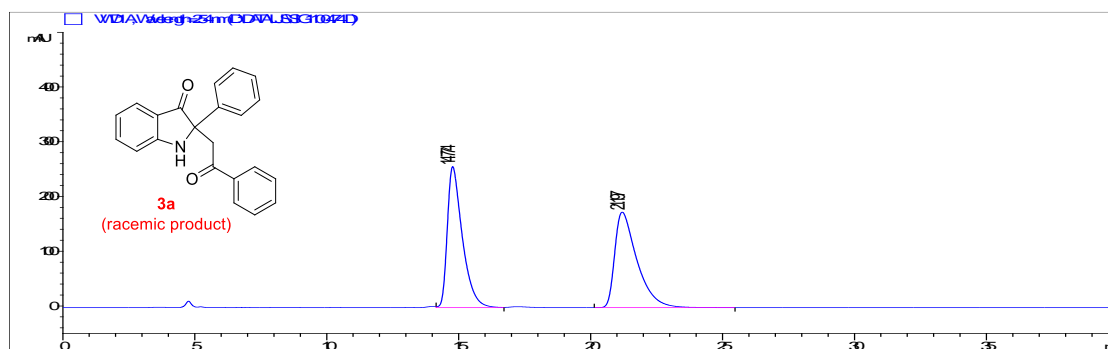

| Peak # | RetTime (min) | Area mAU *s | Height (mAU) | Width (min) | Symmetry Factor | Area (%) |
|--------|---------------|-------------|--------------|-------------|-----------------|----------|
| 1      | 14.774        | 10210.5     | 257.5        | 0.5907      | 0.52            | 49.990   |
| 2      | 21.197        | 10214.5     | 174.5        | 0.8692      | 0.466           | 50.010   |

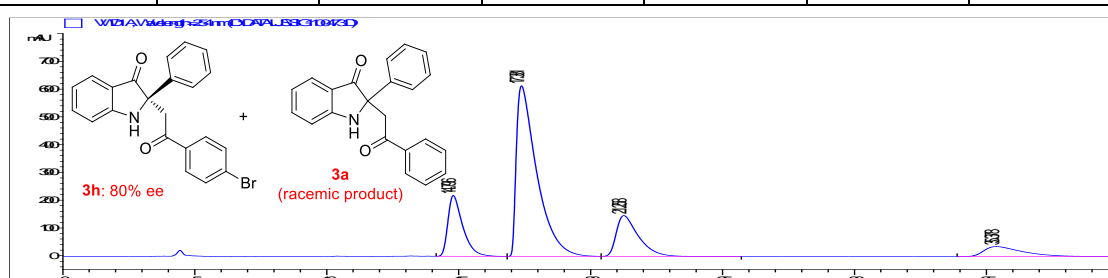

| Peak # | RetTime (min) | Area mAU *s | Height (mAU) | Width (min) | Symmetry Factor | Area (%) |
|--------|---------------|-------------|--------------|-------------|-----------------|----------|
| 1      | 14.796        | 8580        | 218.9        | 0.5826      | 0.529           | 15.904   |
| 2      | 17.381        | 33070.9     | 614.4        | 0.7969      | 0.307           | 61.301   |
| 3      | 21.258        | 8633        | 147.2        | 0.8704      | 0.475           | 16.002   |
| 4      | 35.378        | 3664.2      | 36           | 1.448       | 0.446           | 6.792    |

## Reference

1. J.-S. Li, Y.-J. Liu, G.-W. Zhang, J.-A. Ma, *Org. Lett.*, 2017, **19**, 6364.
2. B. Yin, P.-P. Huang, Y.-B. Lu, L.-X. Liu, *RSC Adv.*, 2017, **7**, 606.
3. L.-Q. Li, M.-Y. Han, M.-X. Xiao, Z.-X. Xie, *Synlett.*, 2011, **12**, 1727.
4. X.-L. Lian, H. Lei, X.-J. Quan, Z.-H. Ren, Y.-Y. Wang, Z.-H. Guan, *Chem. Commun.*, 2013, **49**, 8196.
5. D. Parmar, E. Sugiono, S. Raja, M. Rueping, *Chem. Rev.*, 2014, **114**, 9047.
6. C. V. S. Kumar, C. V. Ramana, *Org. Lett.*, 2015, **17**, 2870.
7. Y. Shao, Y.-M. Zeng, J.-Y. Ji, X.-Q. Sun, H.-T. Yang, C.-B. Miao, *J. Org. Chem.*, 2016, **81**, 12443.
8. X.-X. Zhang, P. Li, C. Lyu, W.-X. Yong, J. Li, X.-Y. Pan, X.-B. Zhu, W.-D. Rao, *Adv. Synth. Catal.*, 2017, **359**, 4147.
9. M. E. Zhidkov, V. A. Kaminskii, *Tetrahedron Lett.*, 2013, **54**, 3530.
10. K. Saito, Y. Moriya, T. Akiyama, *Org. Lett.*, 2015, **17**, 3202.

# NMR spectra of the related compounds

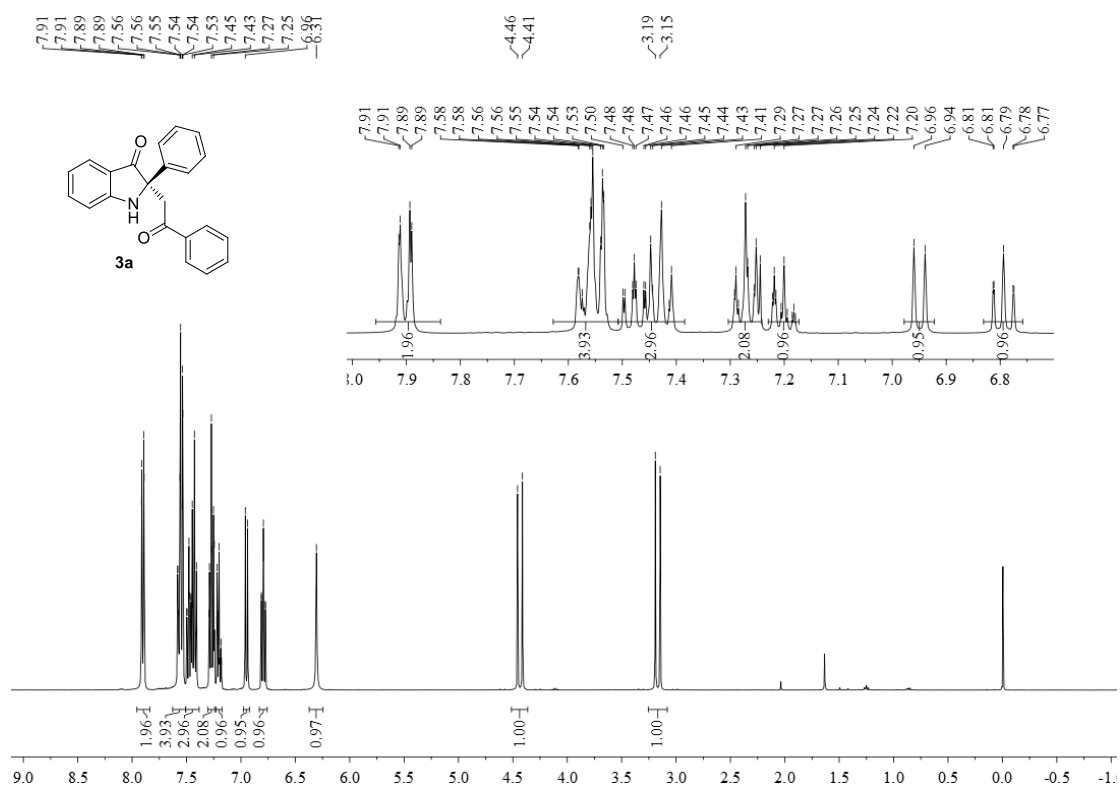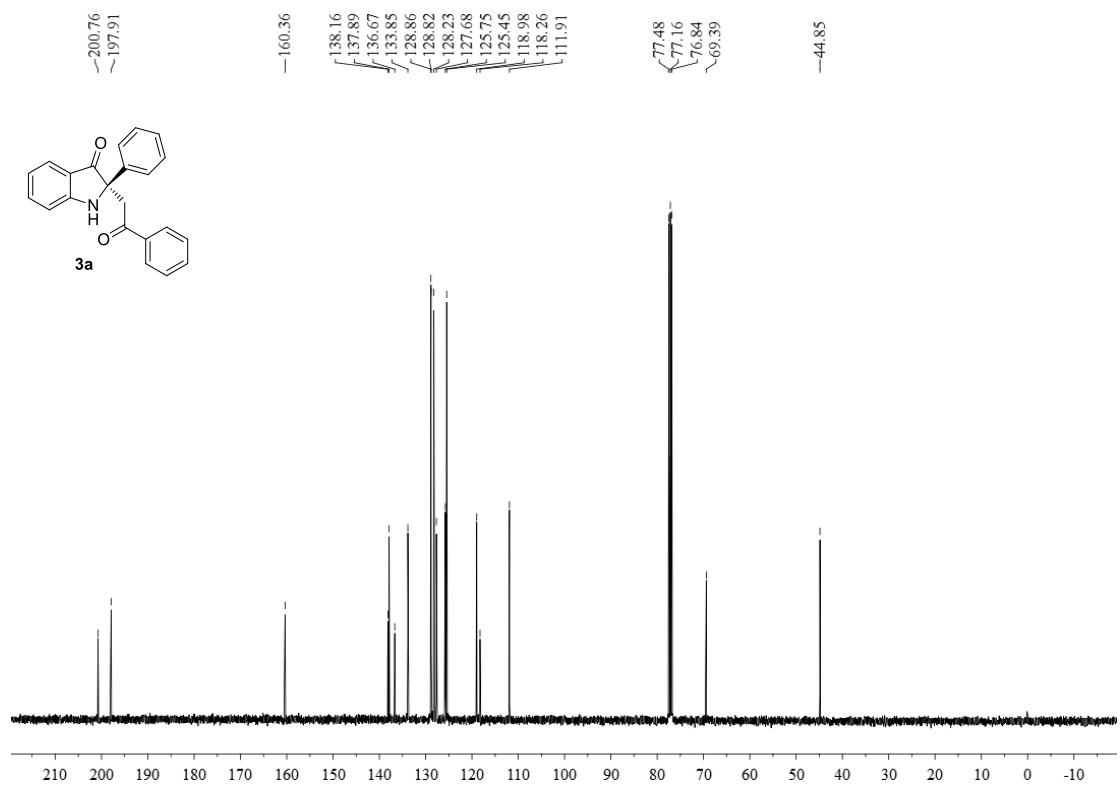

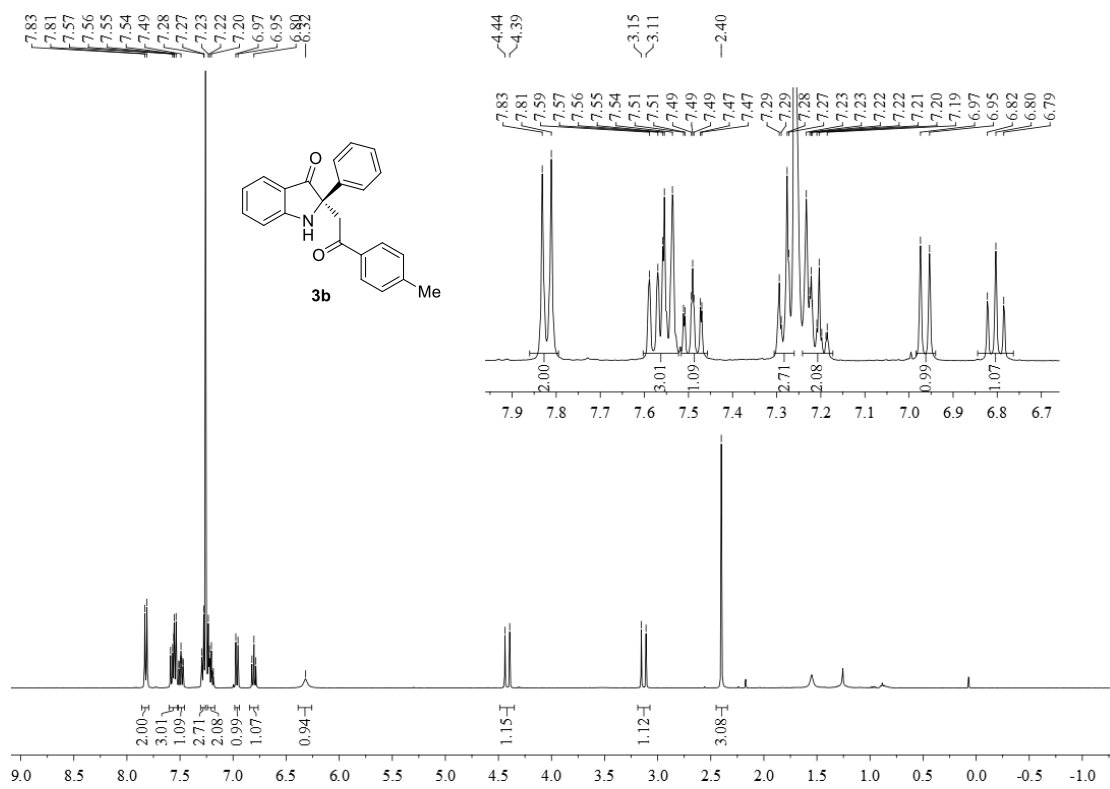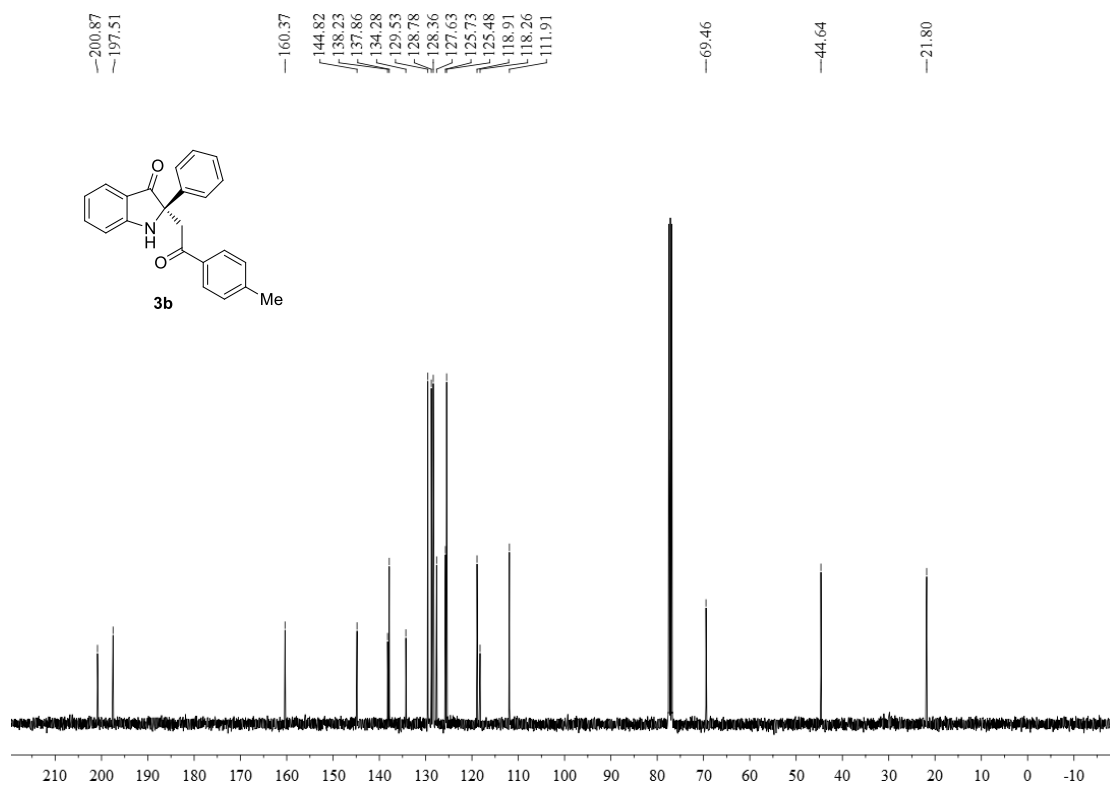

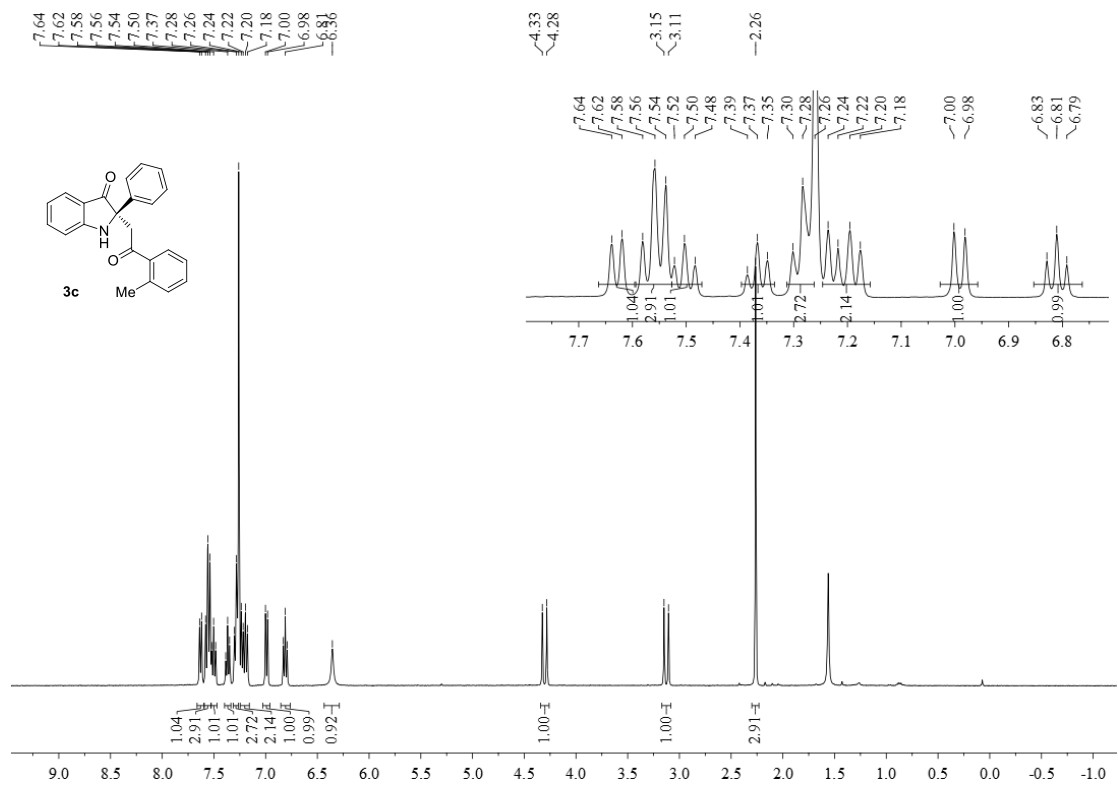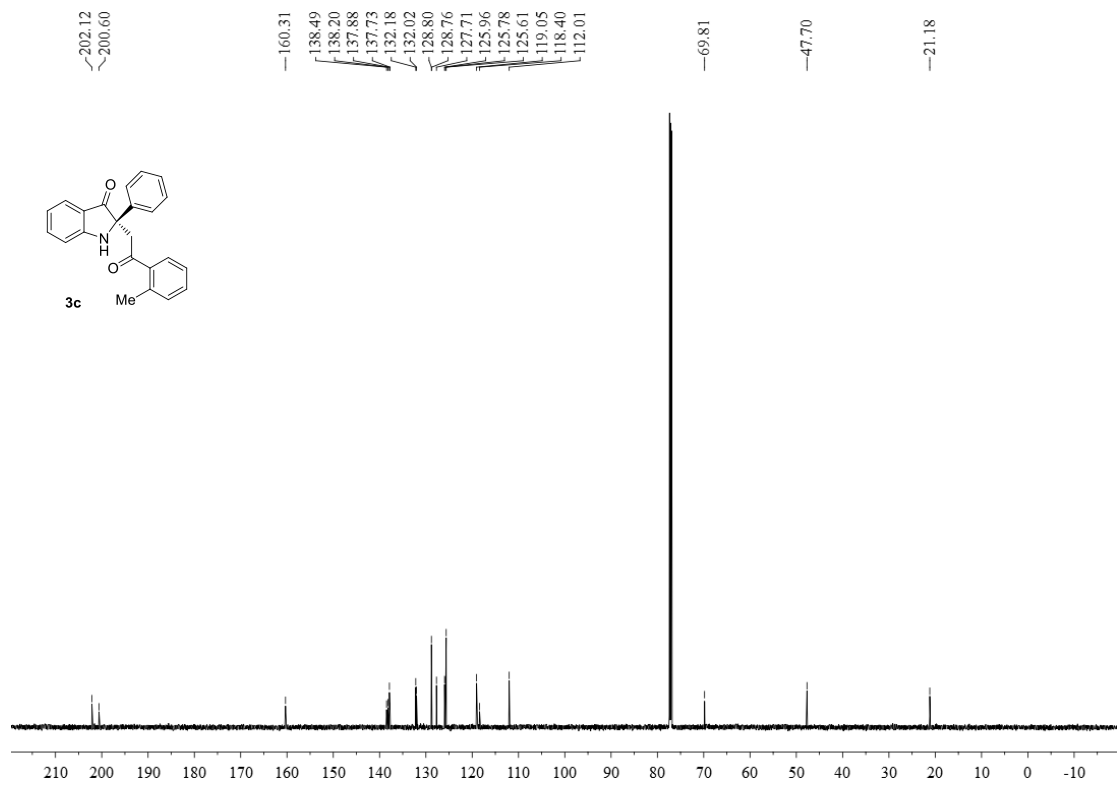

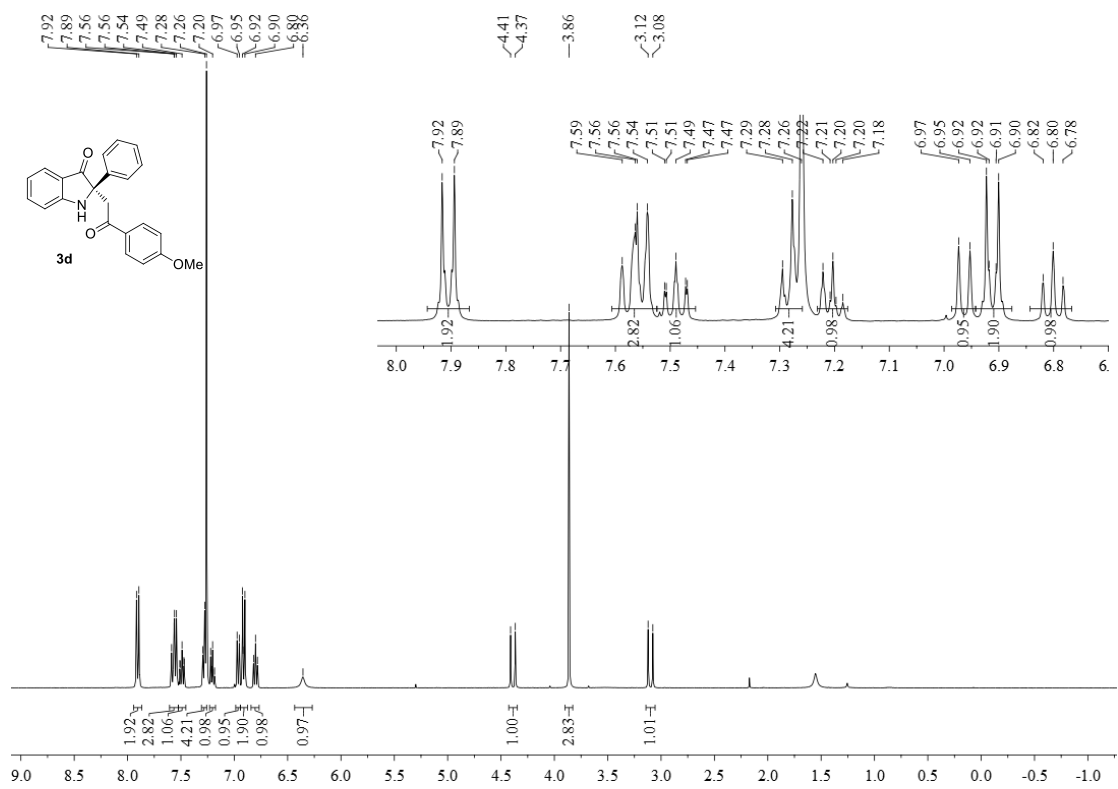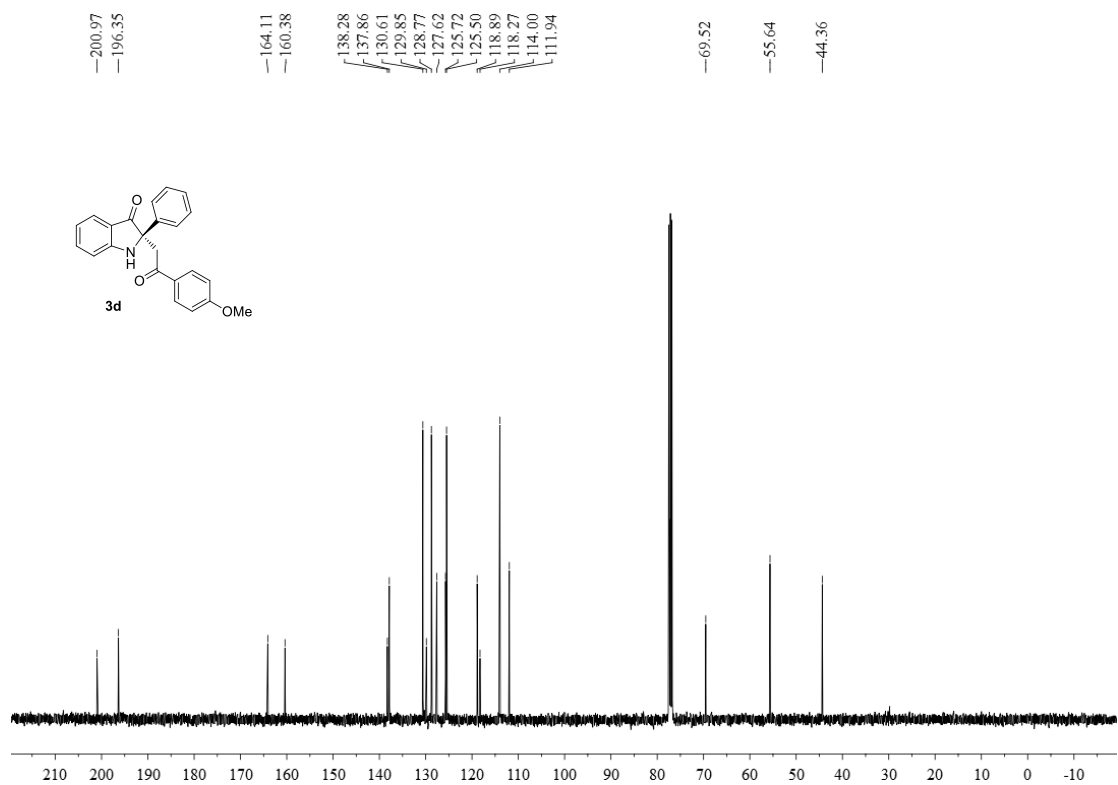

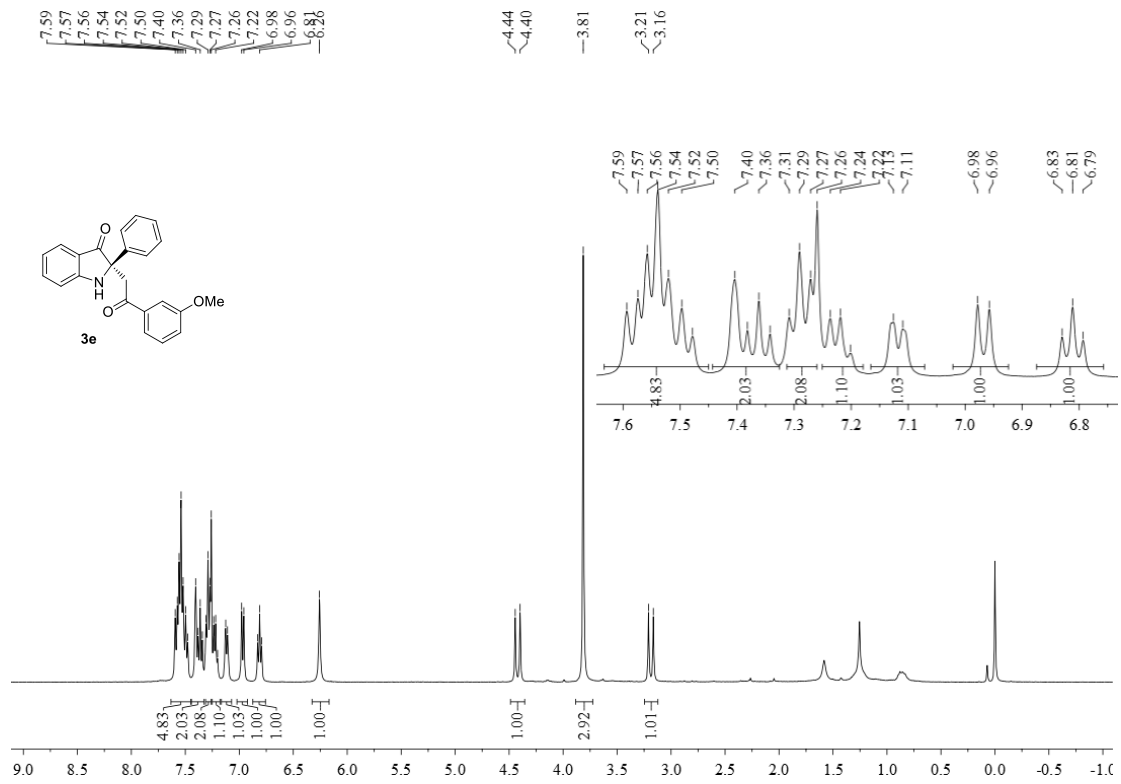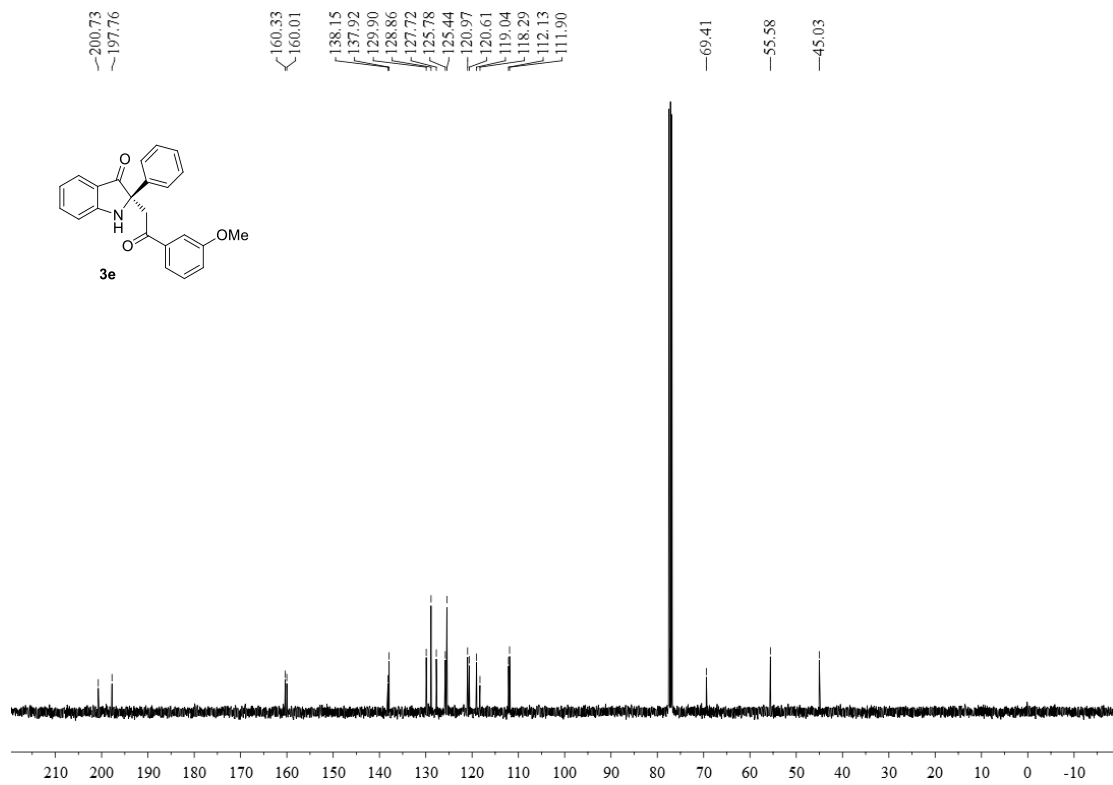



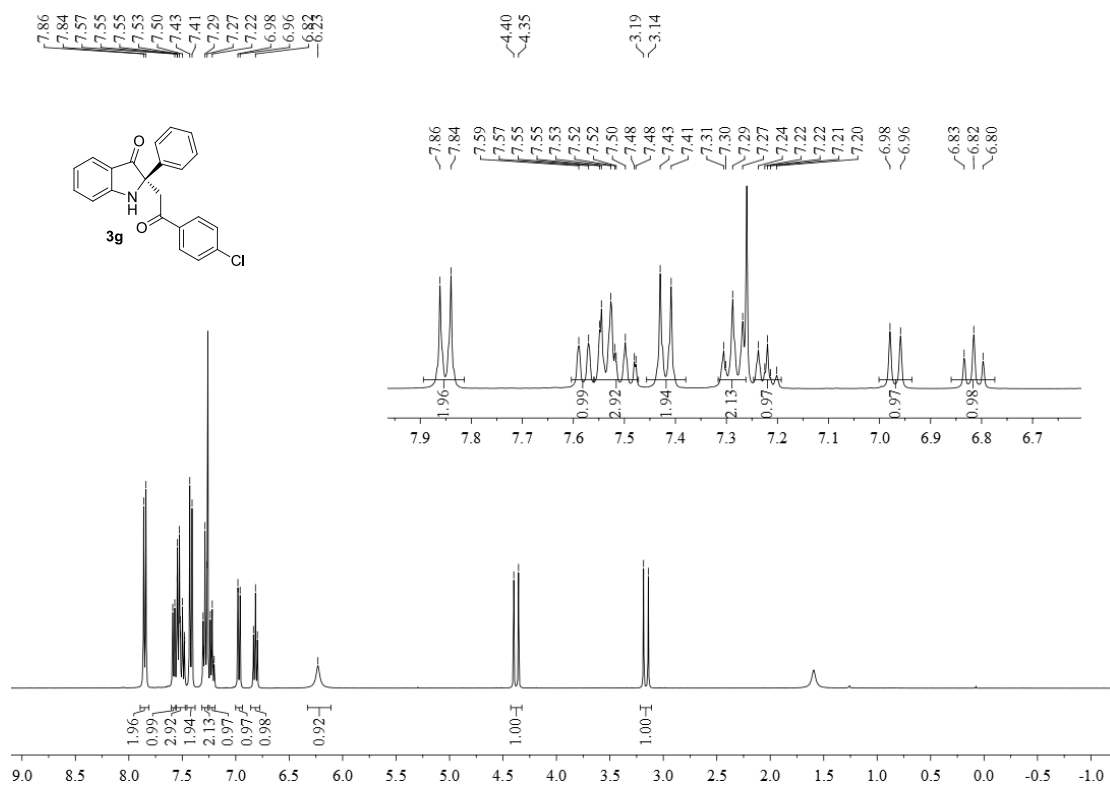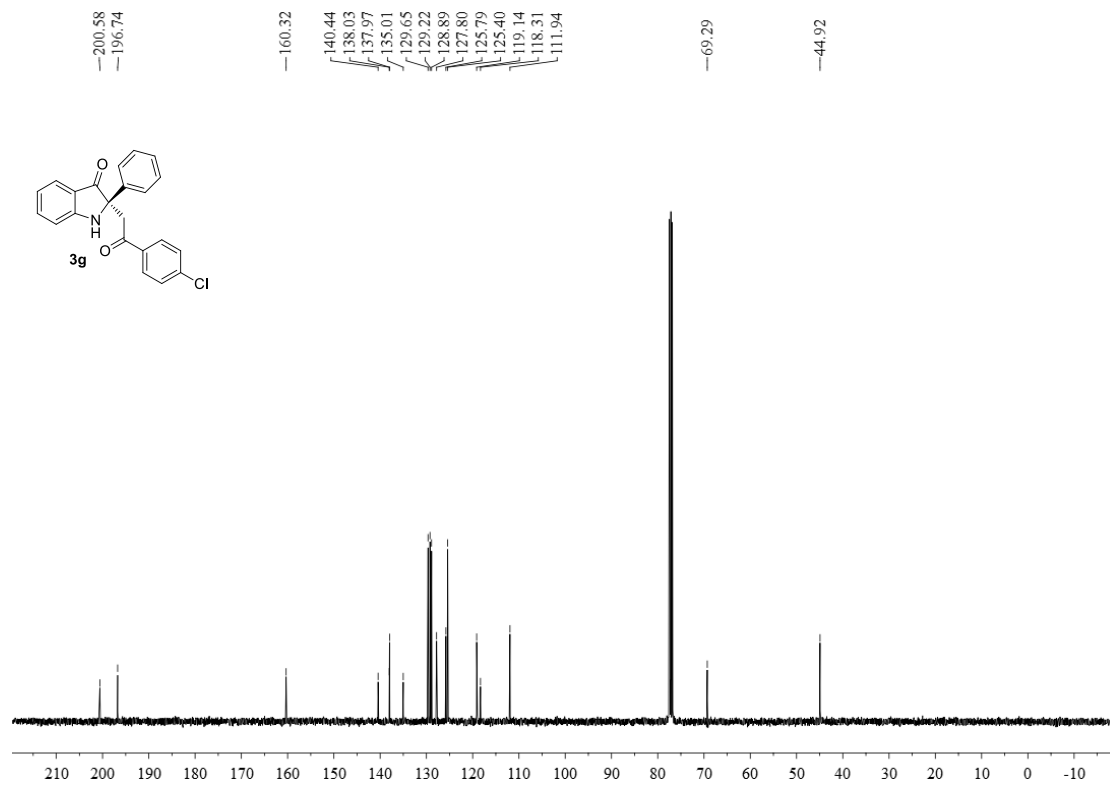



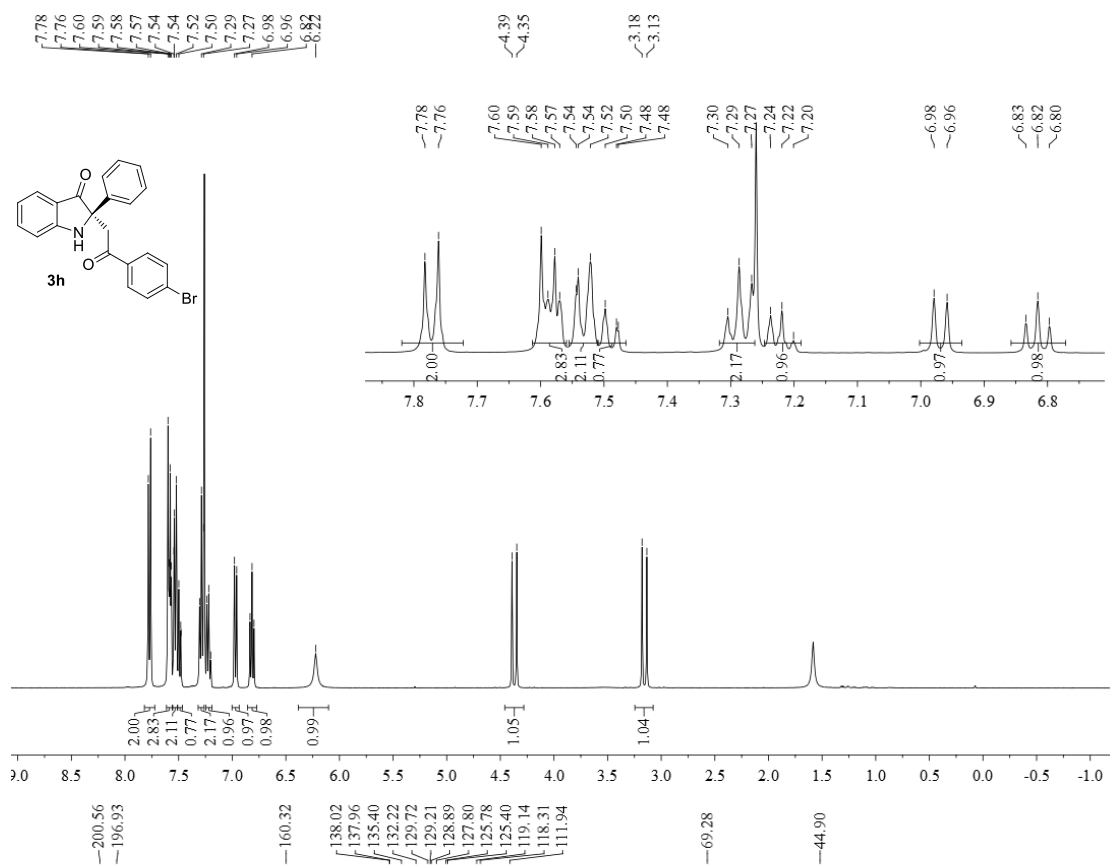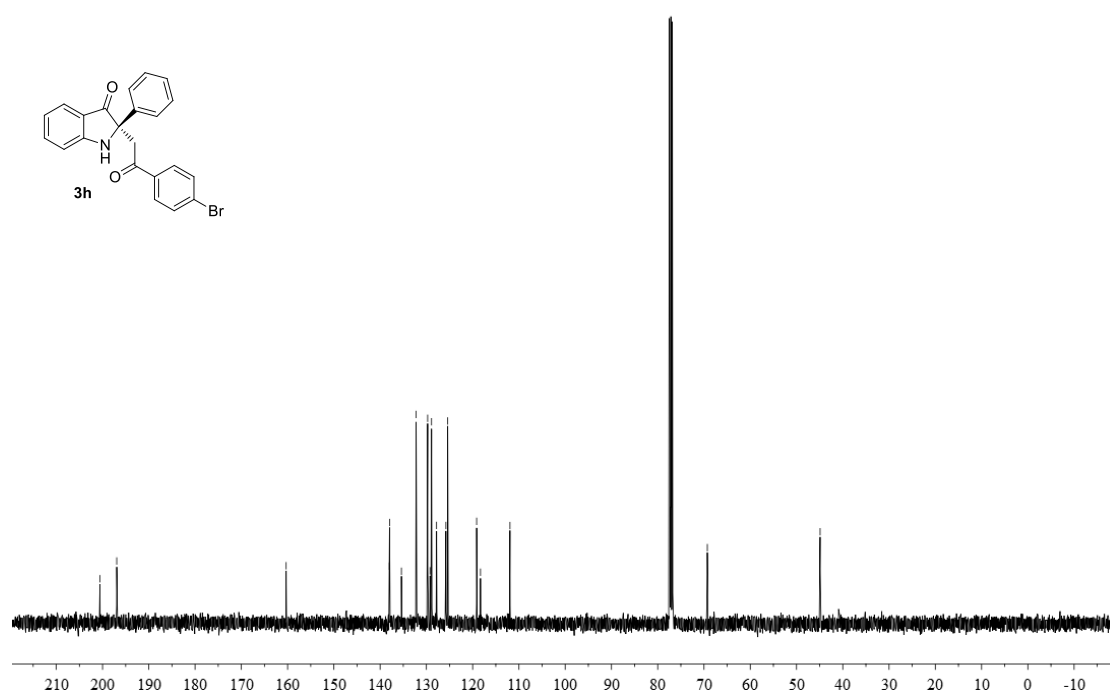

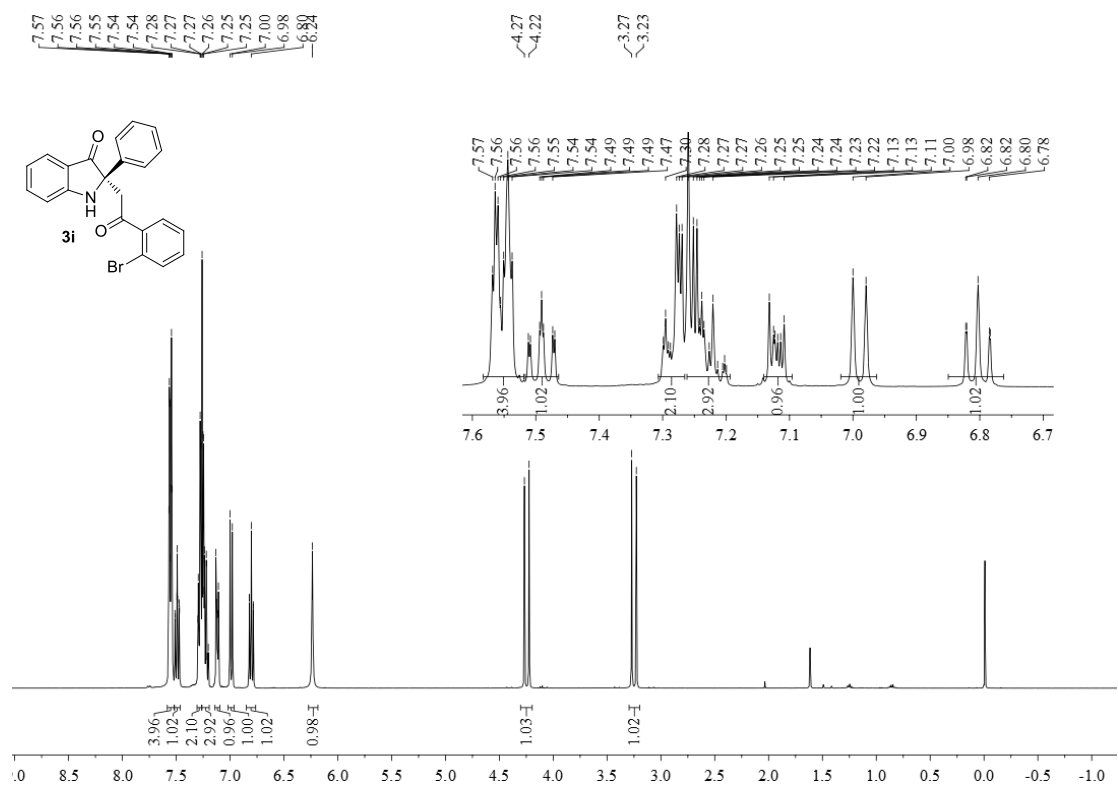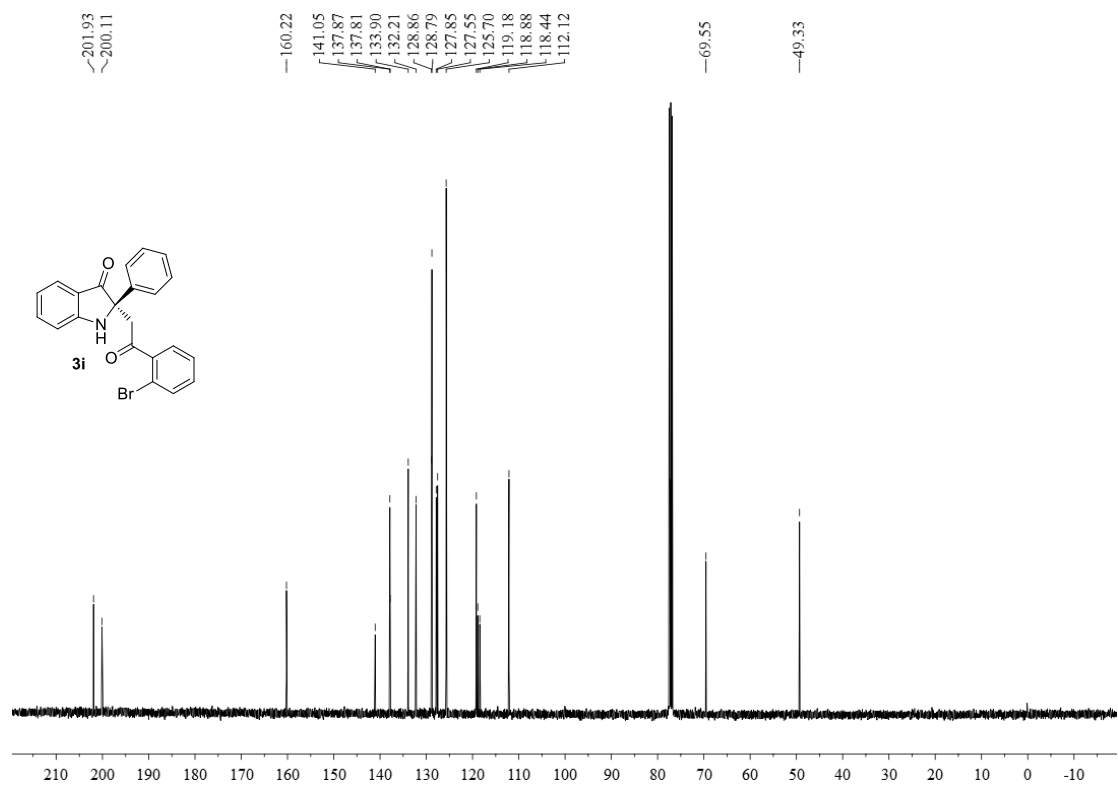

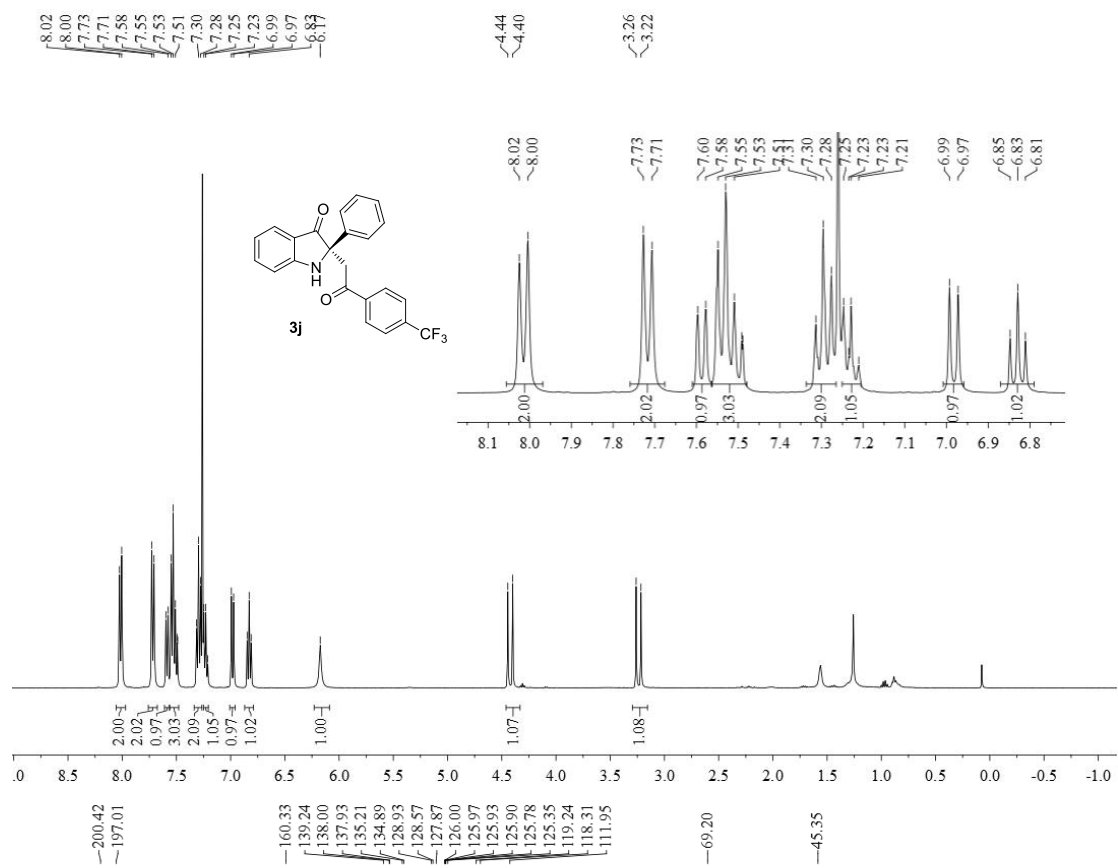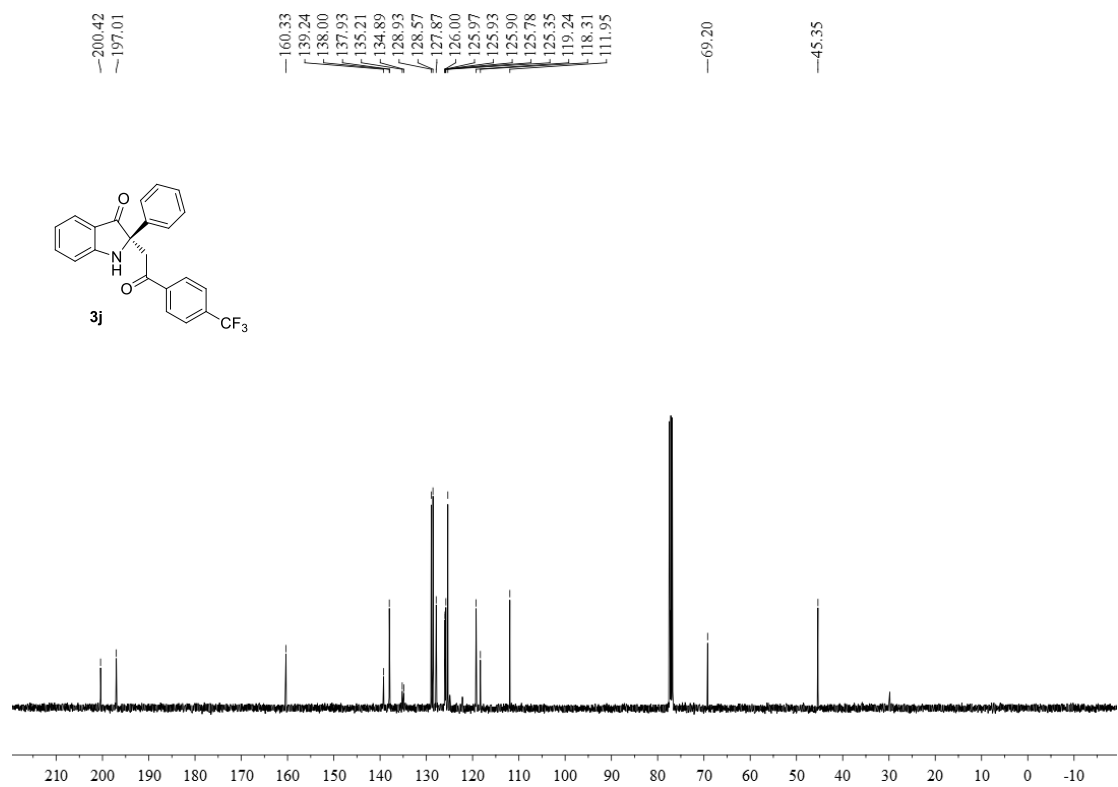

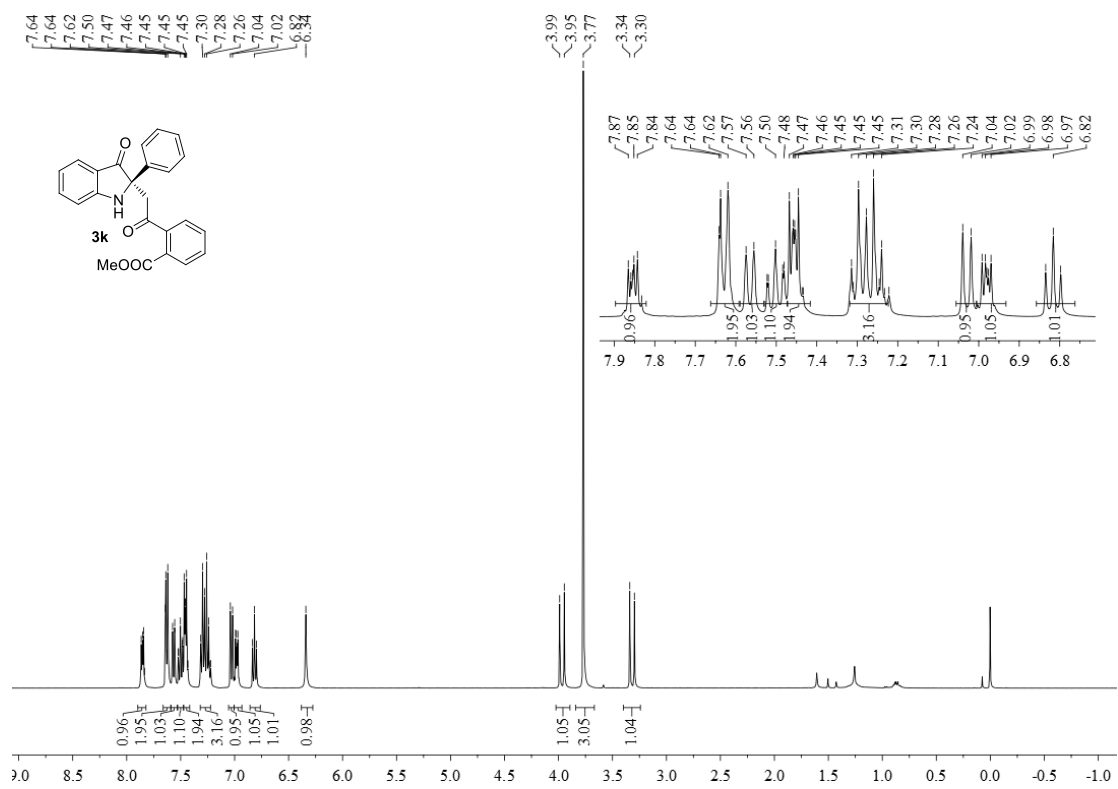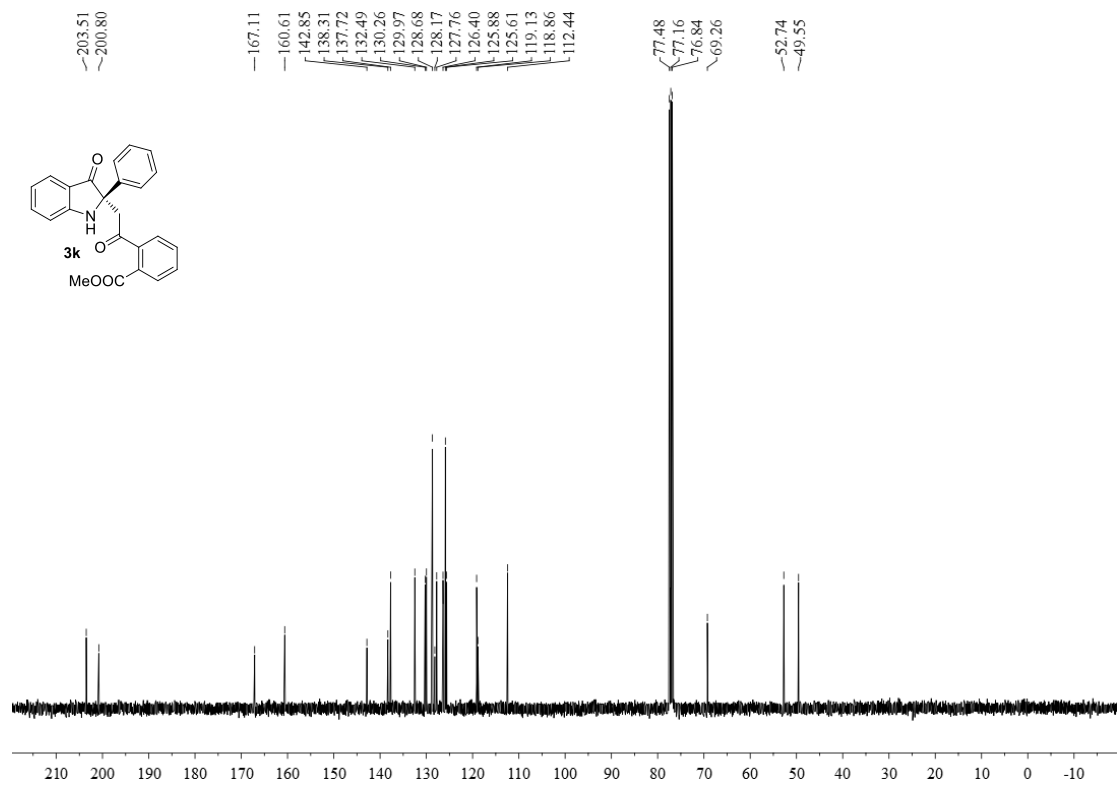

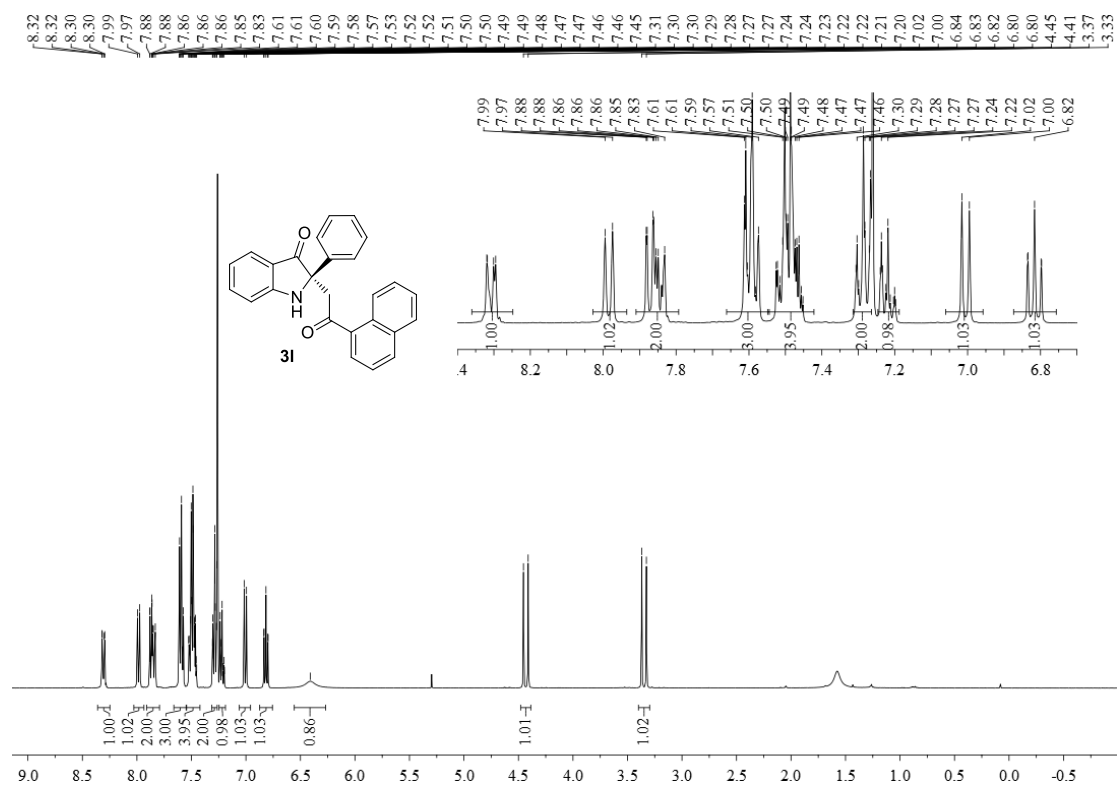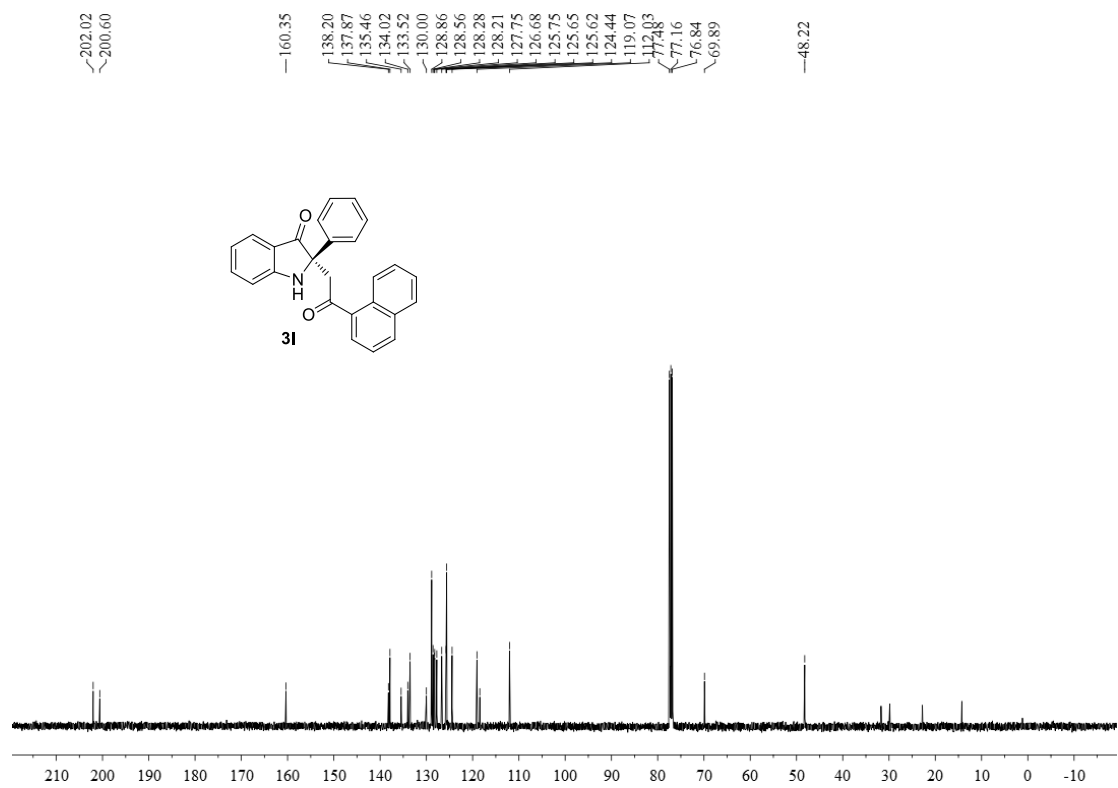

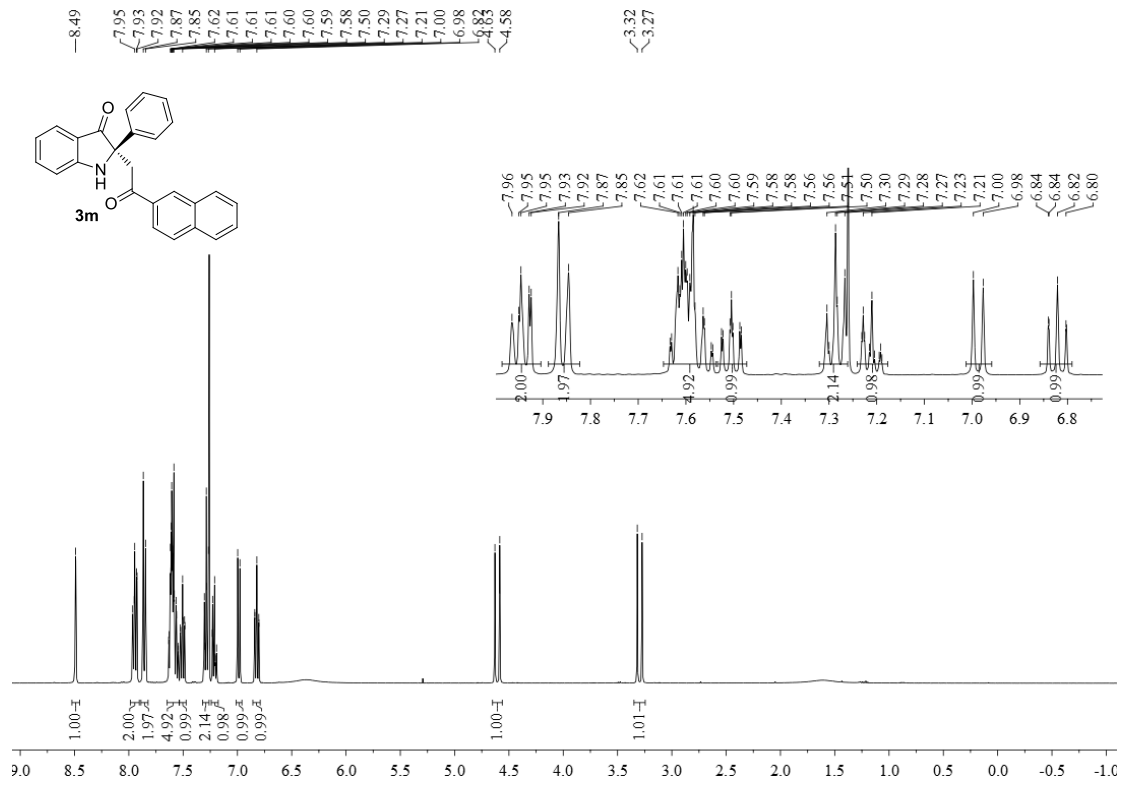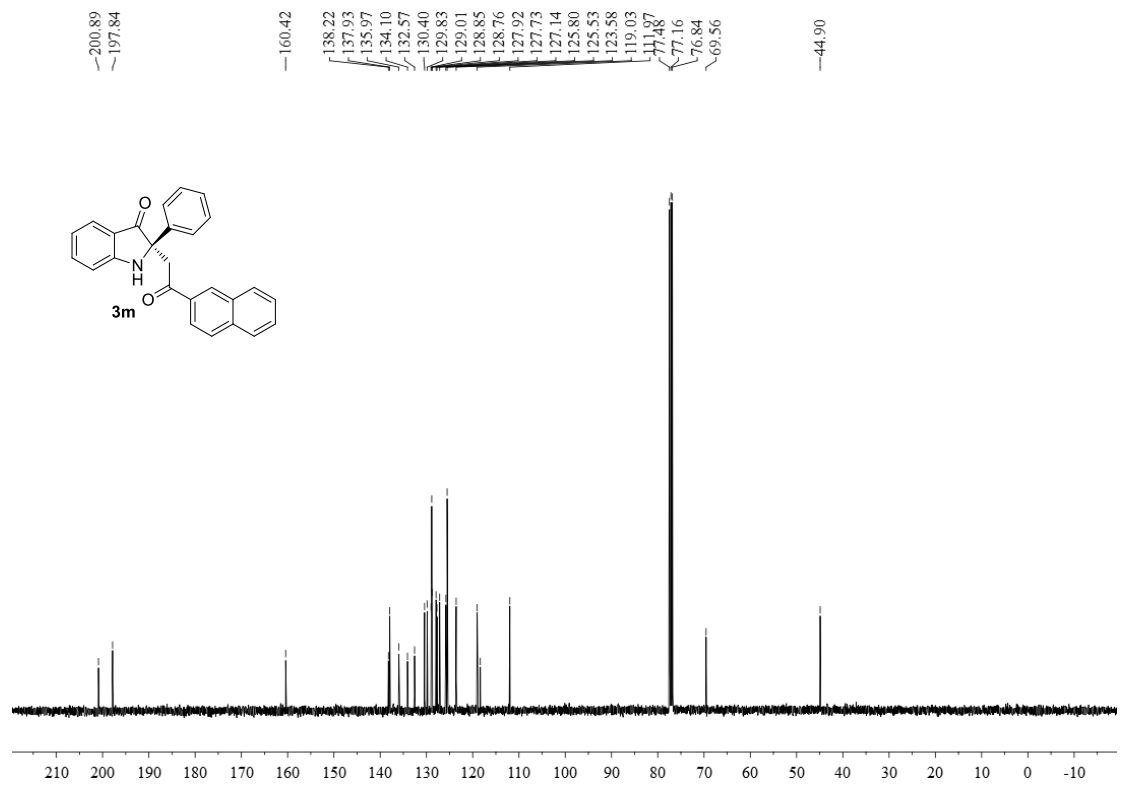

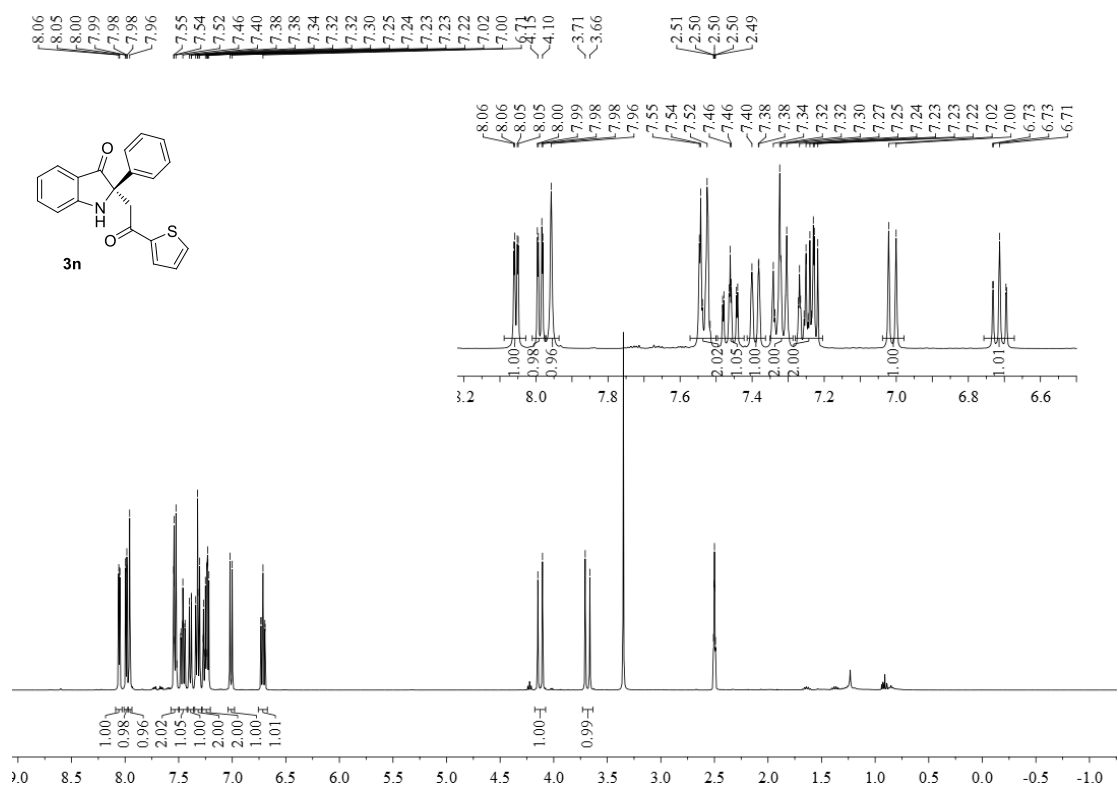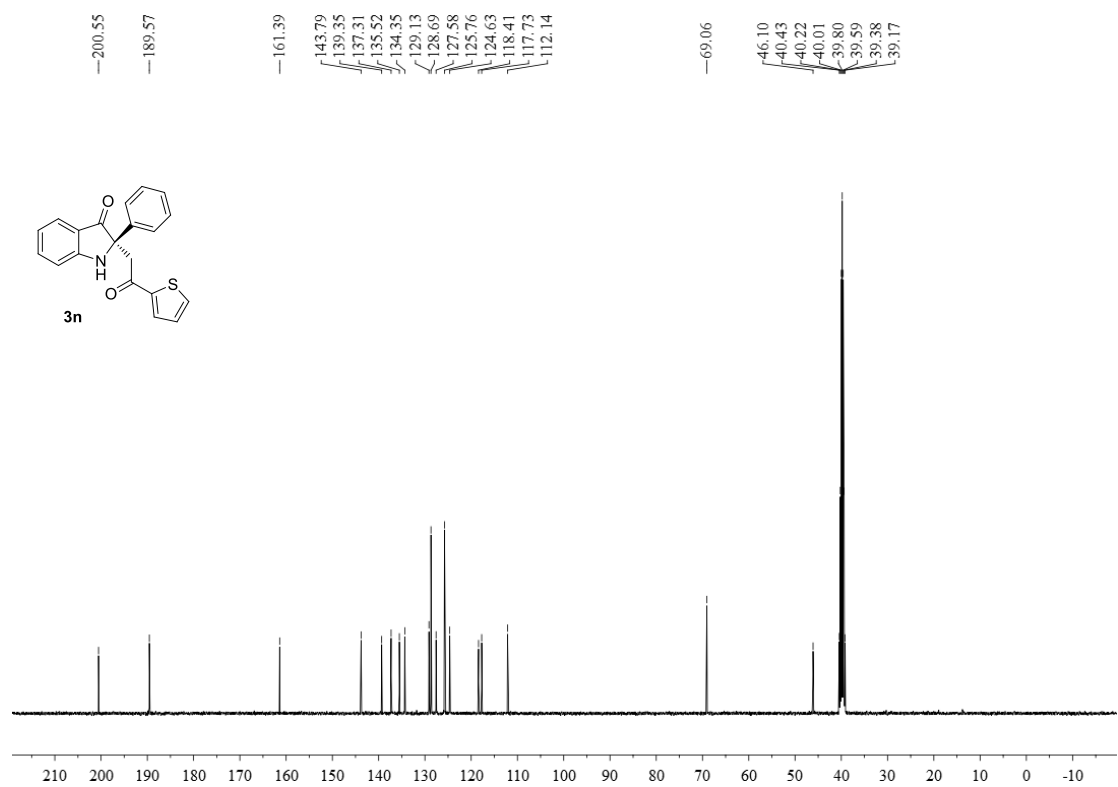

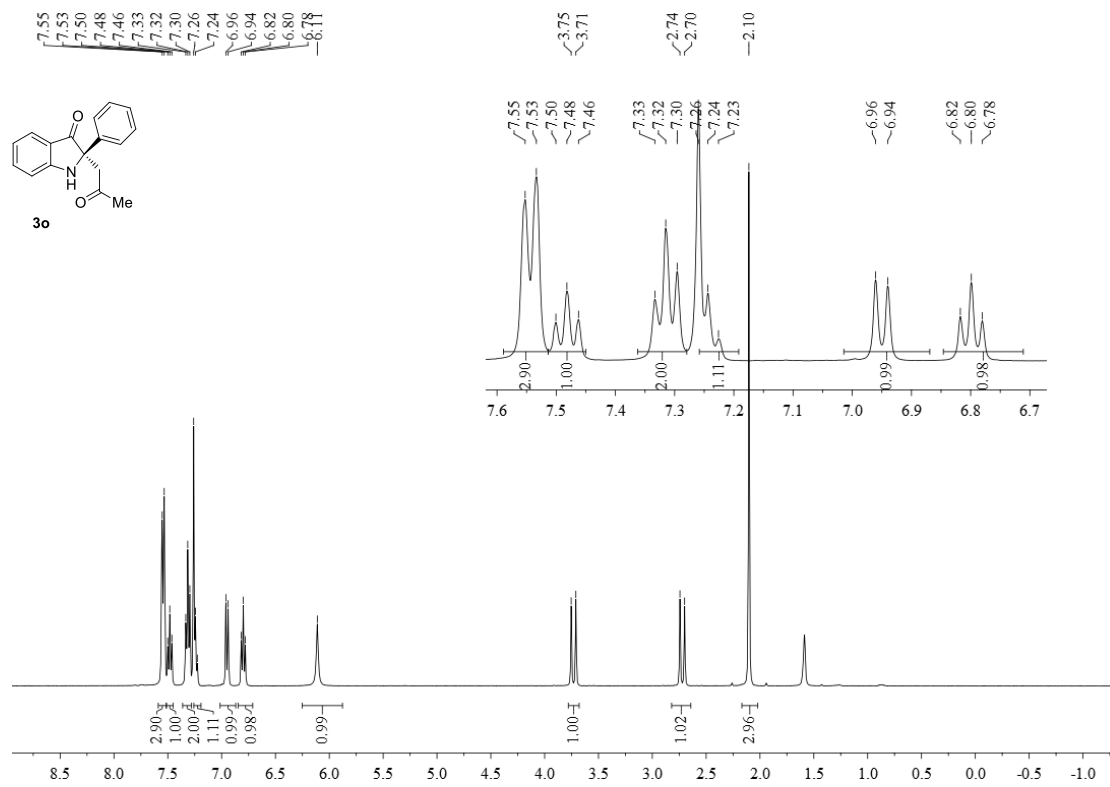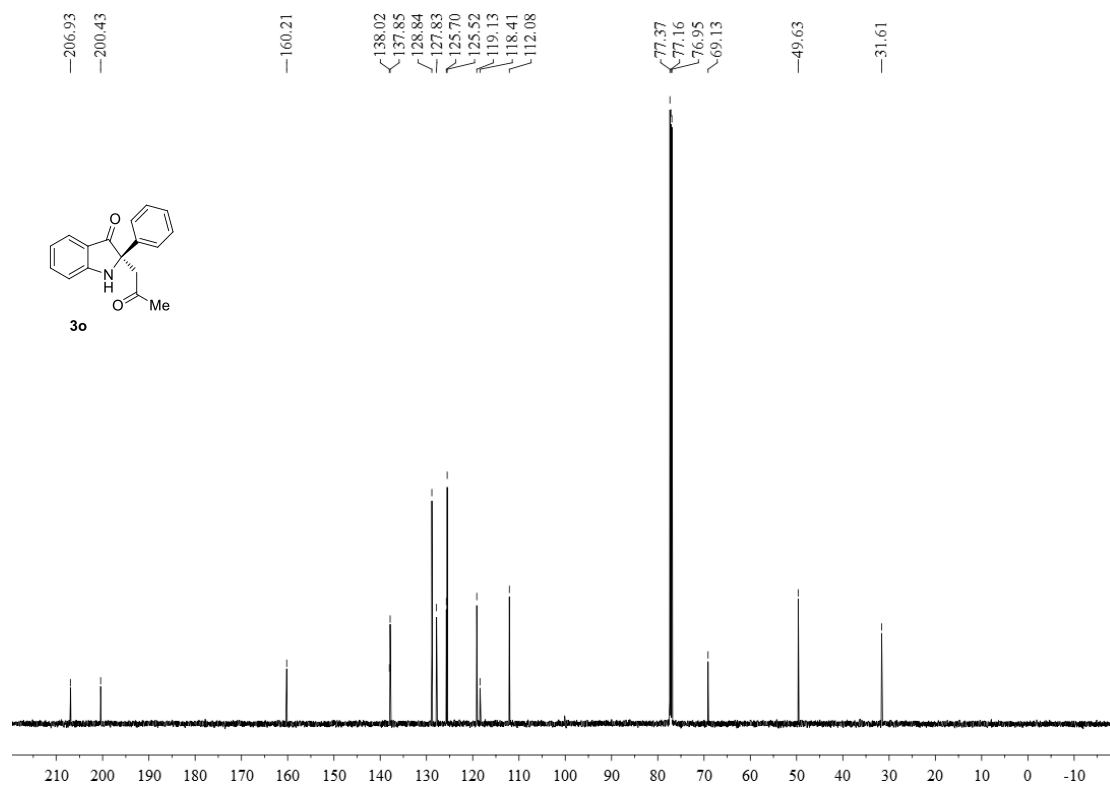





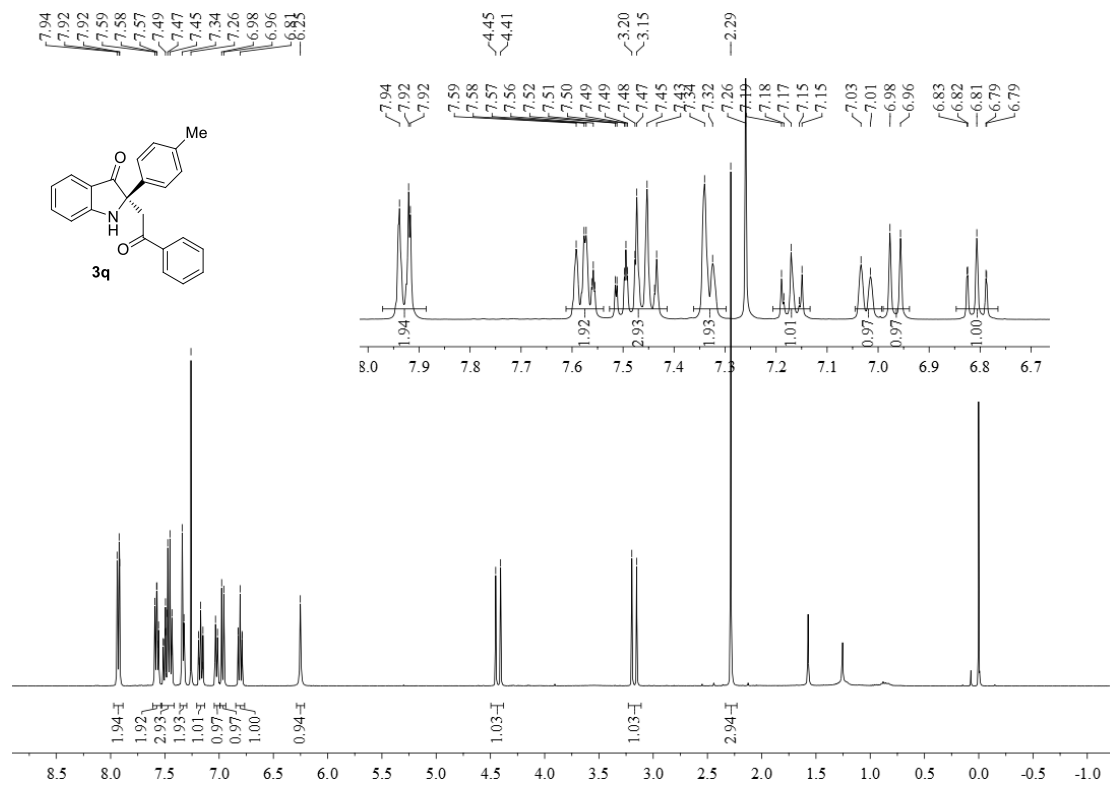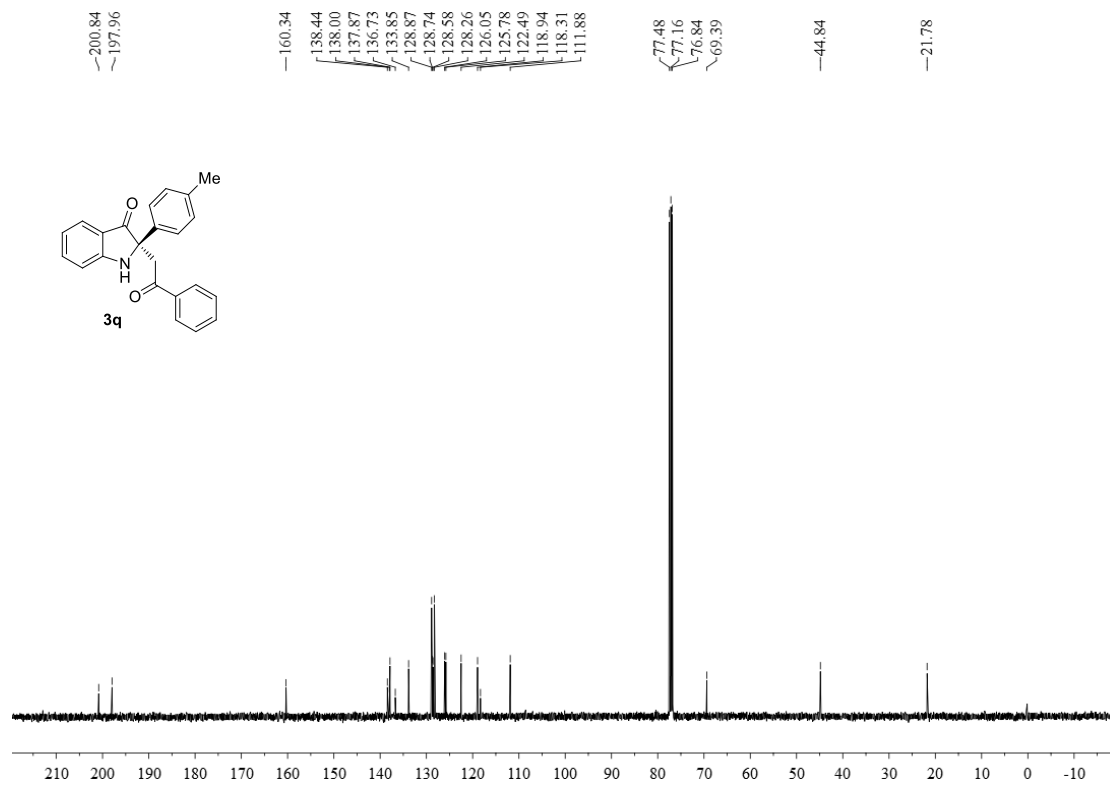

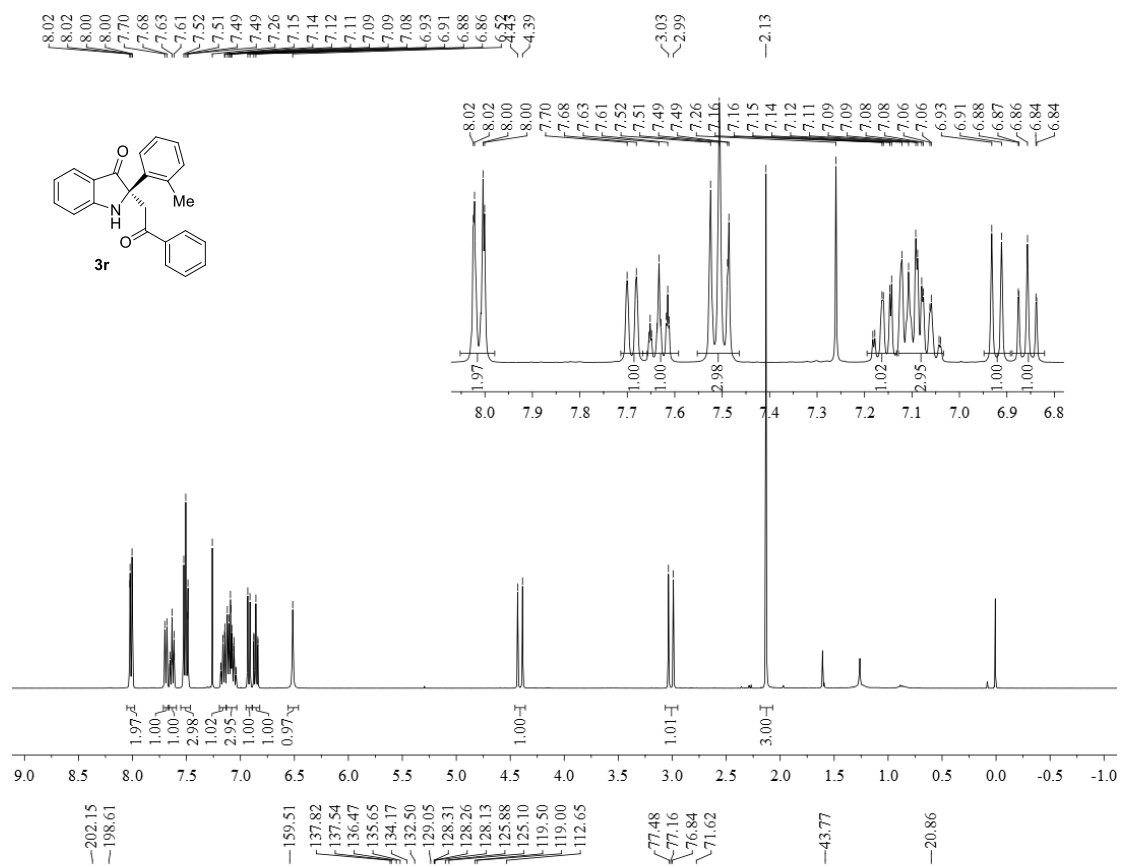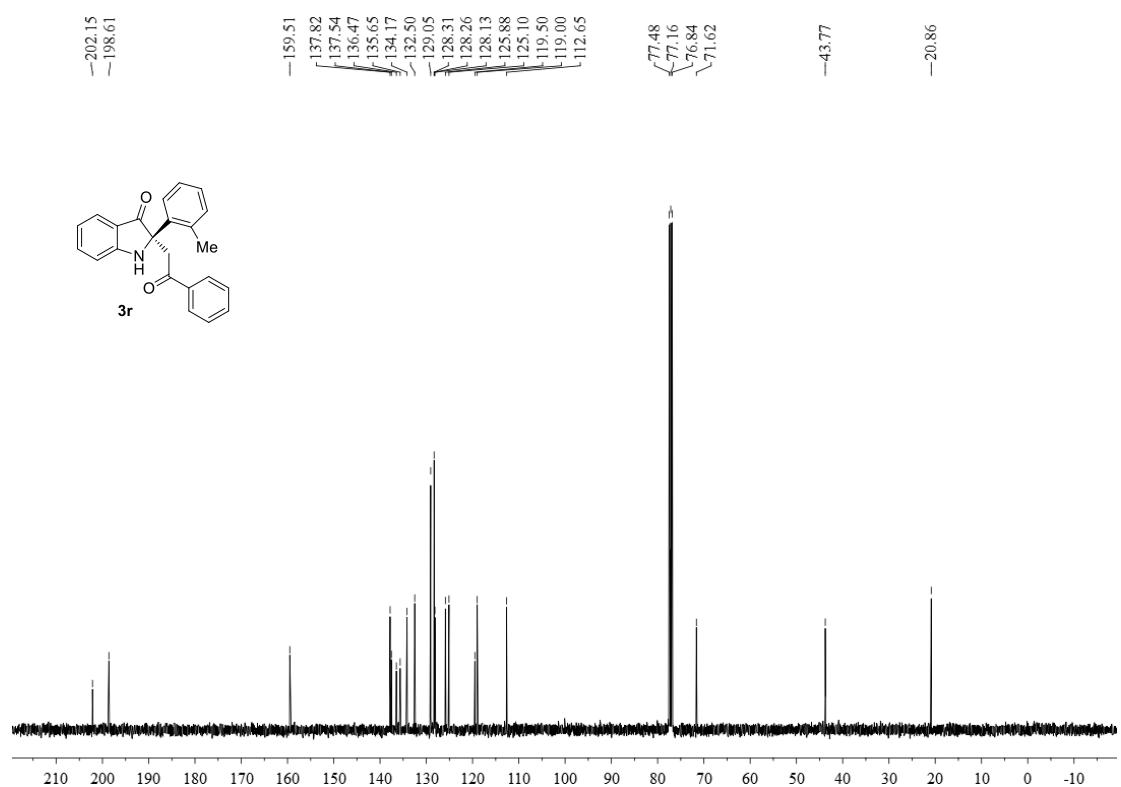

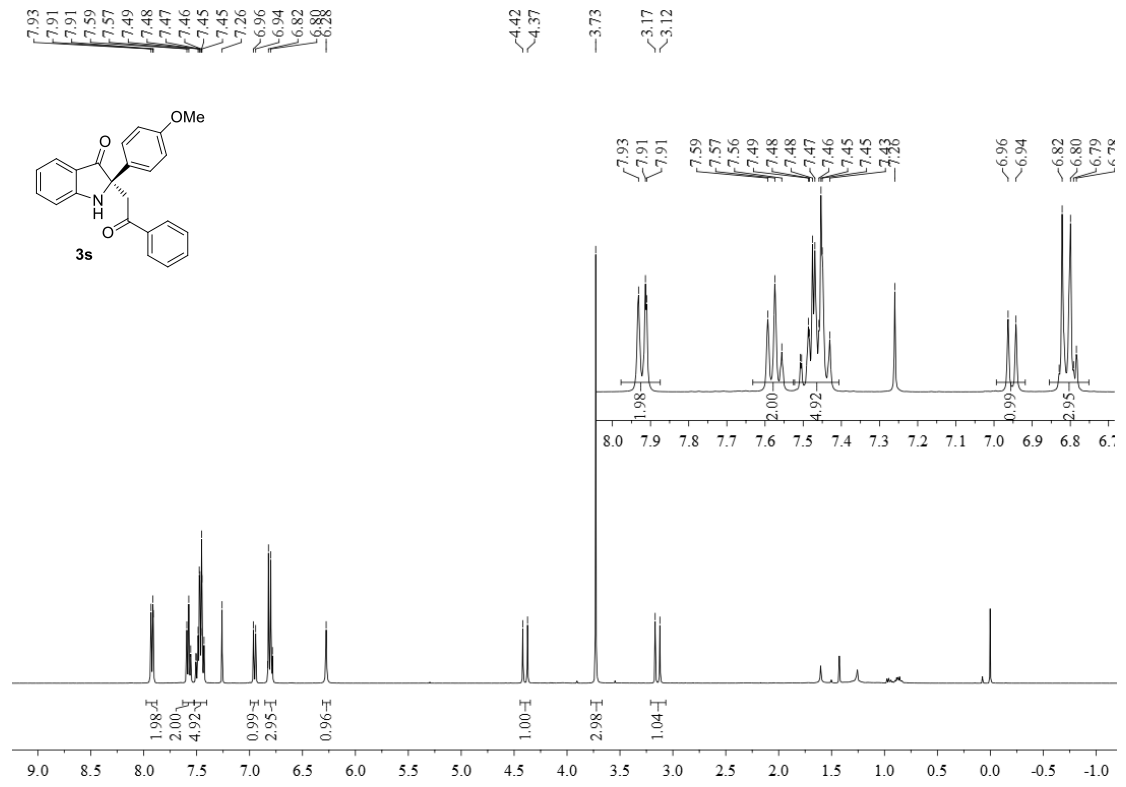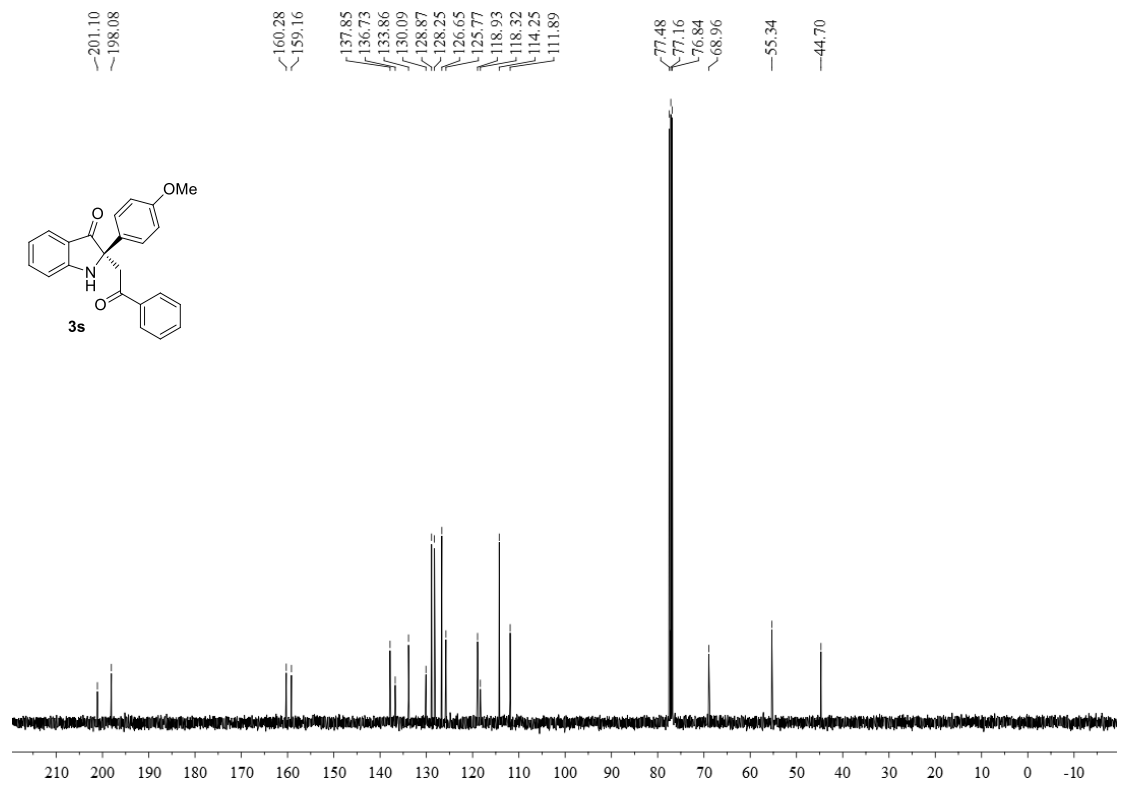

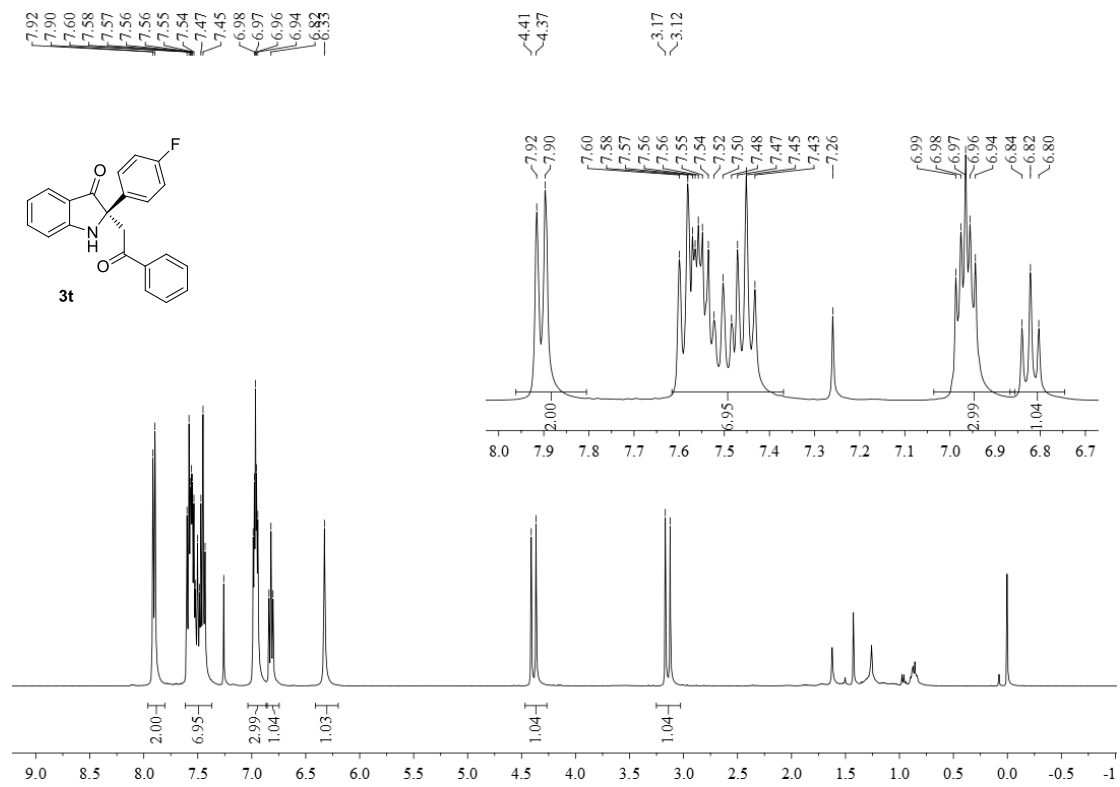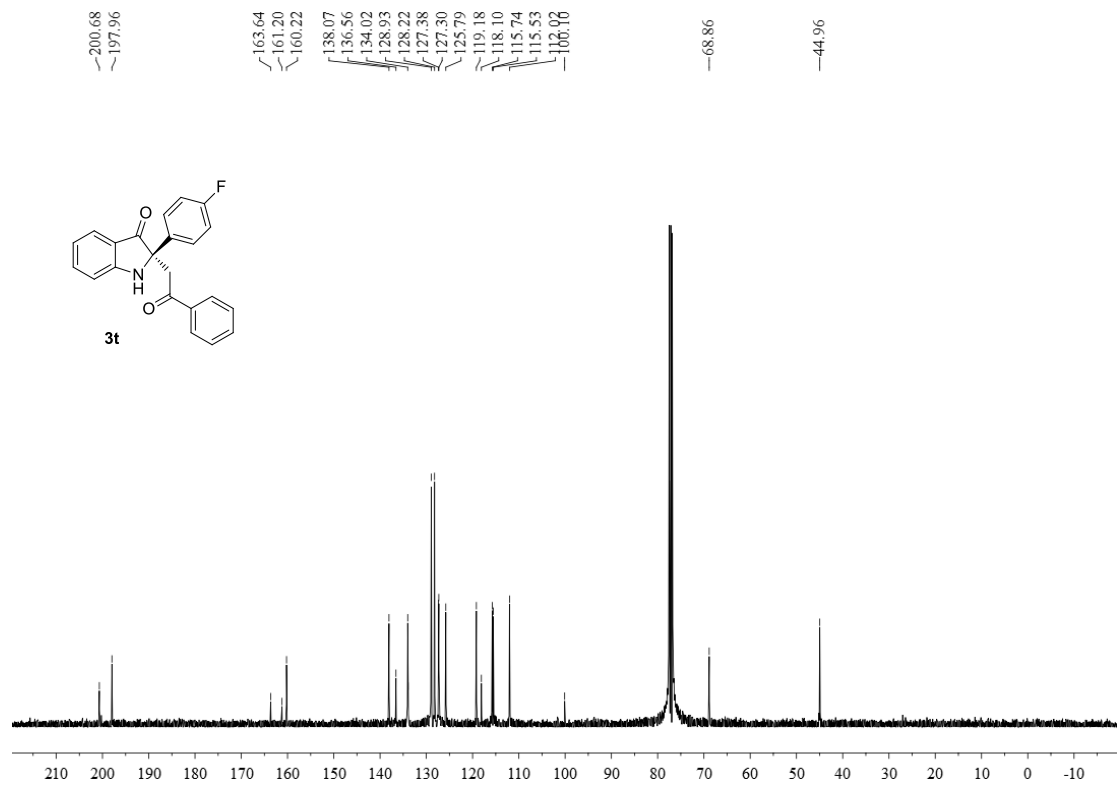

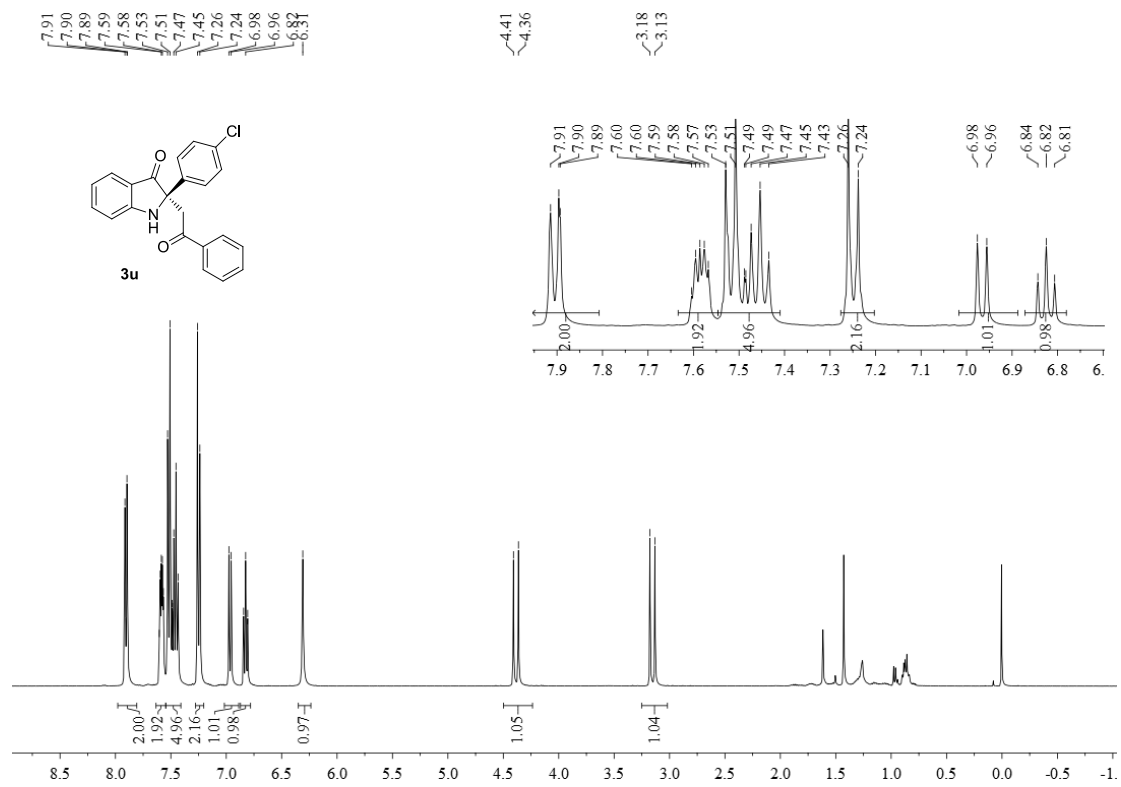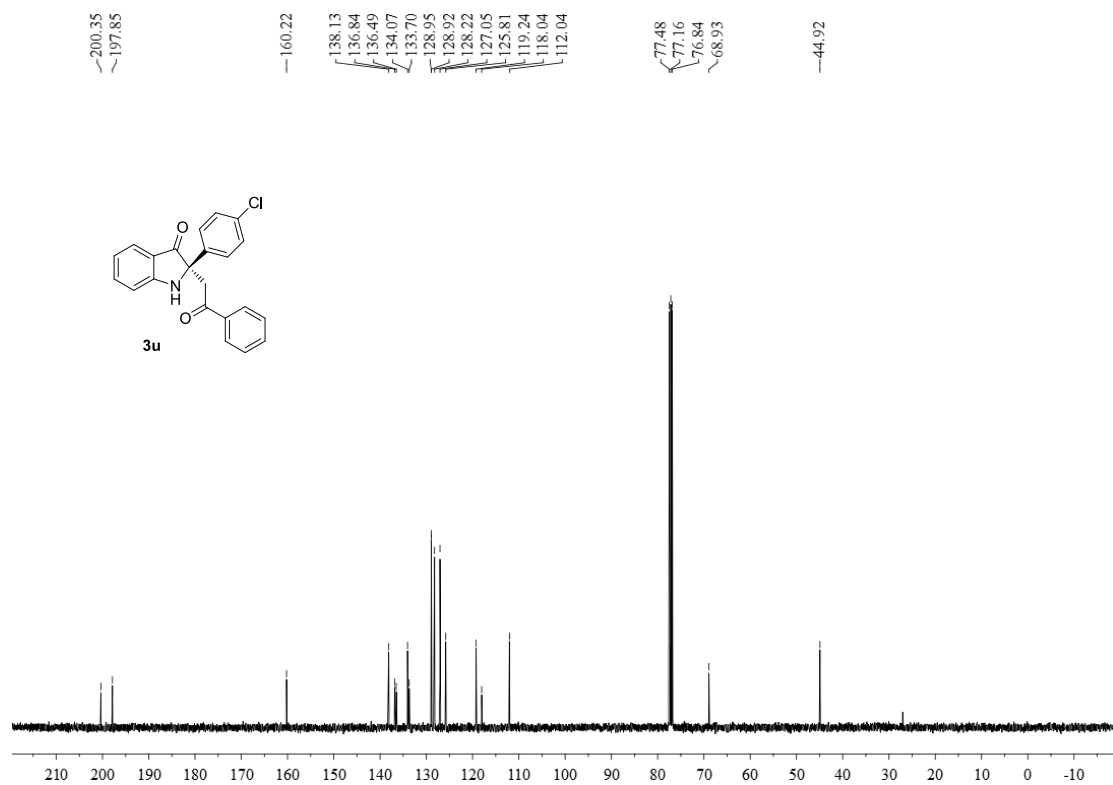

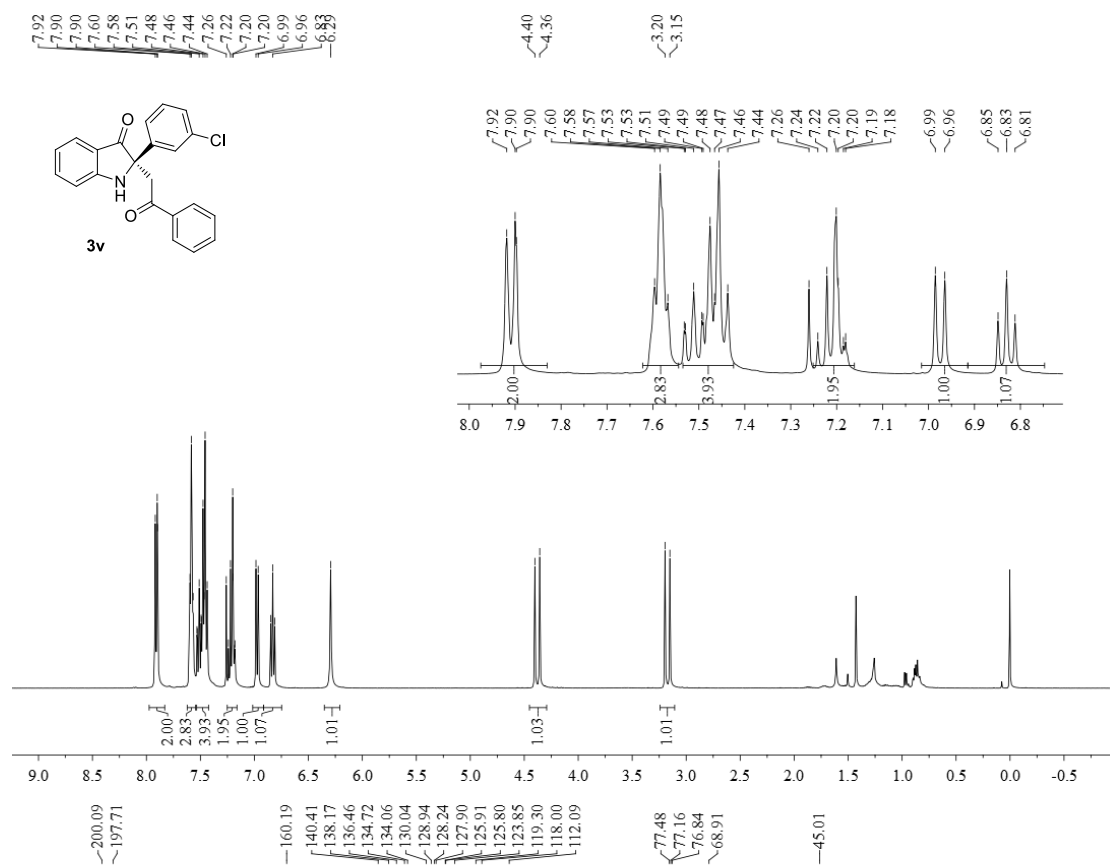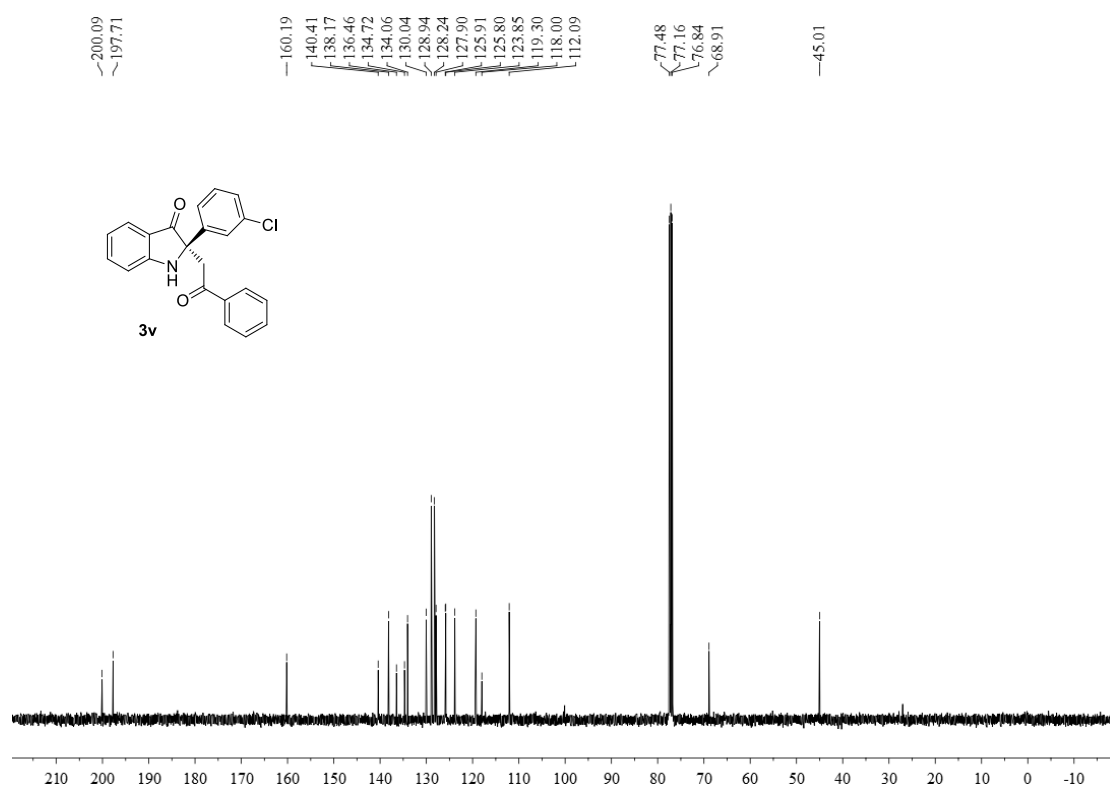

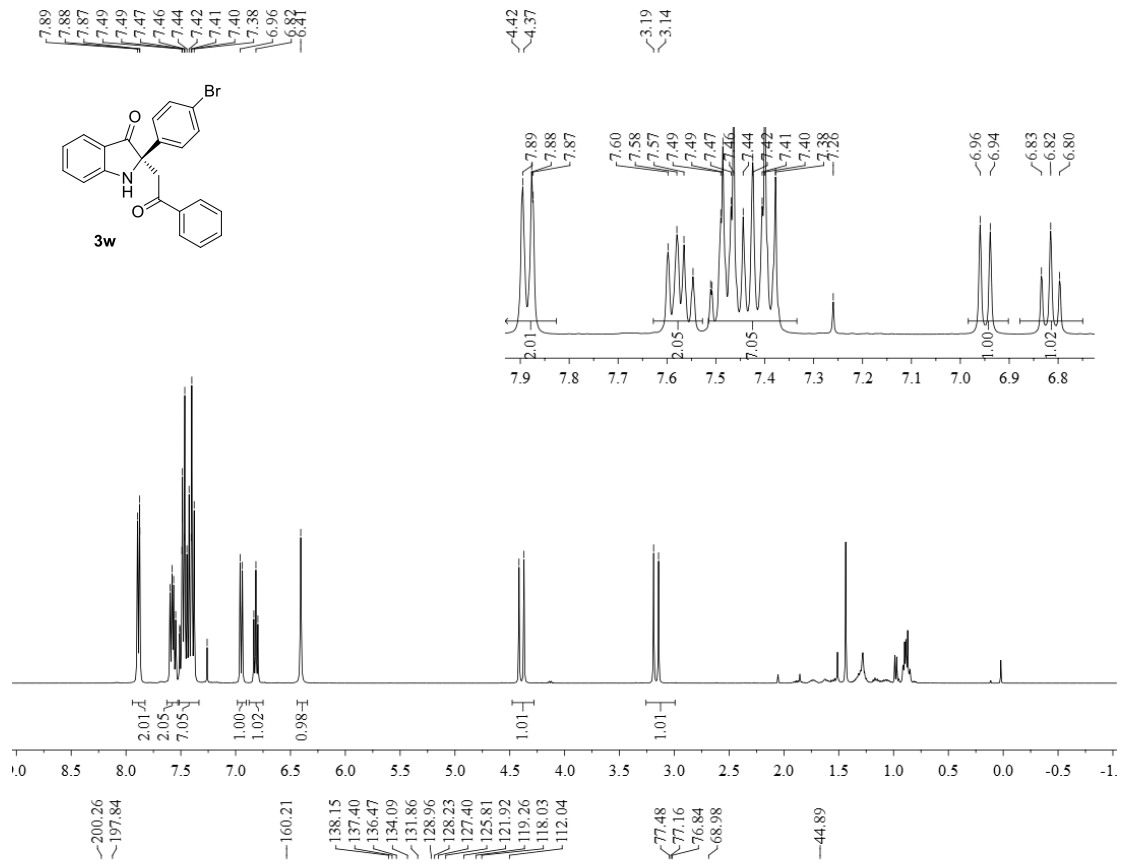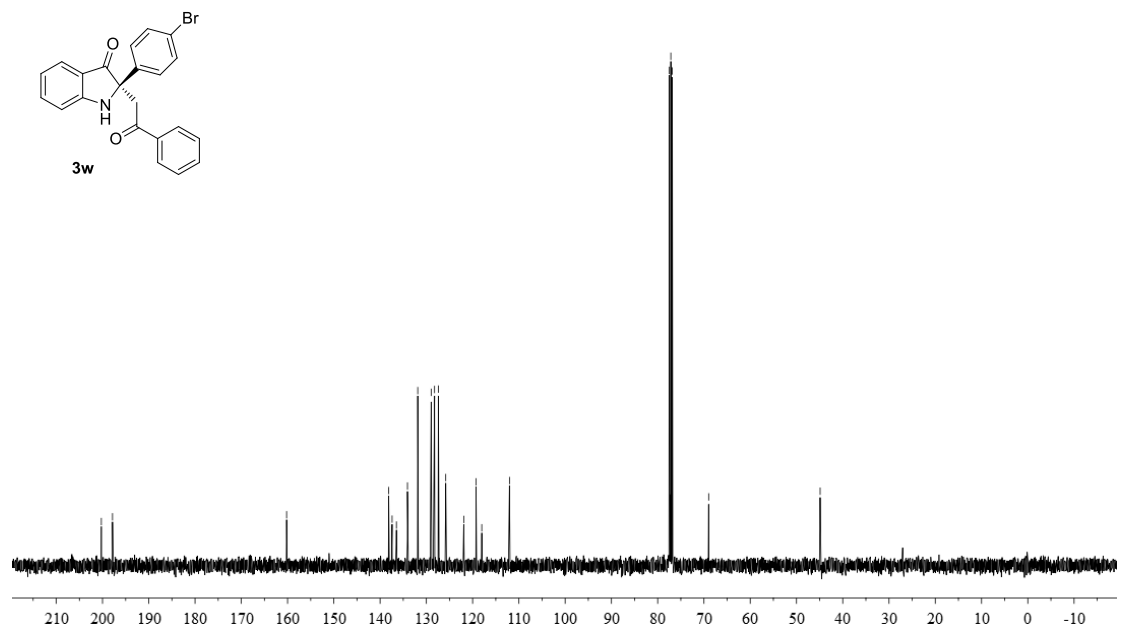



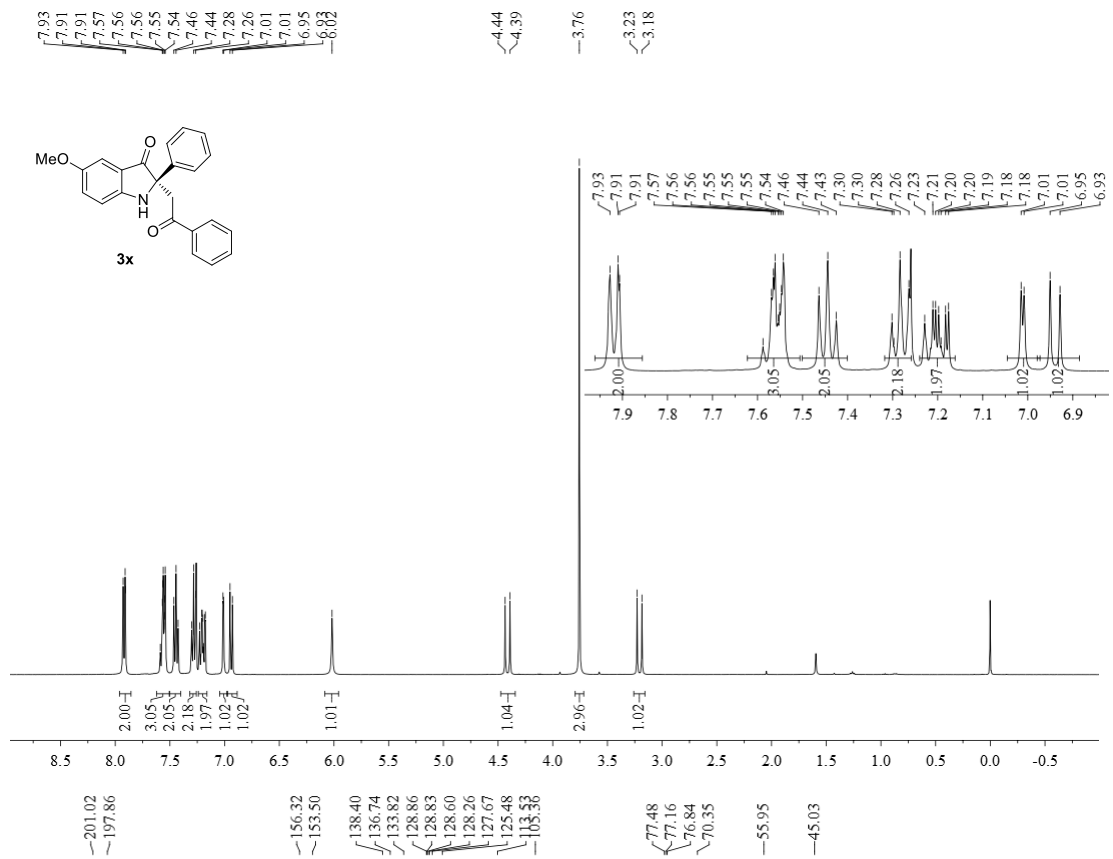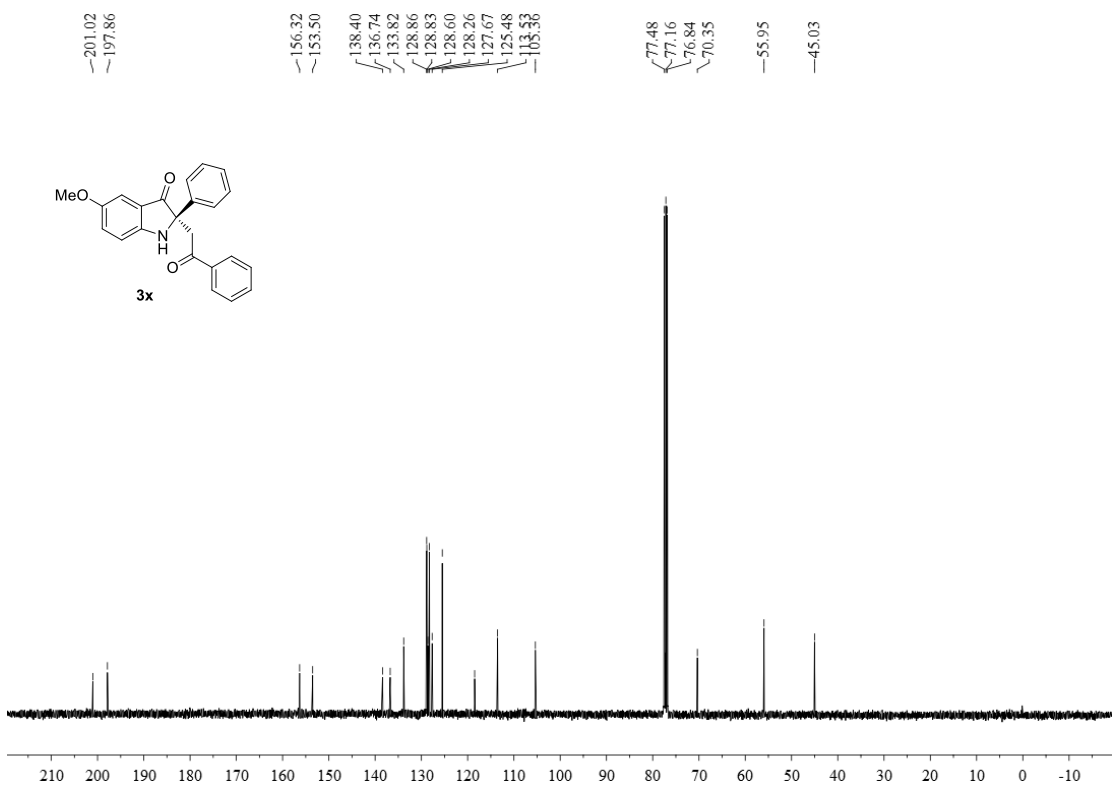

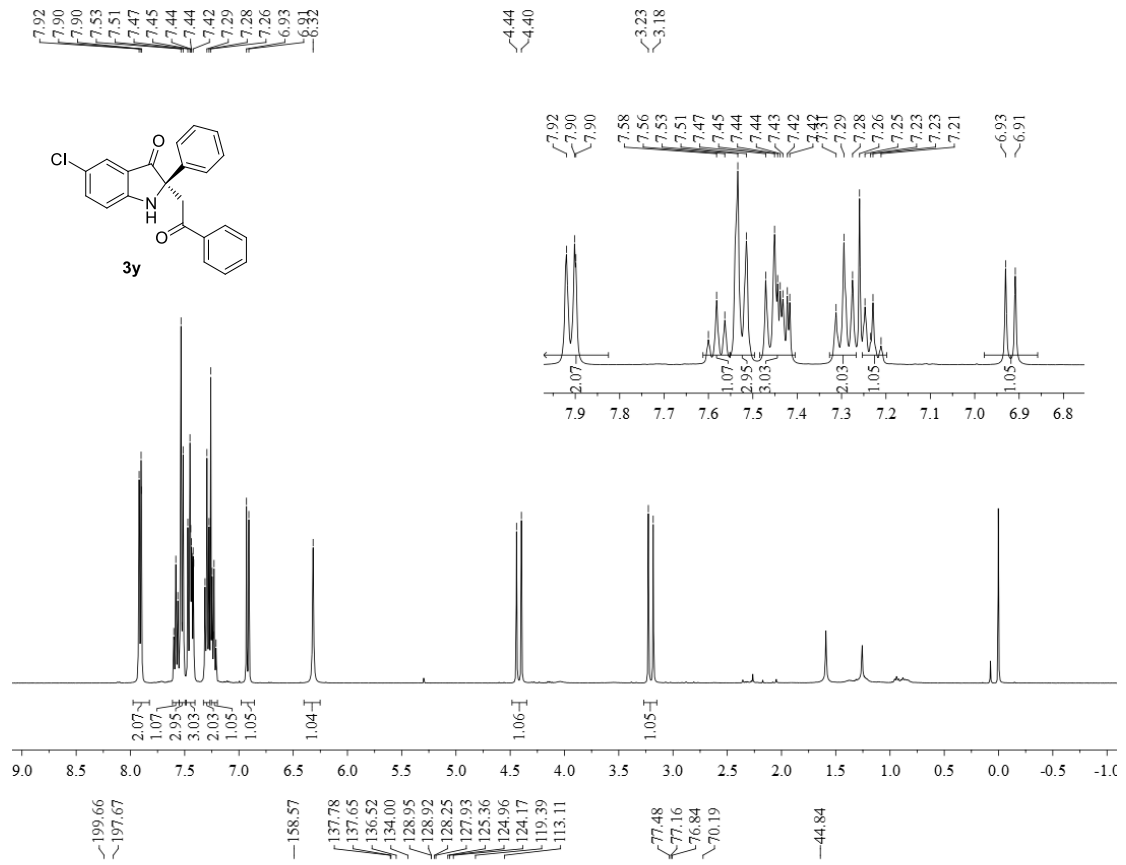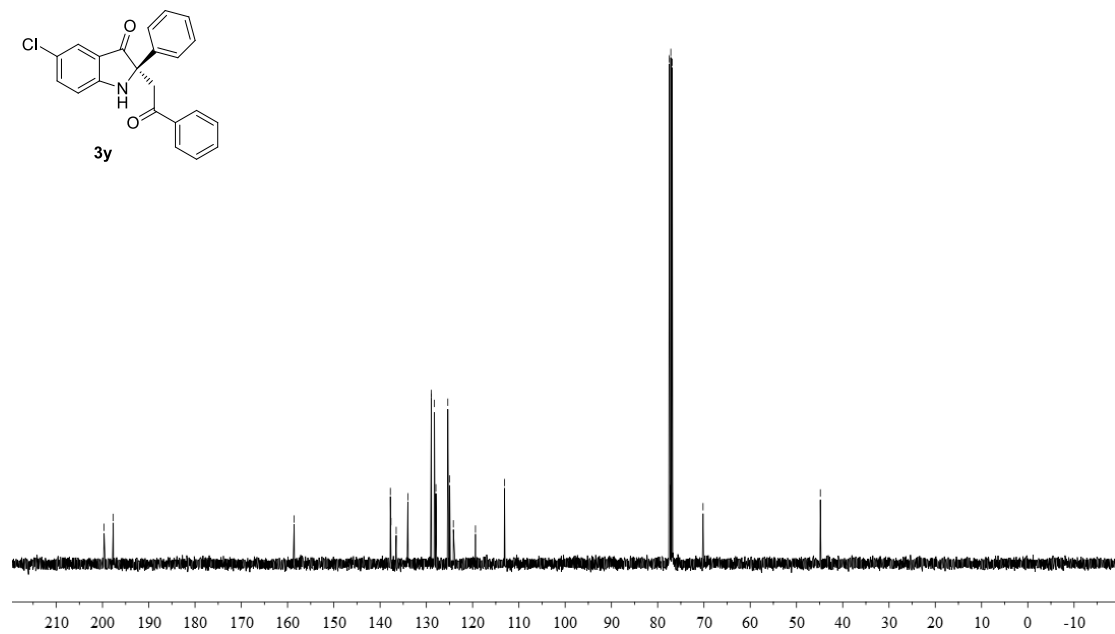

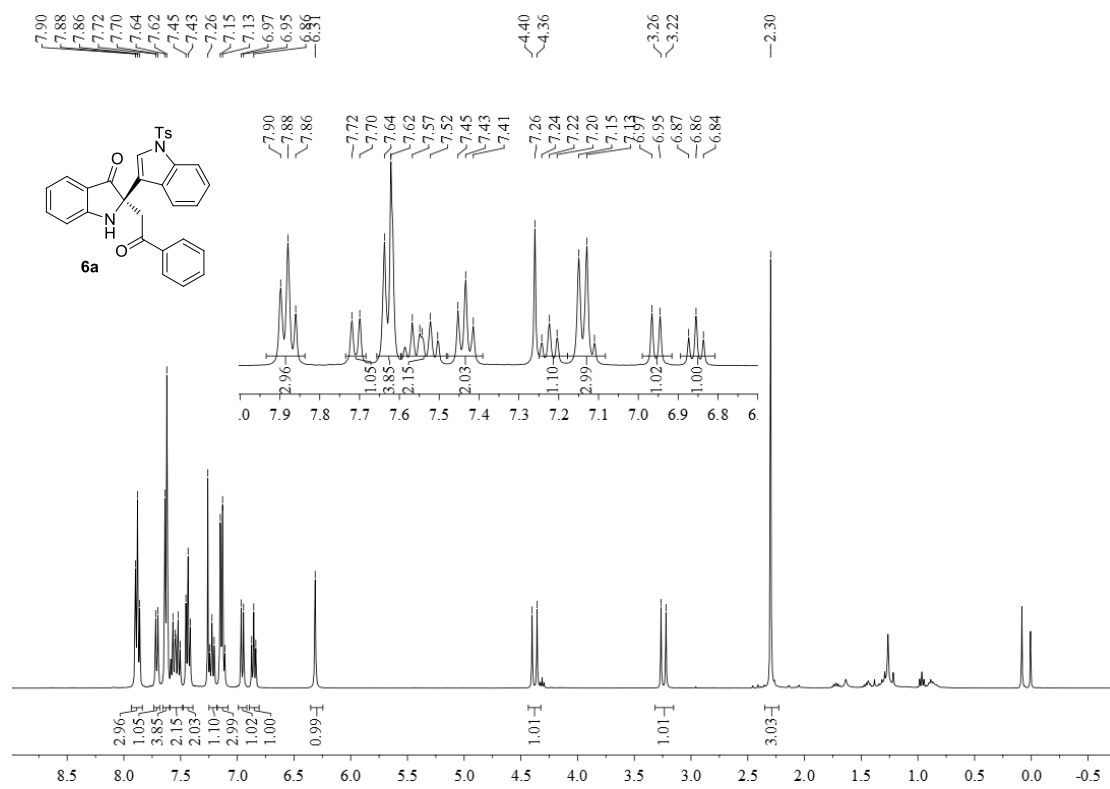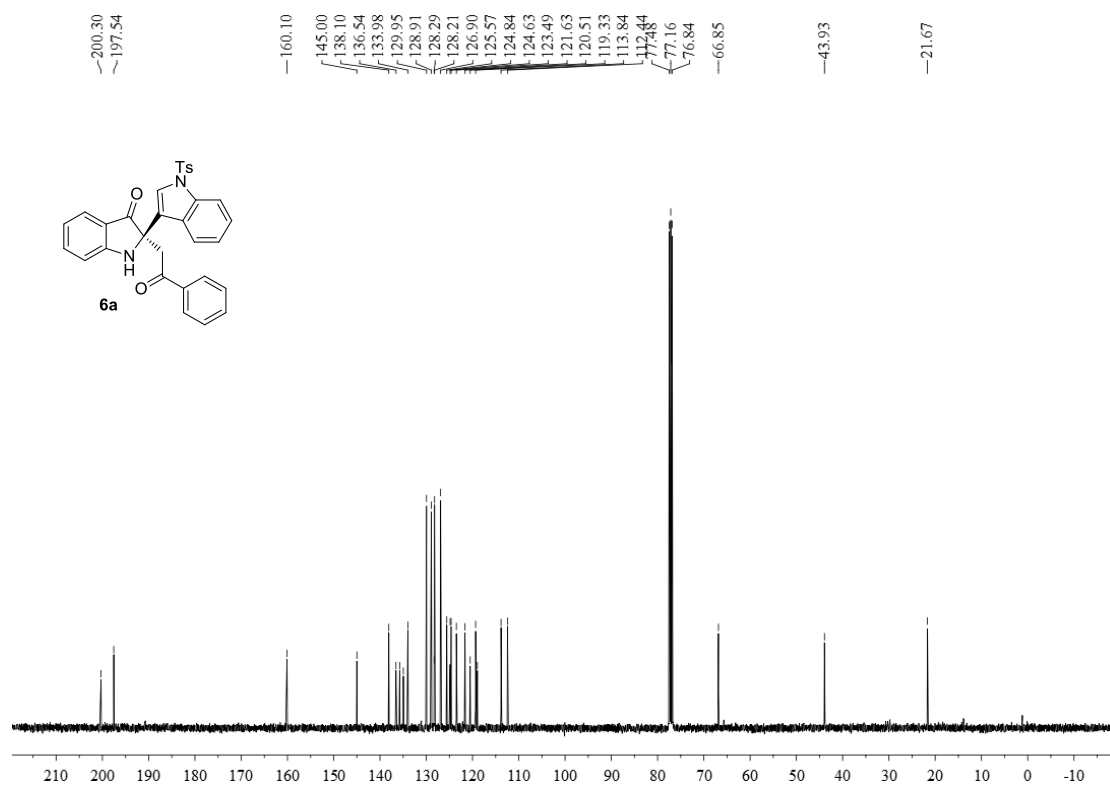

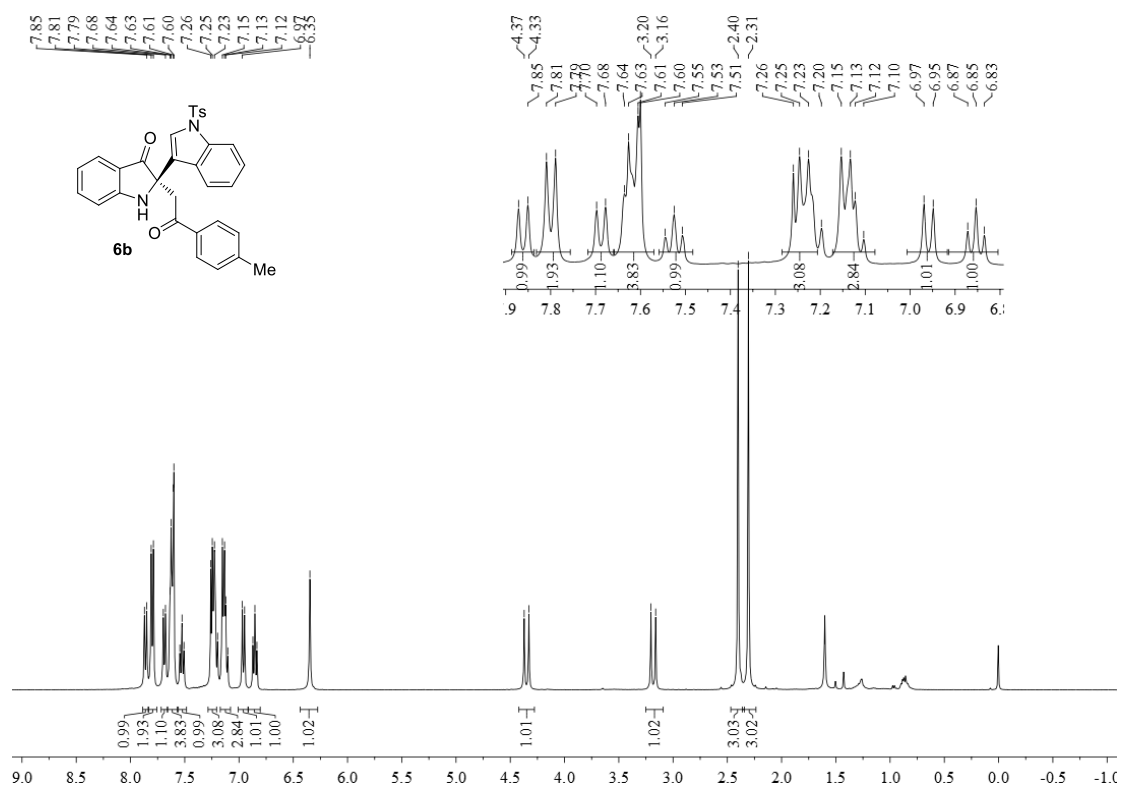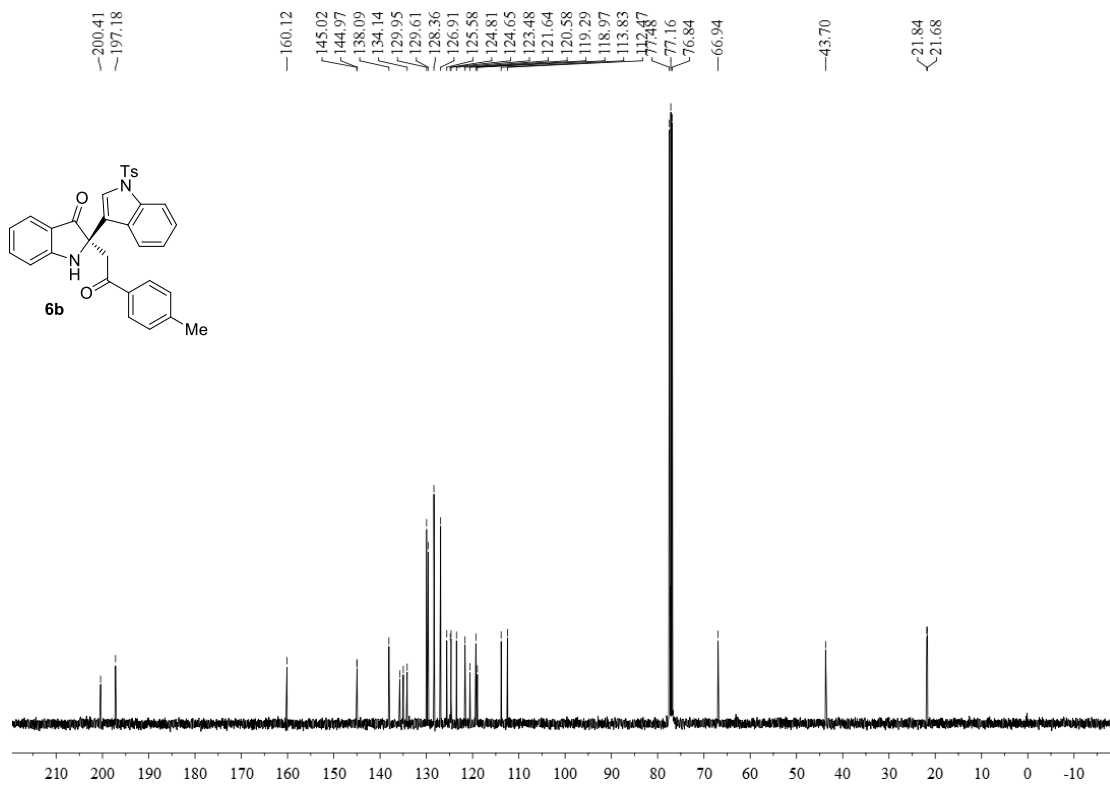

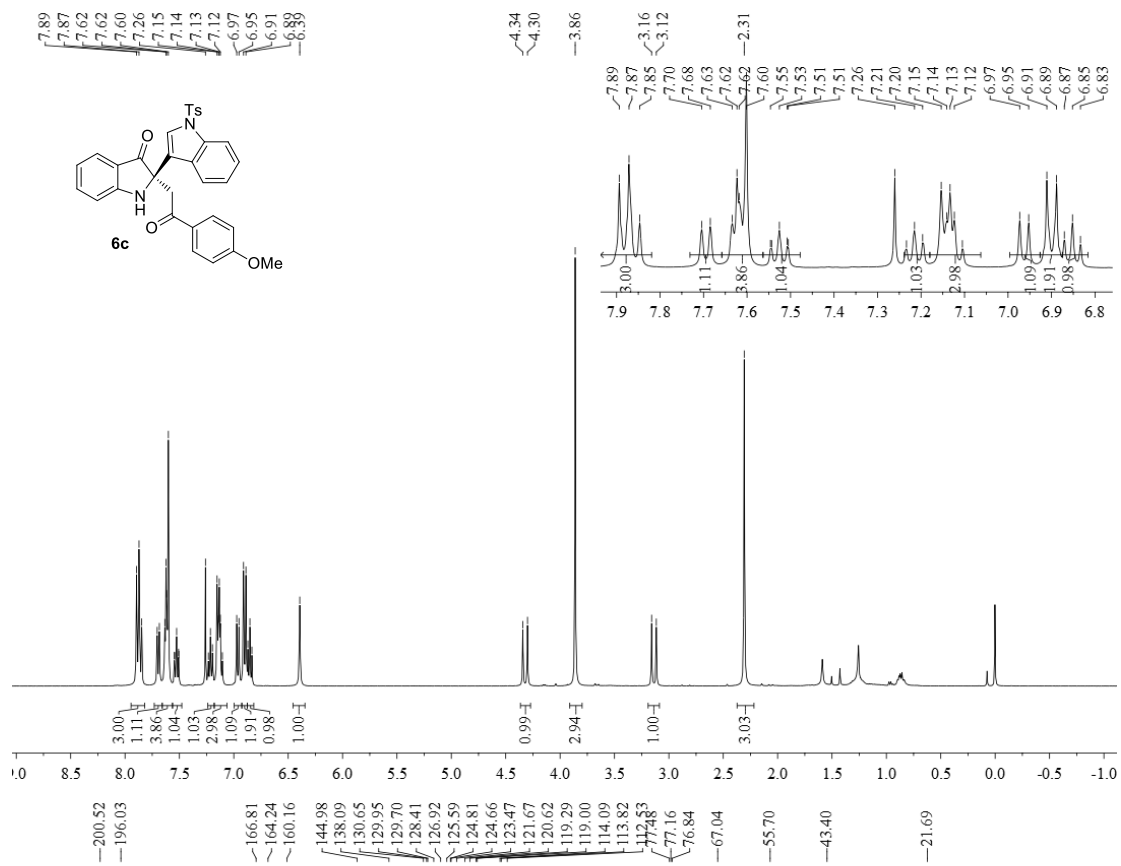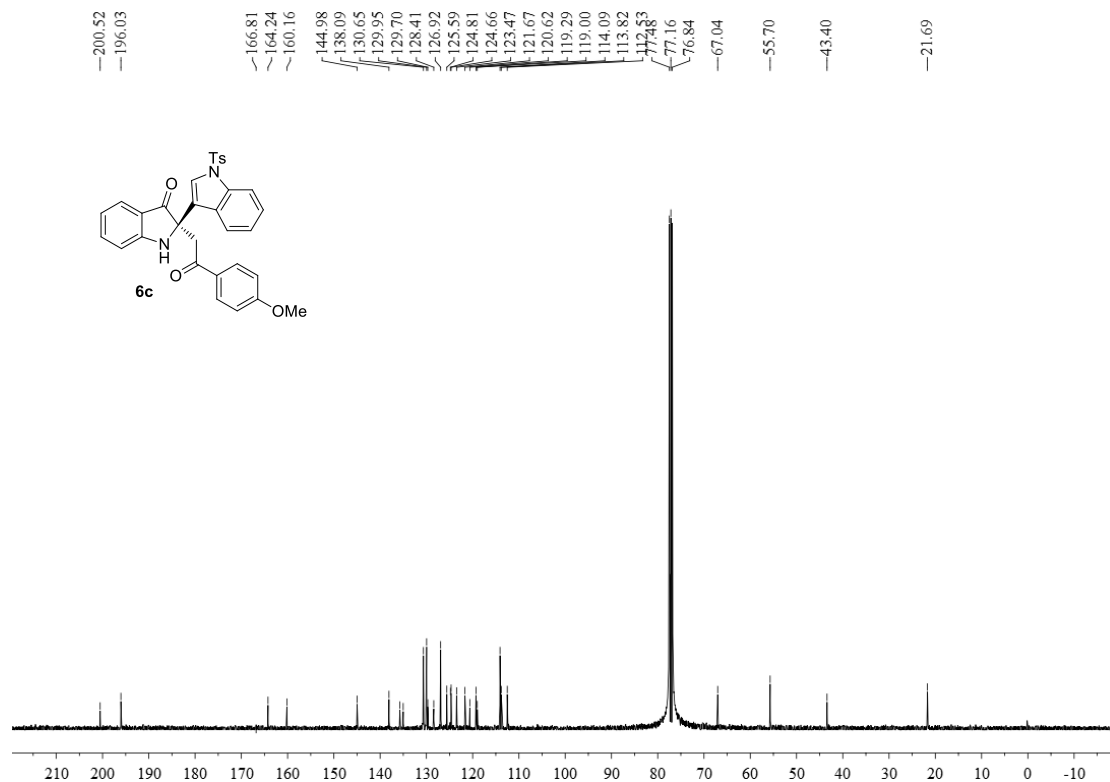

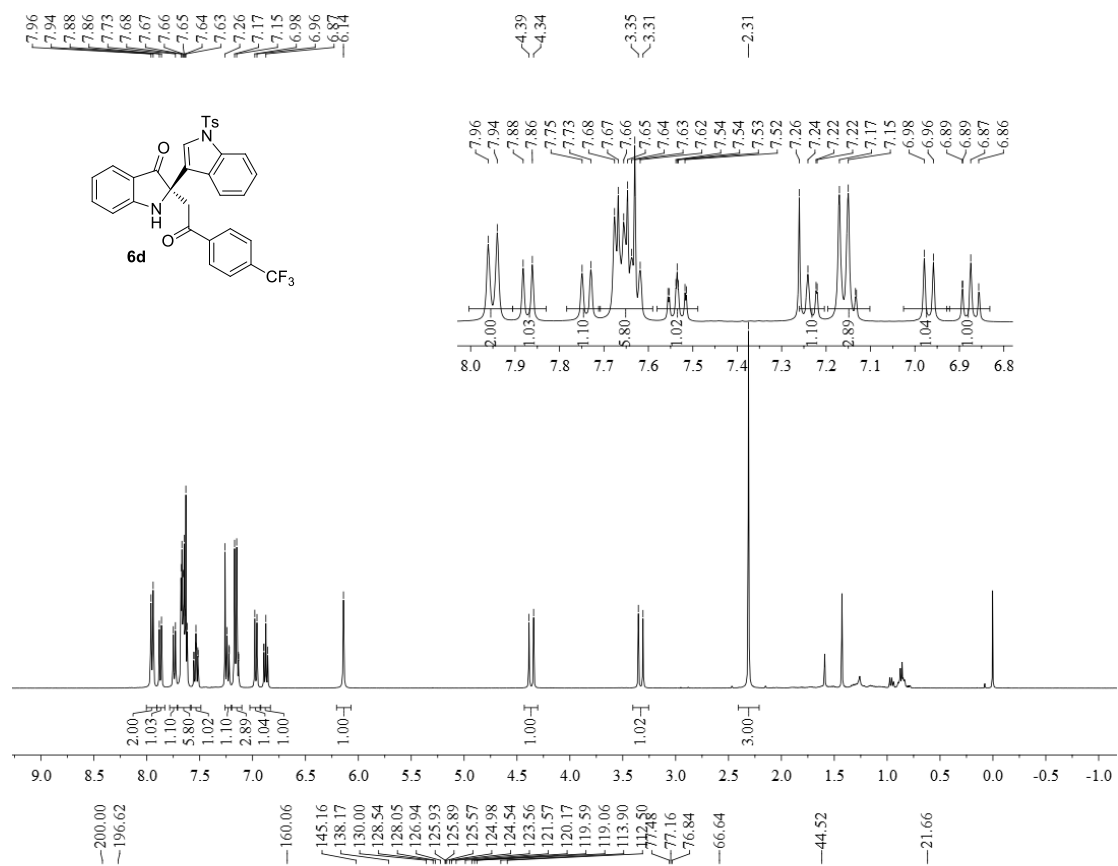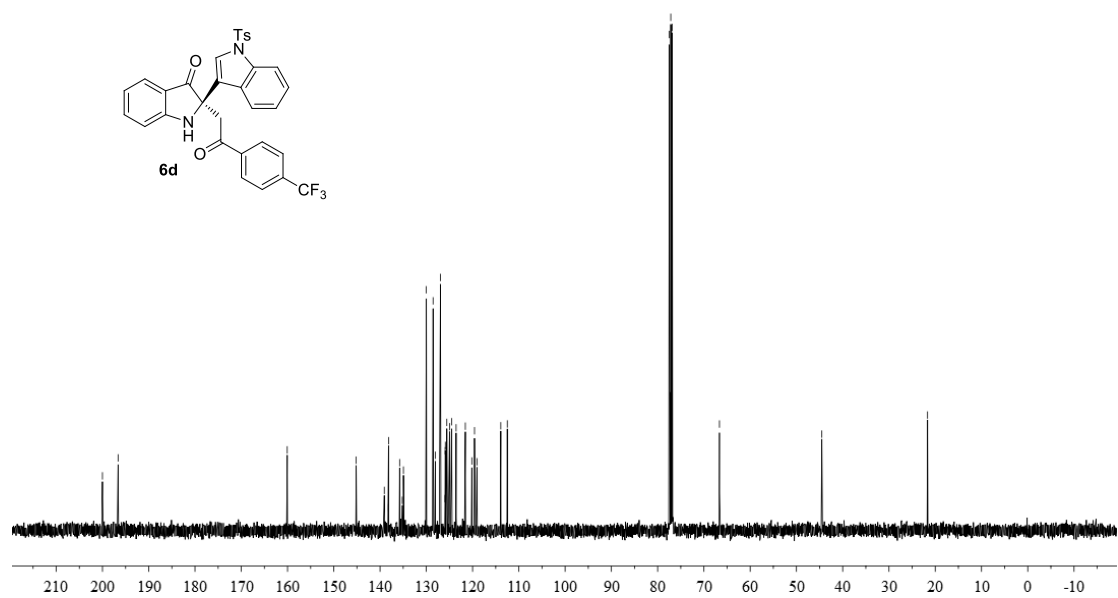

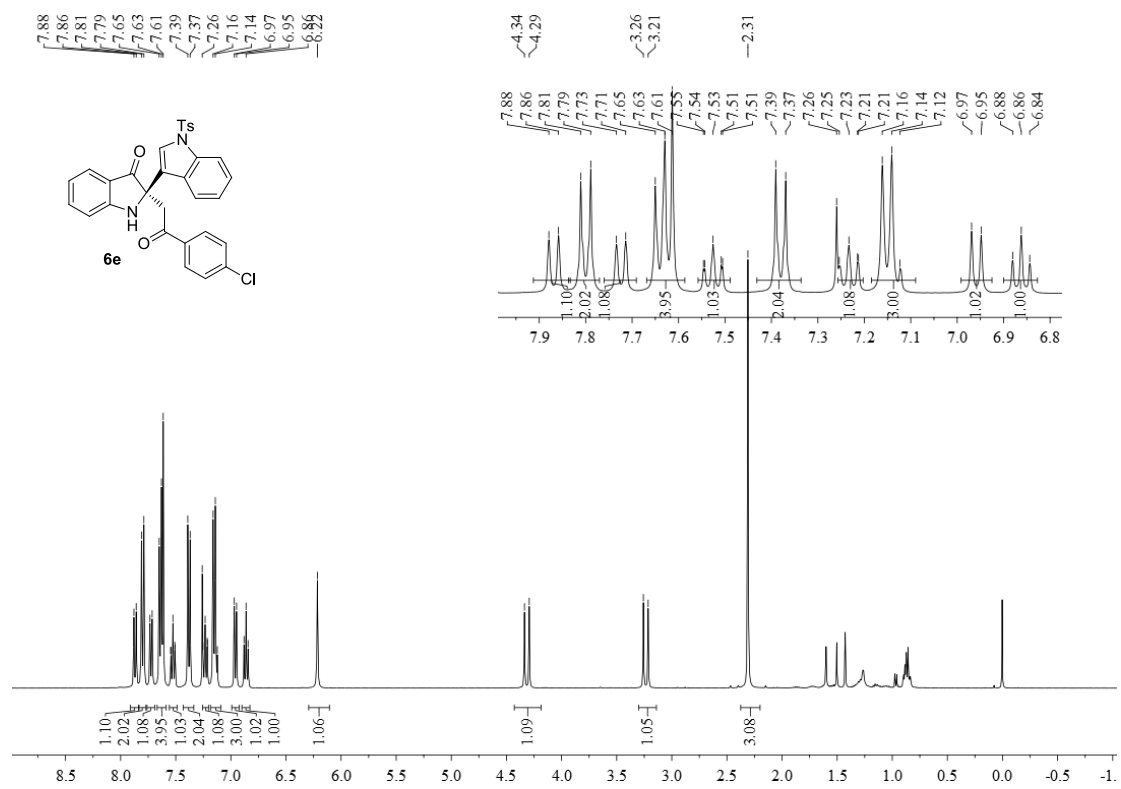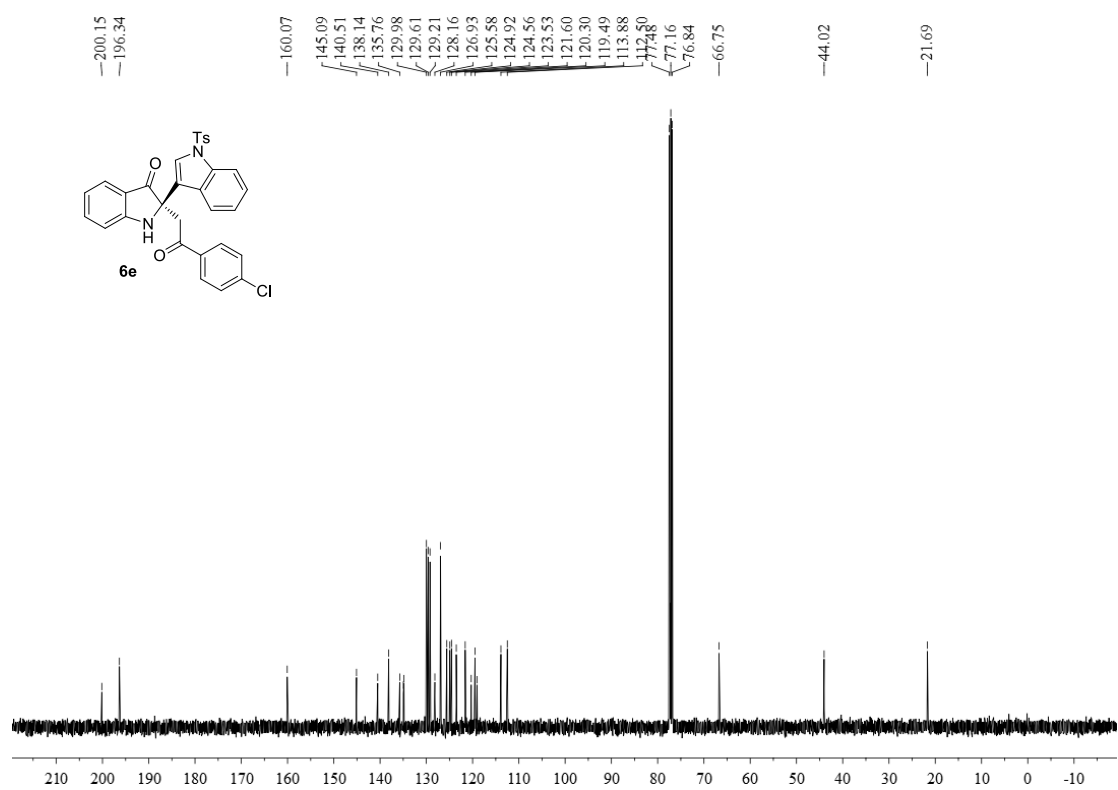

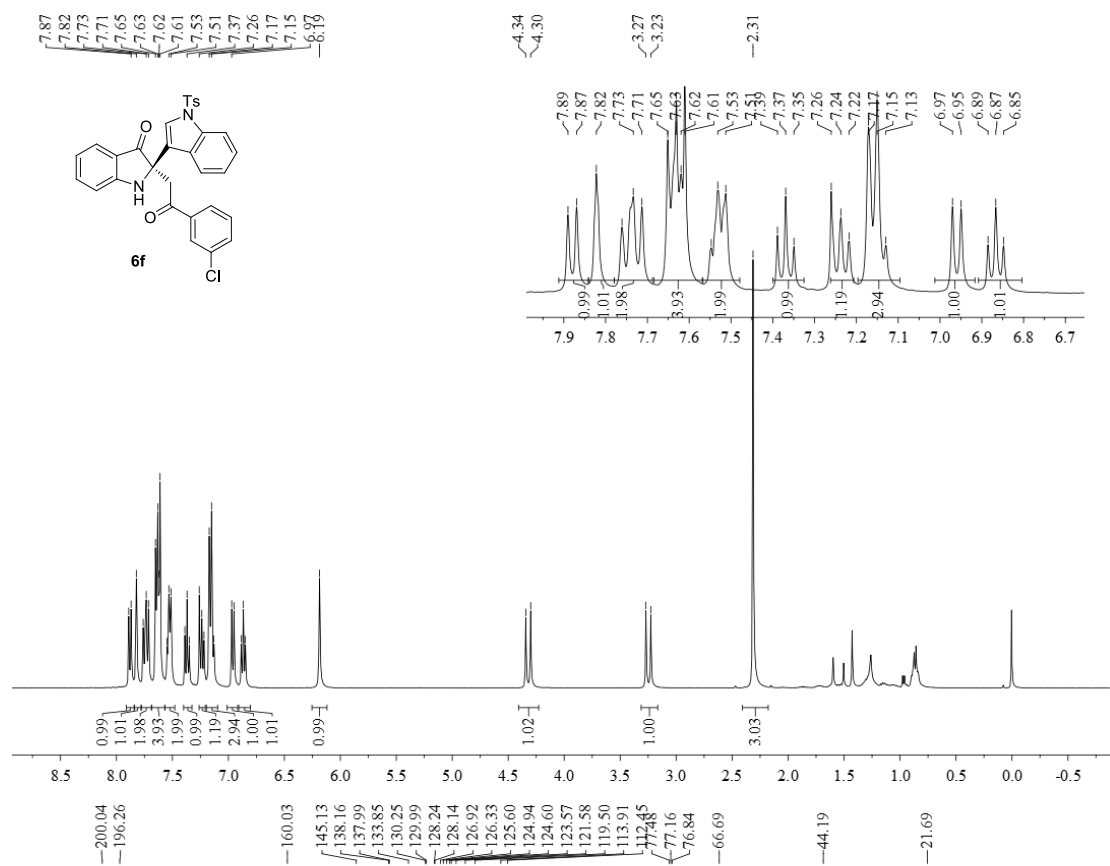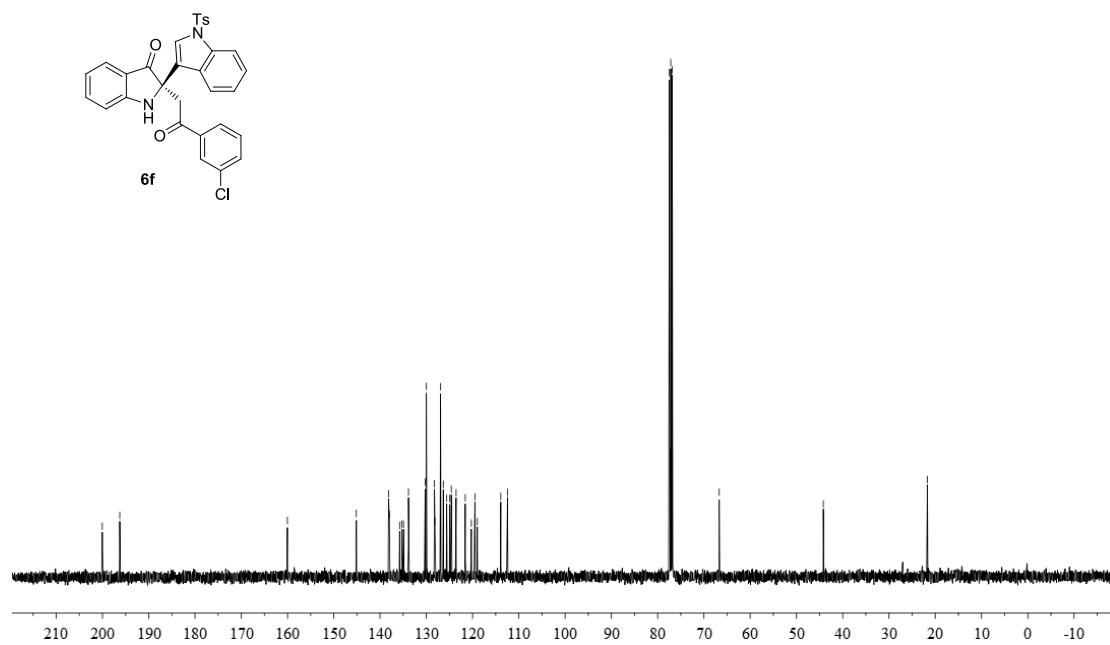



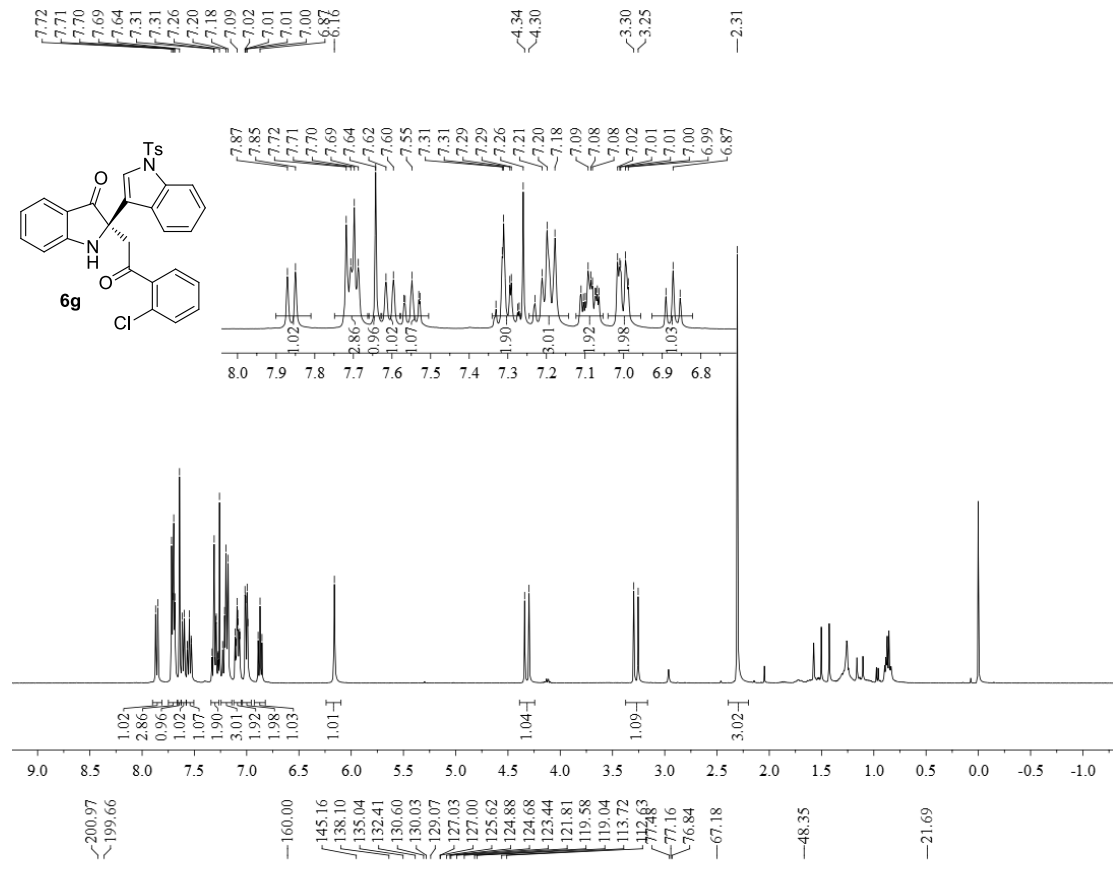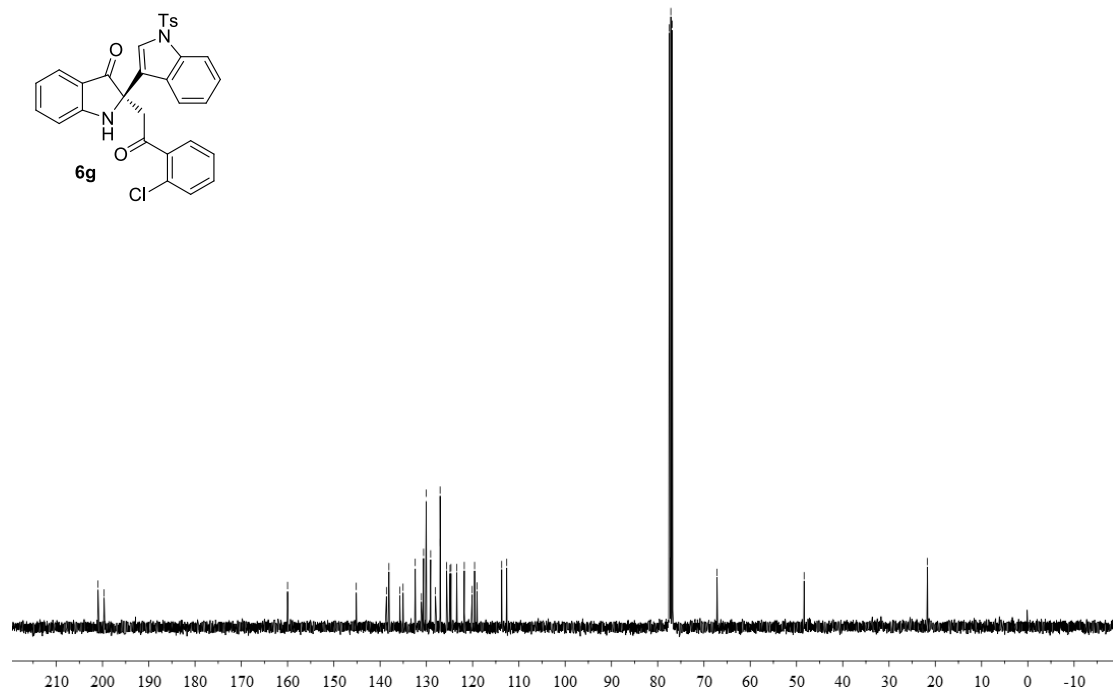

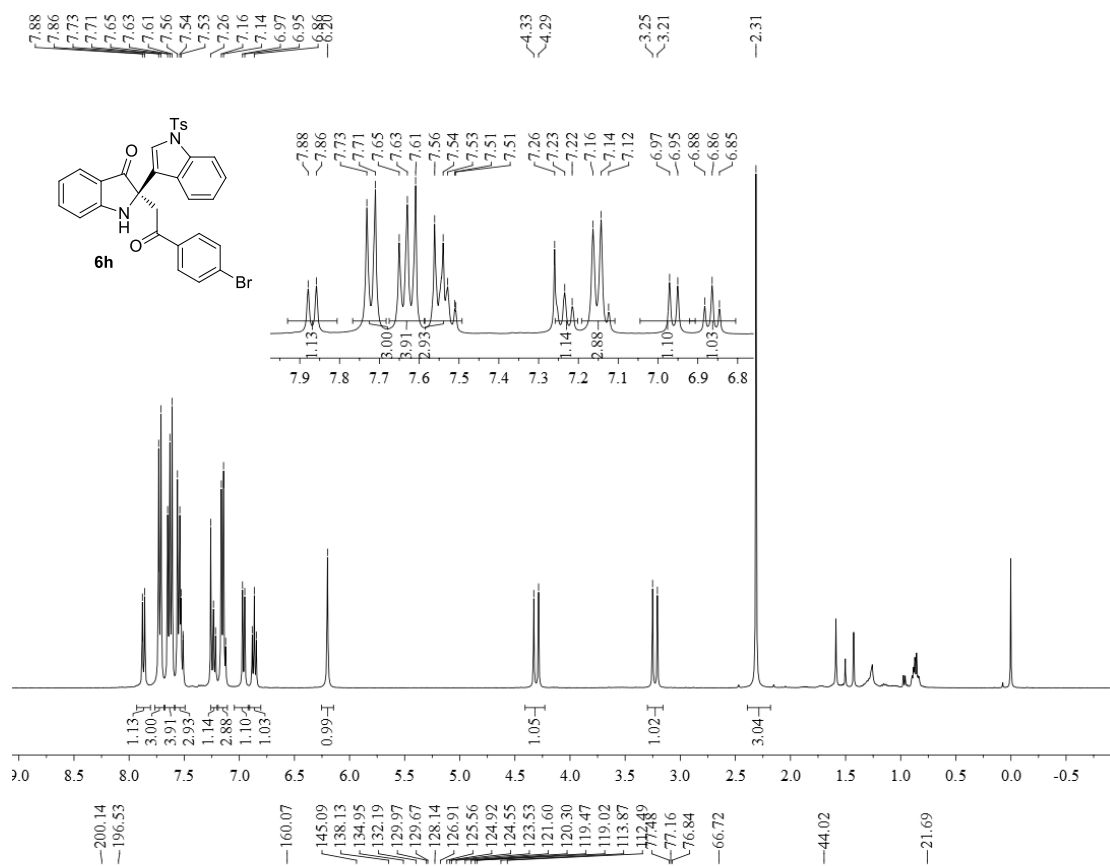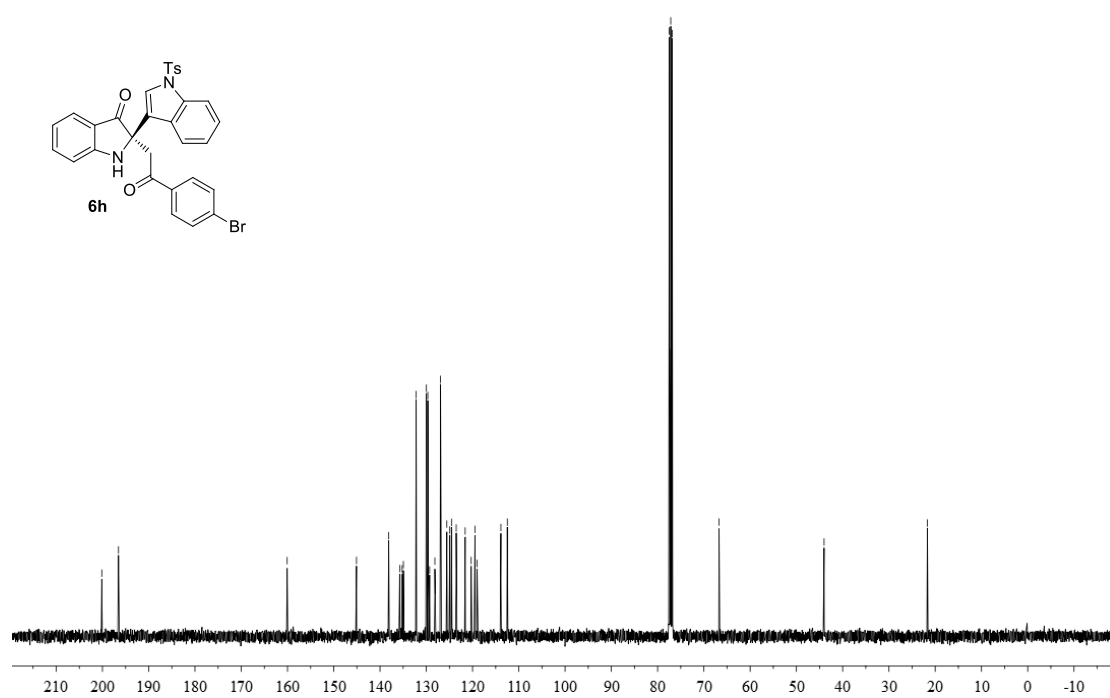

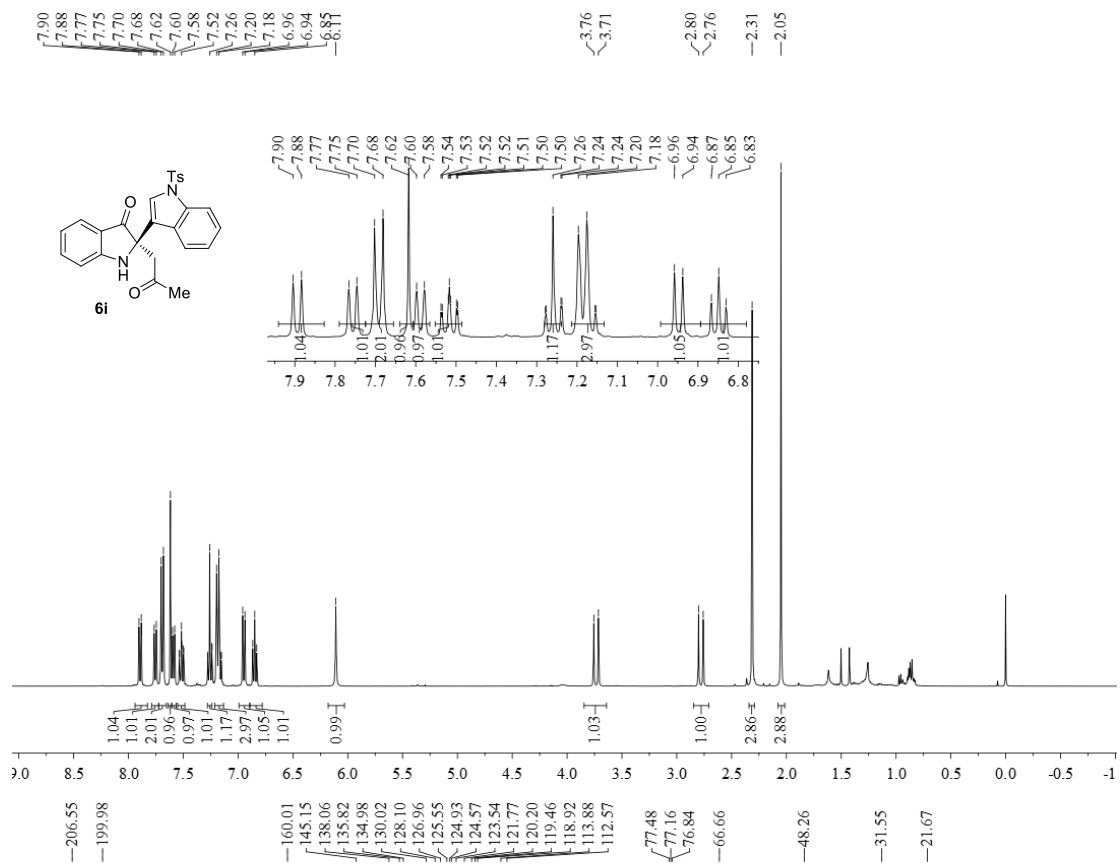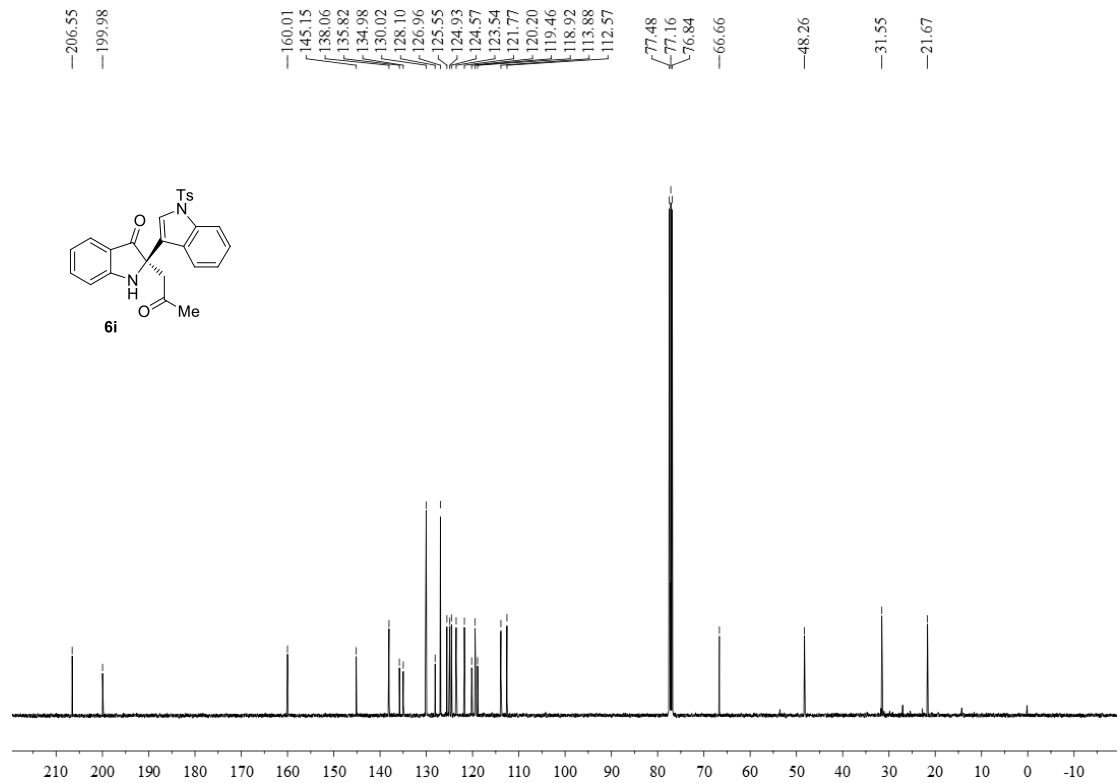

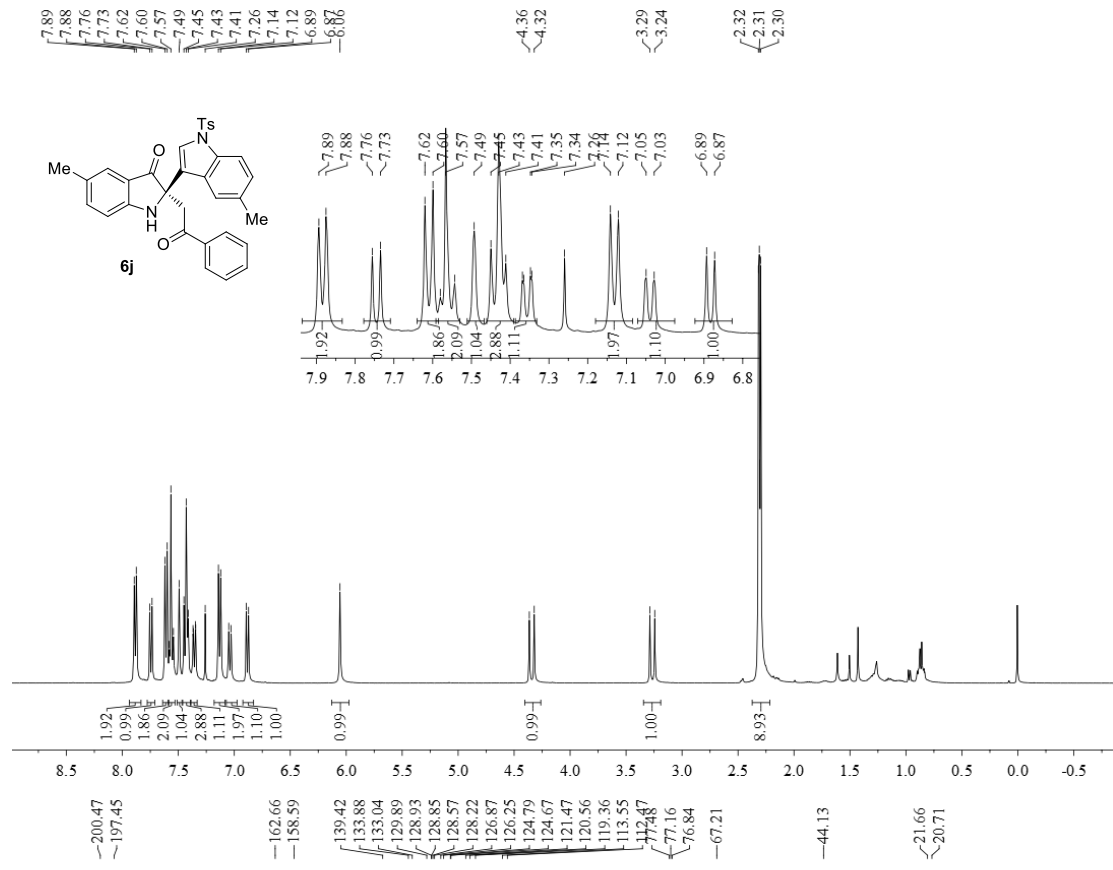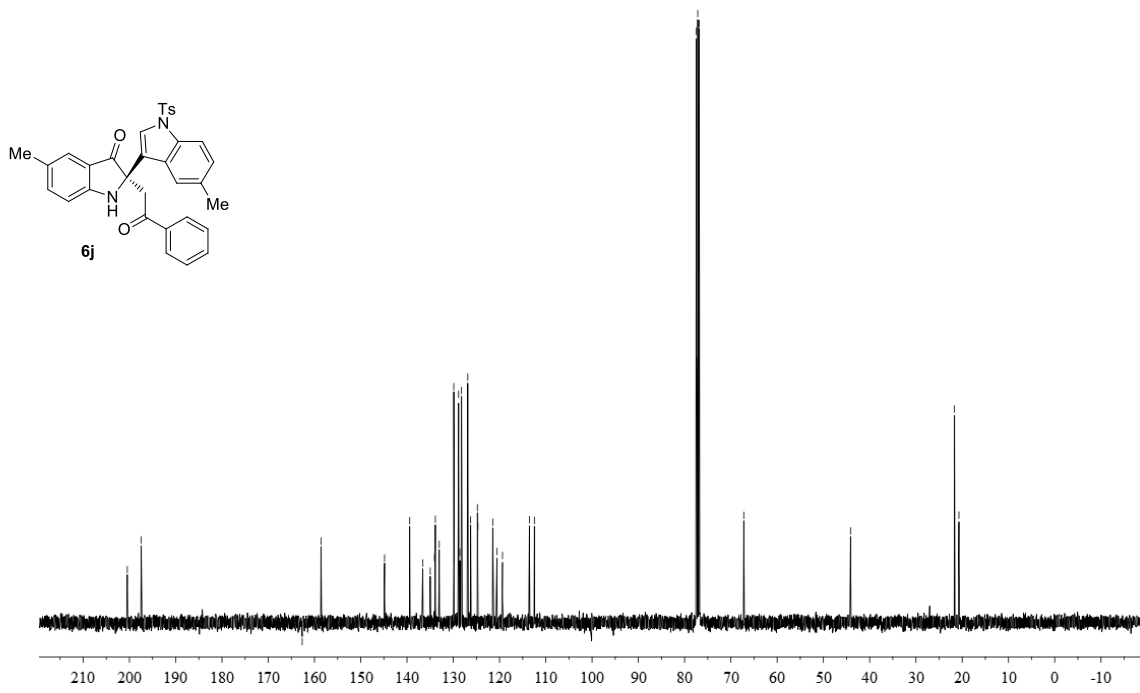

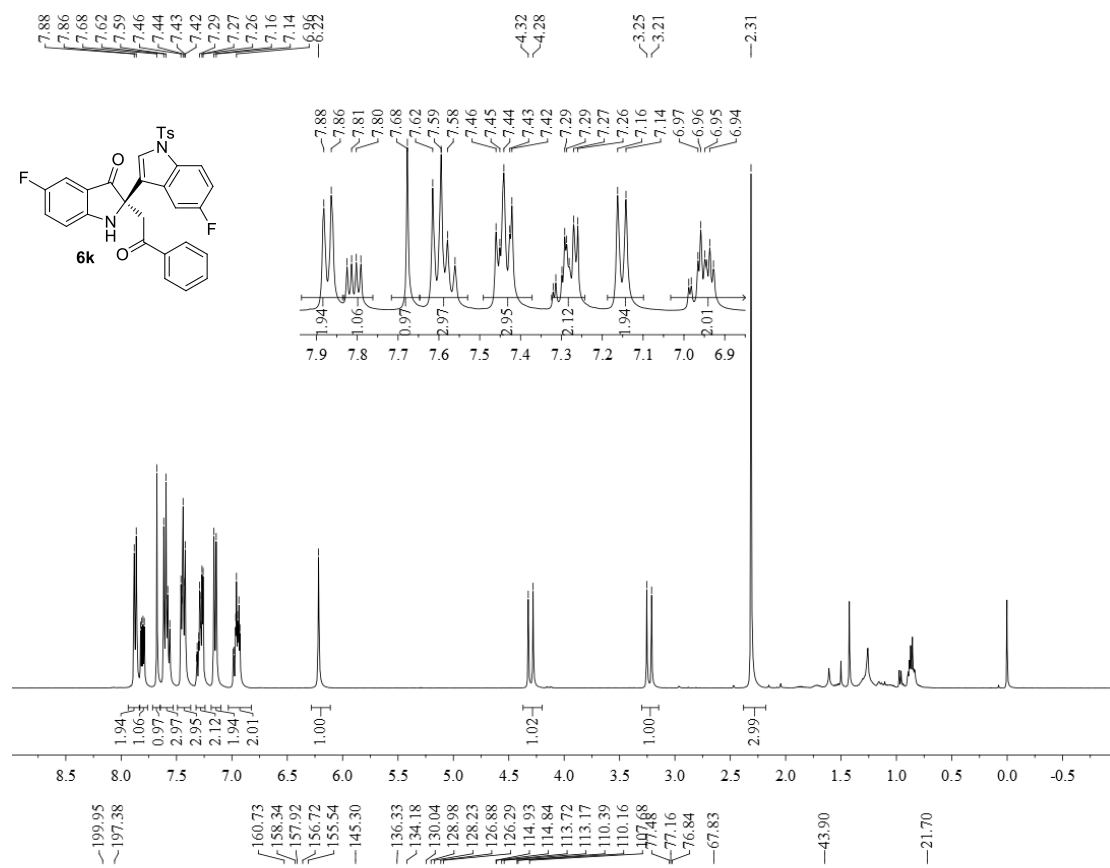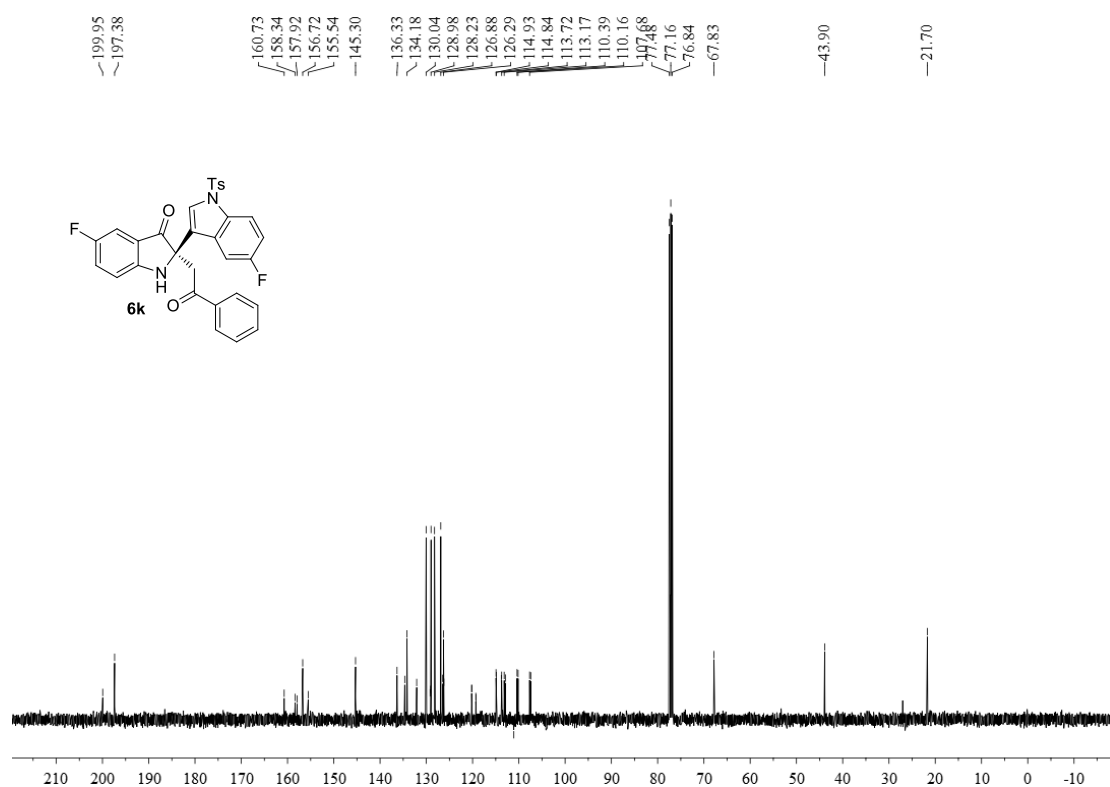



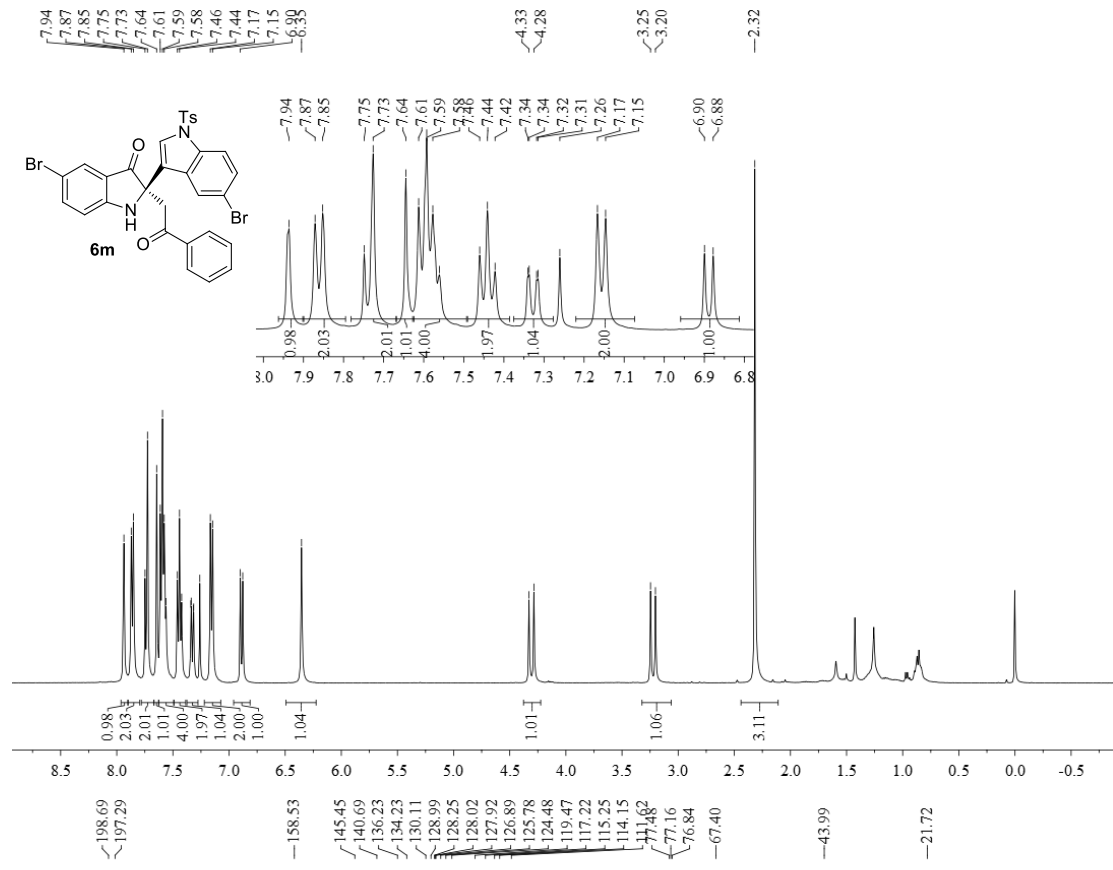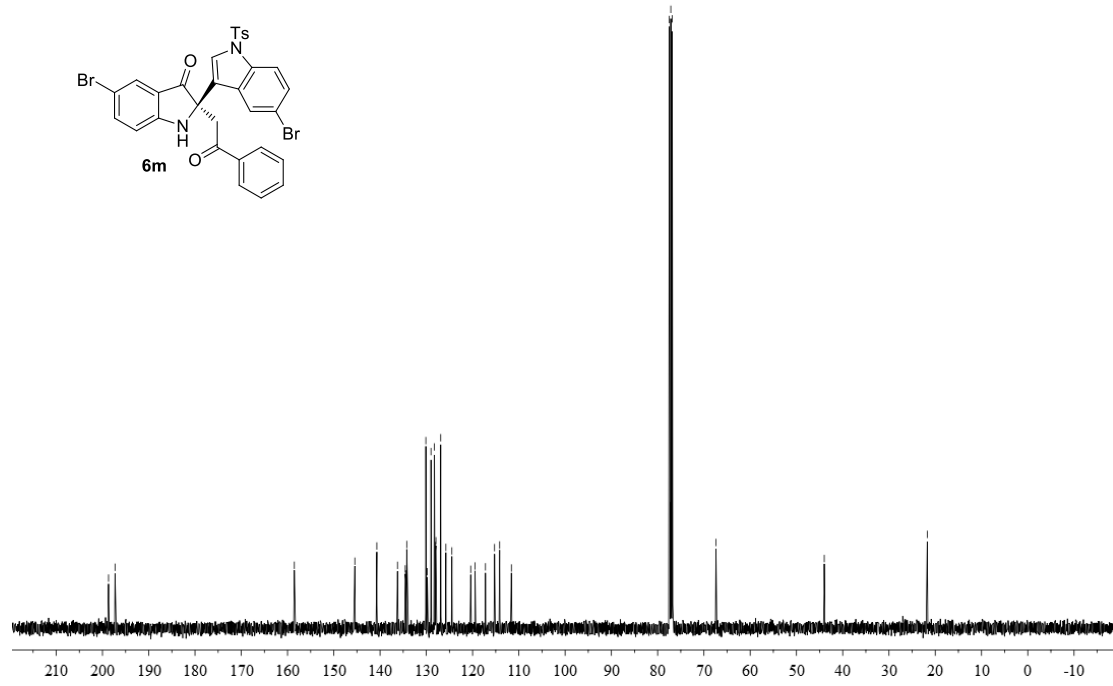

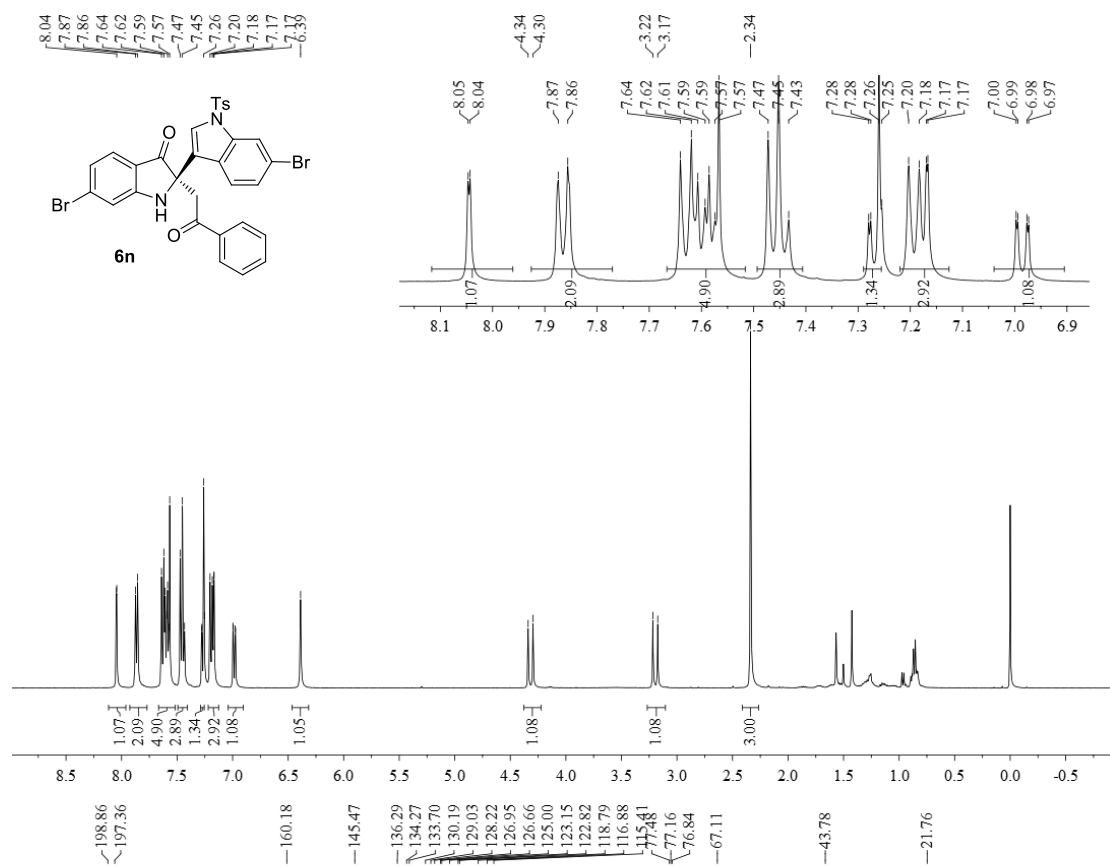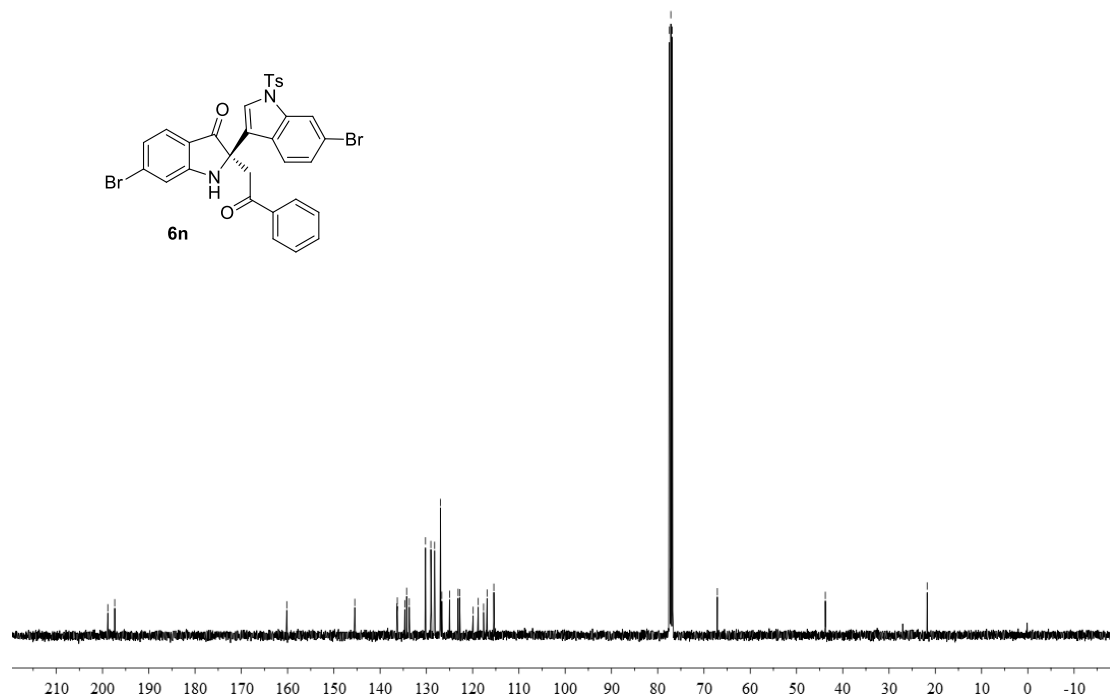



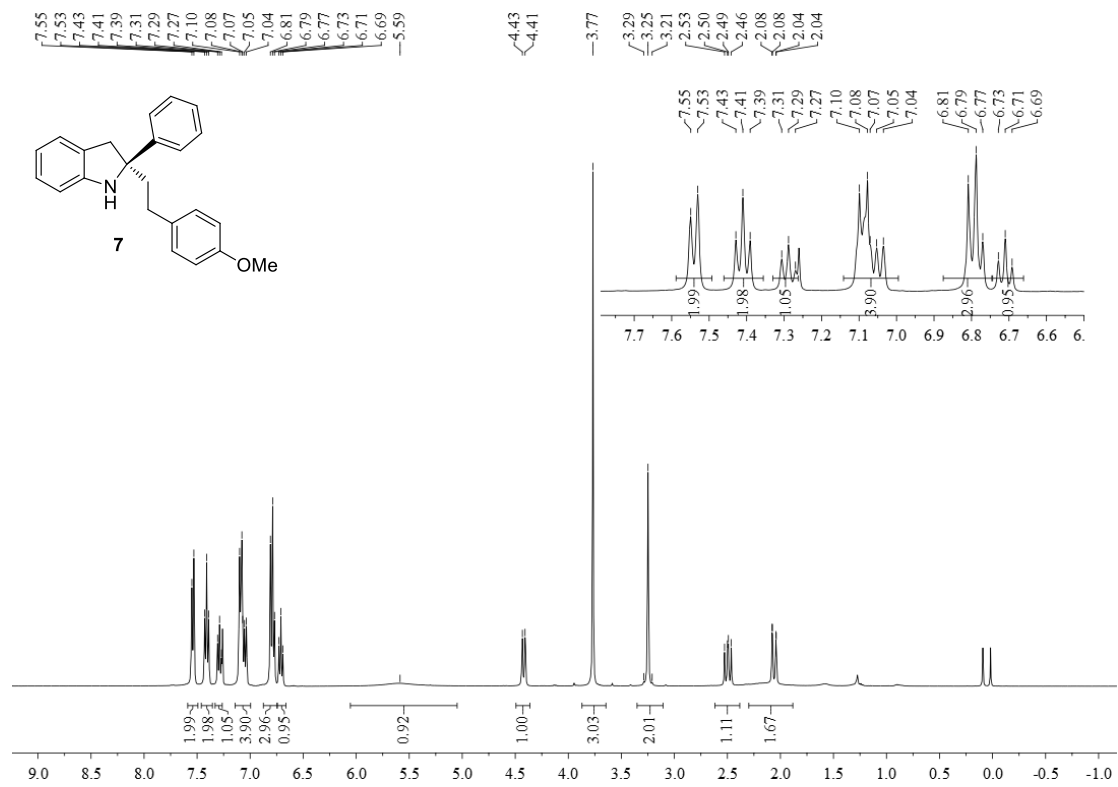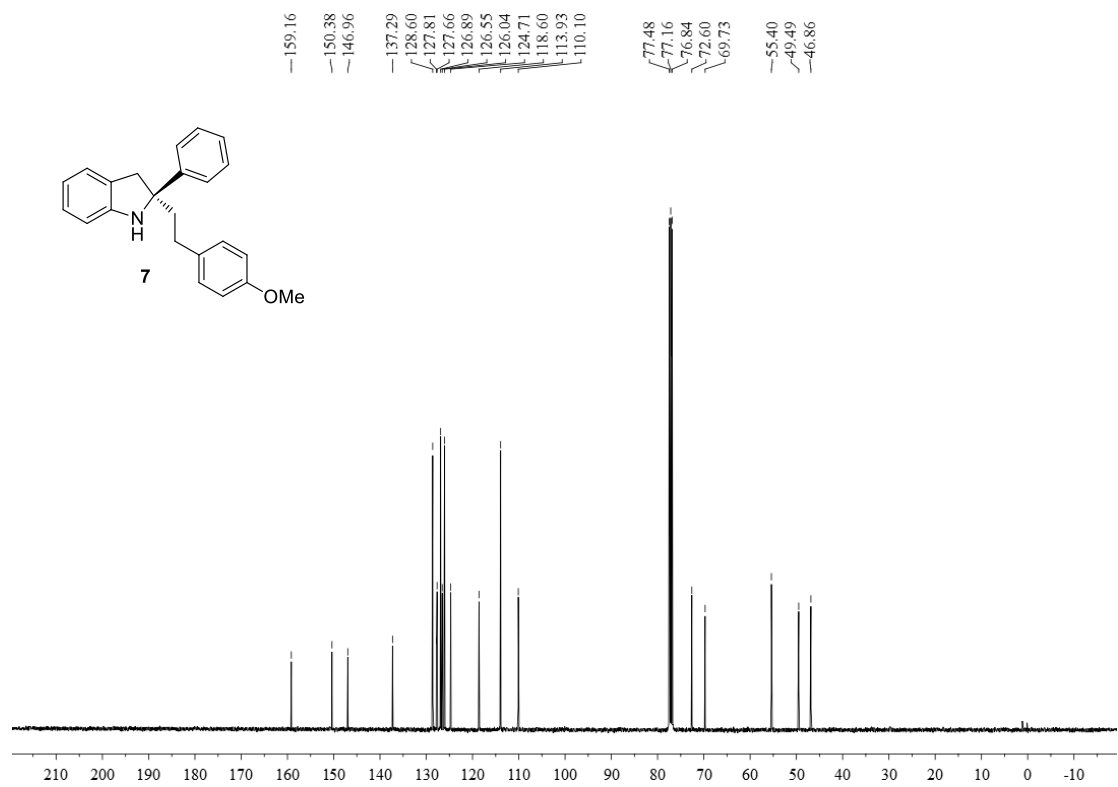

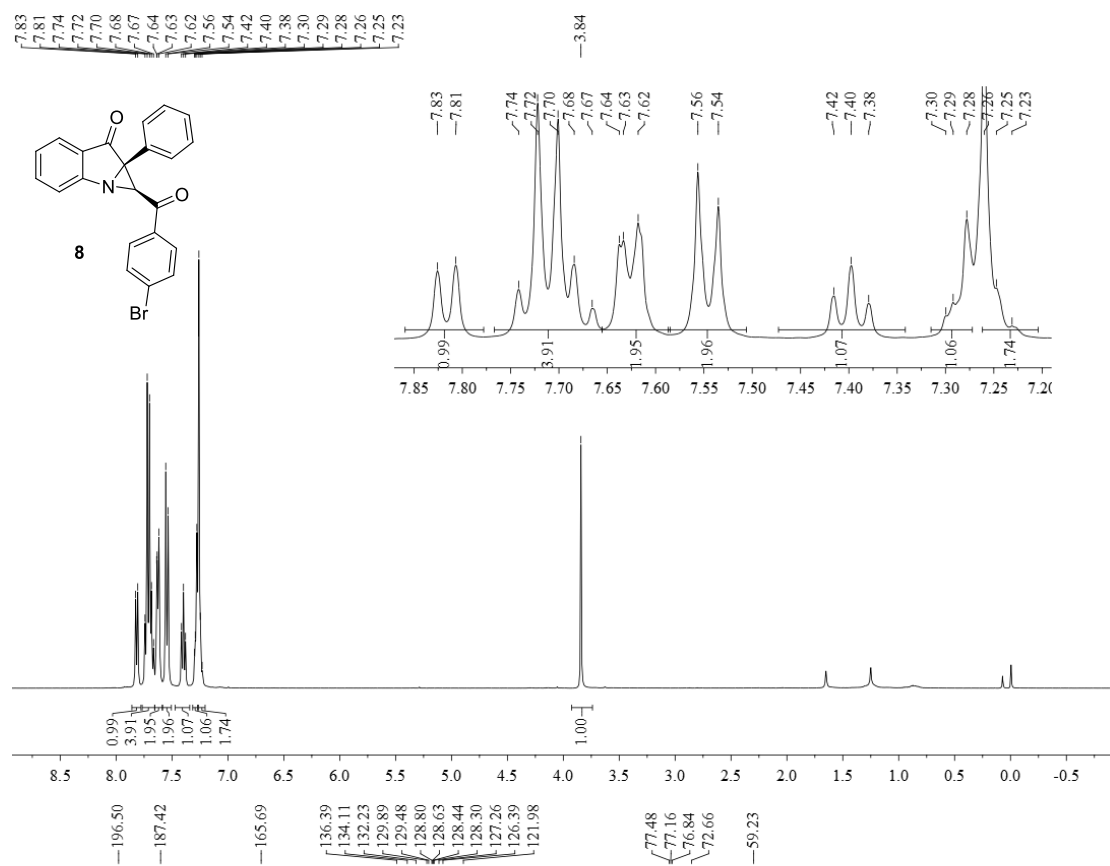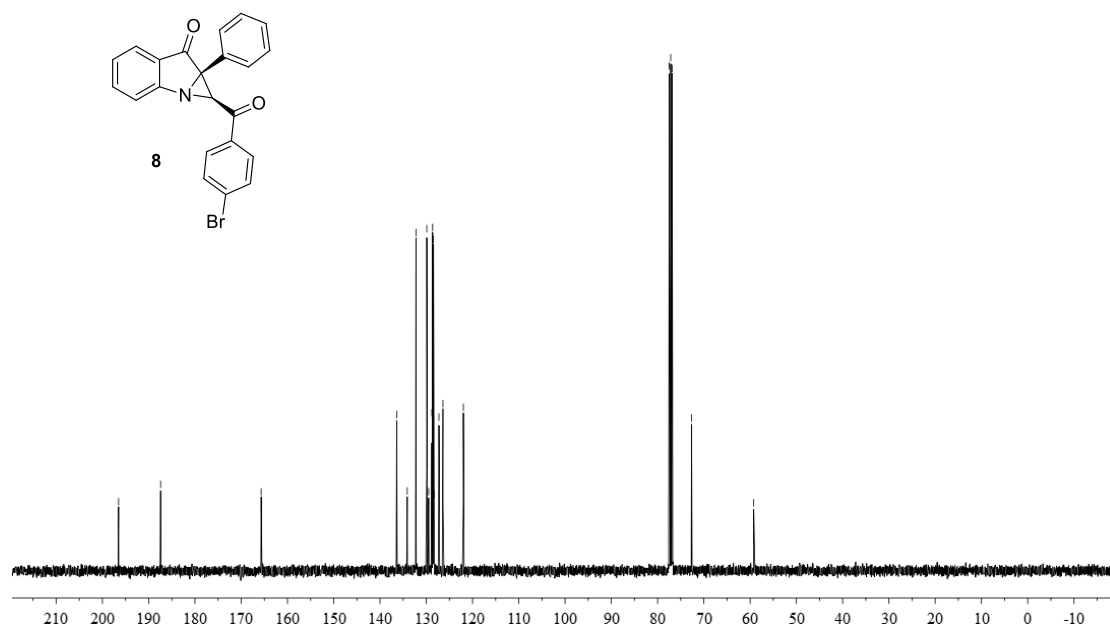

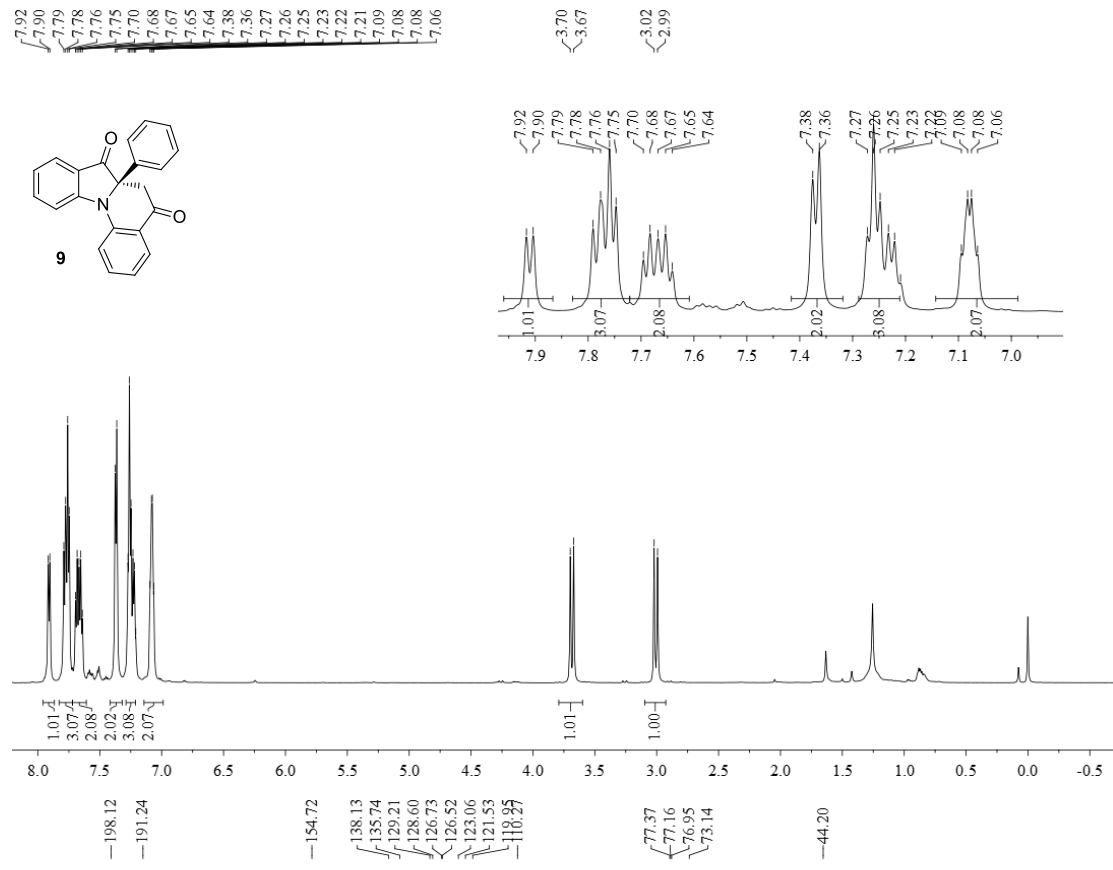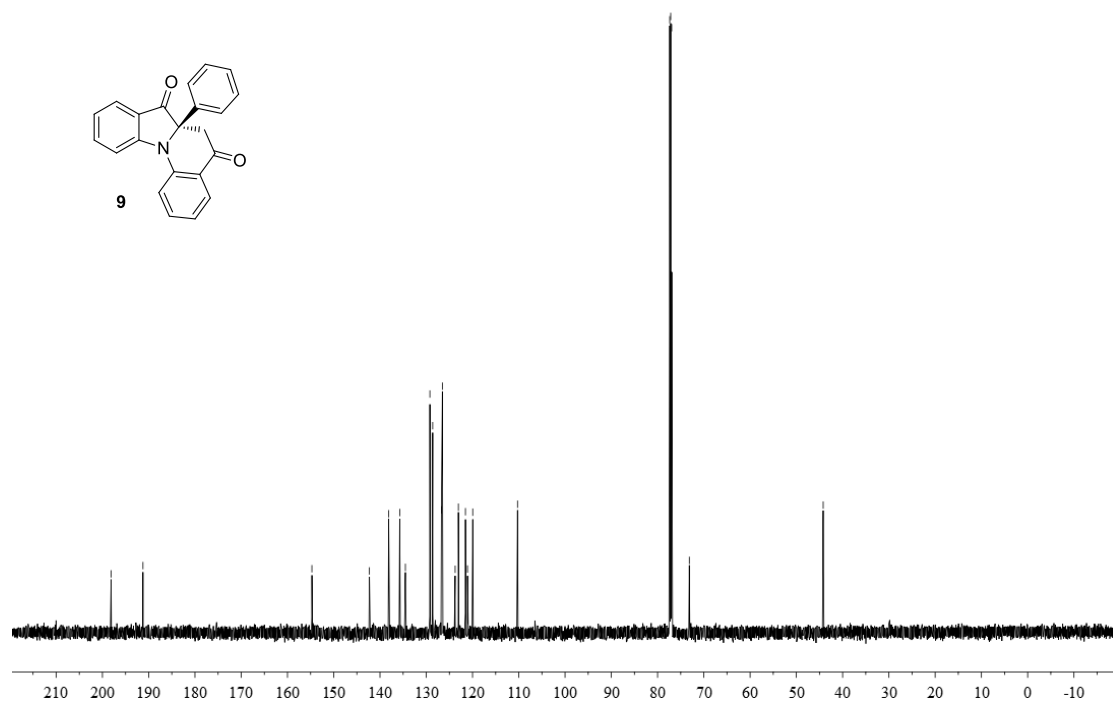

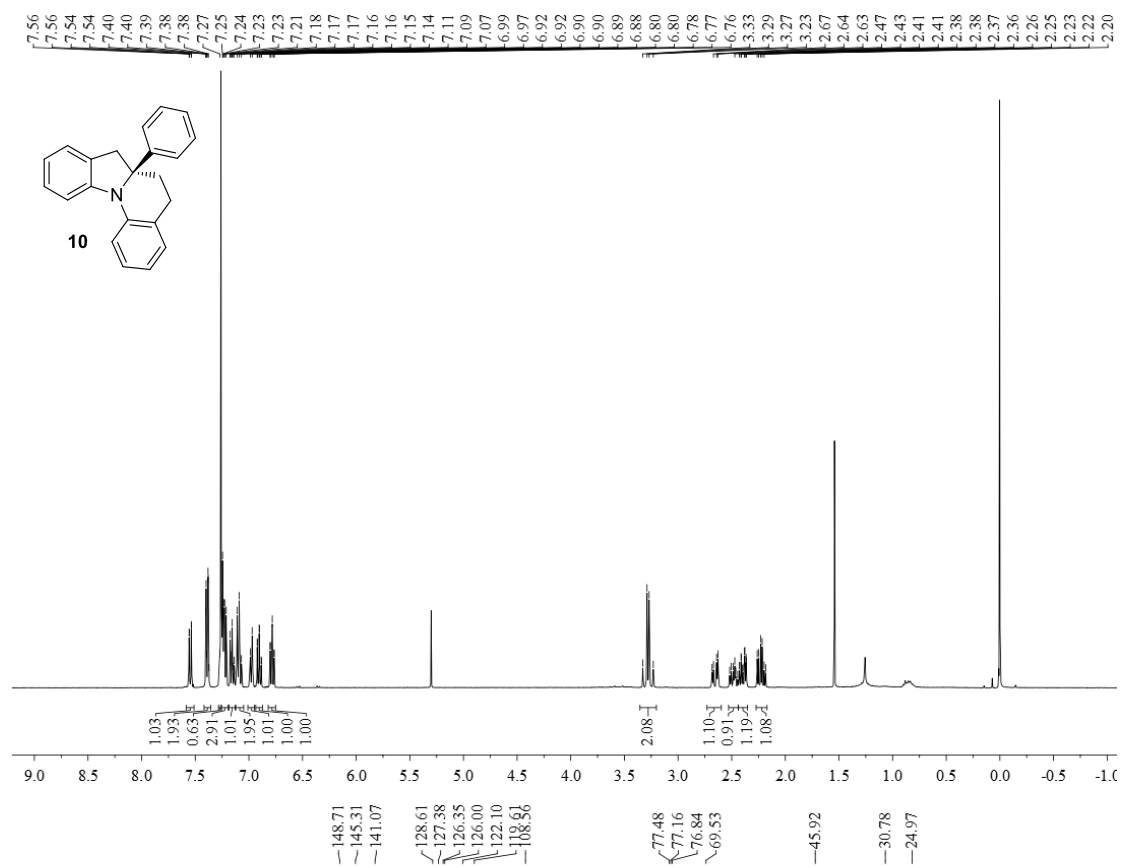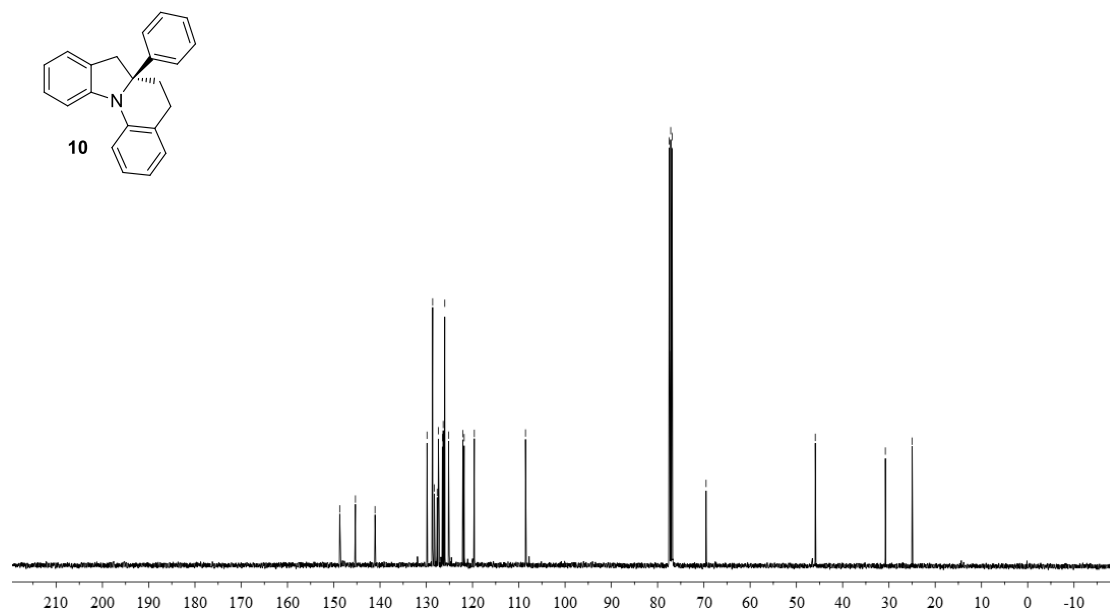

### HPLC charts of the related compounds

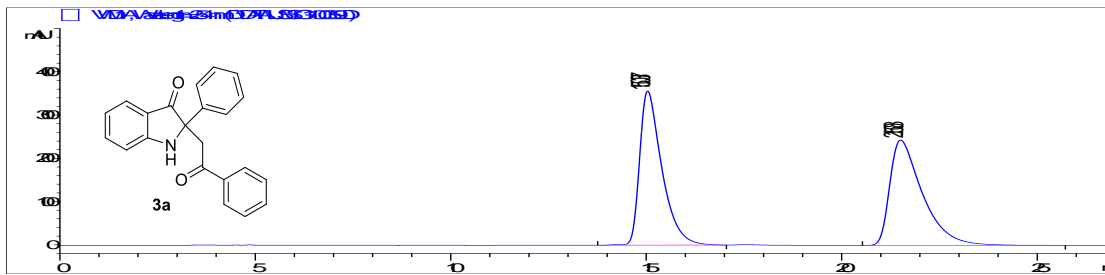

| Peak # | RetTime (min) | Area mAU *s | Height (mAU) | Width (min) | Symmetry Factor | Area (%) |
|--------|---------------|-------------|--------------|-------------|-----------------|----------|
| 1      | 15.037        | 14092.4     | 356.6        | 0.5892      | 0.533           | 49.934   |
| 2      | 21.508        | 14129.7     | 243.5        | 0.8633      | 0.463           | 50.066   |

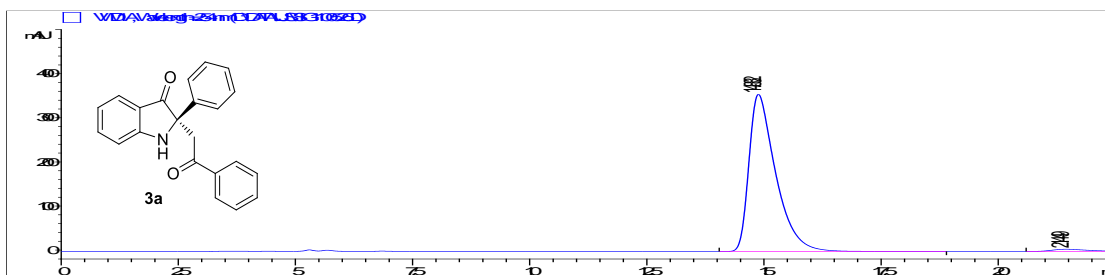

| Peak # | RetTime (min) | Area mAU *s | Height (mAU) | Width (min) | Symmetry Factor | Area (%) |
|--------|---------------|-------------|--------------|-------------|-----------------|----------|
| 1      | 14.882        | 14102       | 356.3        | 0.5899      | 0.512           | 98.023   |
| 2      | 21.449        | 284.4       | 5            | 0.8001      | 0.544           | 1.977    |

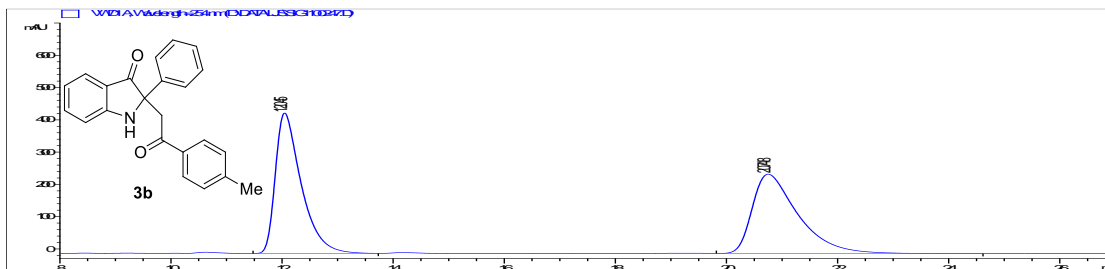

| Peak # | RetTime (min) | Area mAU *s | Height (mAU) | Width (min) | Symmetry Factor | Area (%) |
|--------|---------------|-------------|--------------|-------------|-----------------|----------|
| 1      | 12.045        | 14099.9     | 435.3        | 0.4827      | 0.52            | 49.910   |
| 2      | 20.748        | 14150.5     | 246.3        | 0.8508      | 0.496           | 50.090   |

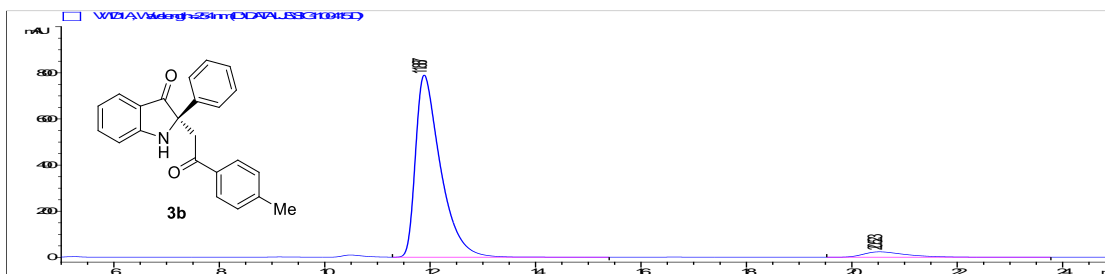

| Peak # | RetTime (min) | Area mAU *s | Height (mAU) | Width (min) | Symmetry Factor | Area (%) |
|--------|---------------|-------------|--------------|-------------|-----------------|----------|
| 1      | 11.887        | 25928.2     | 789.3        | 0.491       | 0.493           | 95.161   |
| 2      | 20.523        | 1318.3      | 23.3         | 0.8367      | 0.551           | 4.839    |

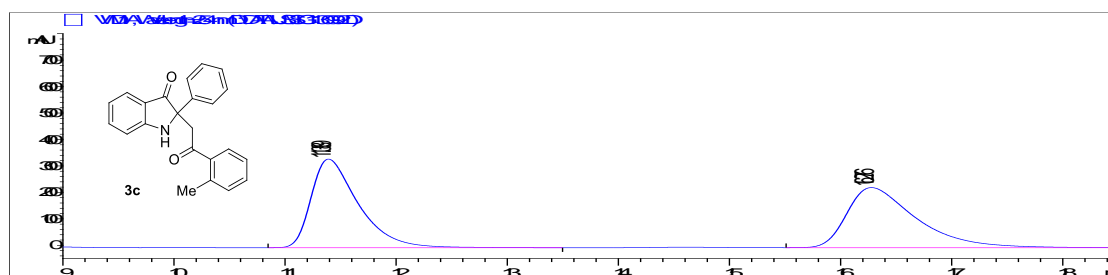

| Peak # | RetTime (min) | Area mAU *s | Height (mAU) | Width (min) | Symmetry Factor | Area (%) |
|--------|---------------|-------------|--------------|-------------|-----------------|----------|
| 1      | 11.389        | 9879.2      | 335.1        | 0.4401      | 0.54            | 50.011   |
| 2      | 16.276        | 9874.7      | 227.3        | 0.6407      | 0.512           | 49.989   |

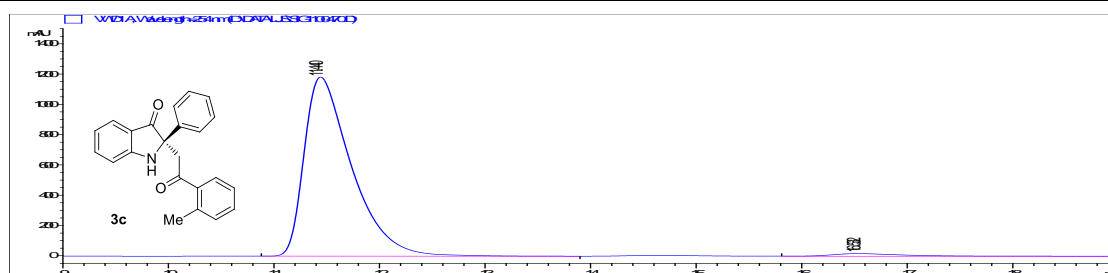

| Peak # | RetTime (min) | Area mAU *s | Height (mAU) | Width (min) | Symmetry Factor | Area (%) |
|--------|---------------|-------------|--------------|-------------|-----------------|----------|
| 1      | 11.44         | 36907.9     | 1182.9       | 0.4659      | 0.492           | 97.942   |
| 2      | 16.532        | 775.4       | 17.1         | 0.6594      | 0.541           | 2.058    |

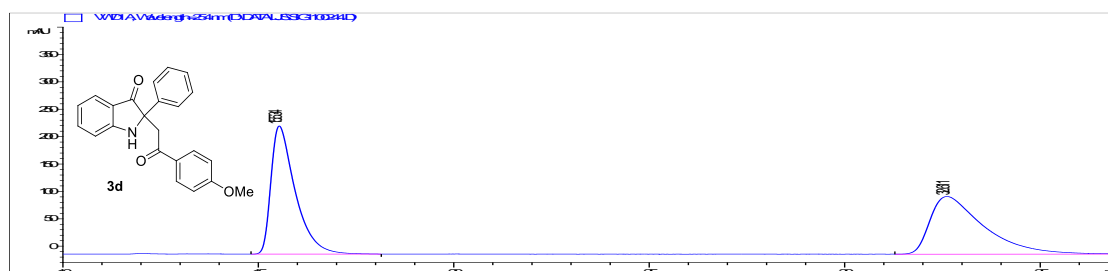

| Peak # | RetTime (min) | Area mAU *s | Height (mAU) | Width (min) | Symmetry Factor | Area (%) |
|--------|---------------|-------------|--------------|-------------|-----------------|----------|
| 1      | 15.534        | 10081       | 234          | 0.6454      | 0.481           | 50.168   |
| 2      | 32.611        | 10013.6     | 105.2        | 1.3468      | 0.428           | 49.832   |

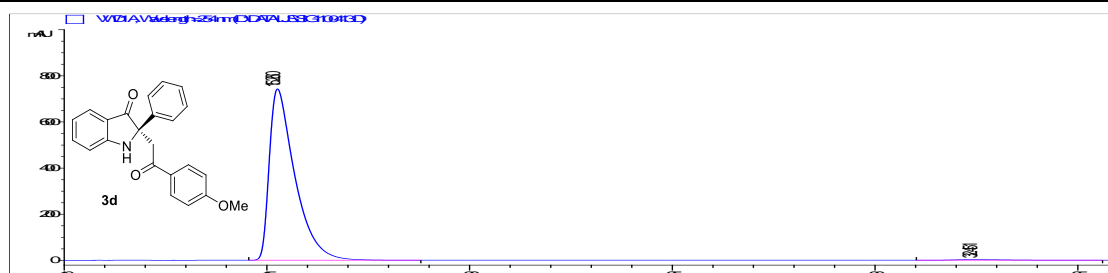

| Peak # | RetTime (min) | Area mAU *s | Height (mAU) | Width (min) | Symmetry Factor | Area (%) |
|--------|---------------|-------------|--------------|-------------|-----------------|----------|
| 1      | 15.26         | 32434       | 742.5        | 0.6436      | 0.435           | 99.254   |
| 2      | 32.451        | 243.8       | 2.7          | 1.0637      | 0.595           | 0.746    |

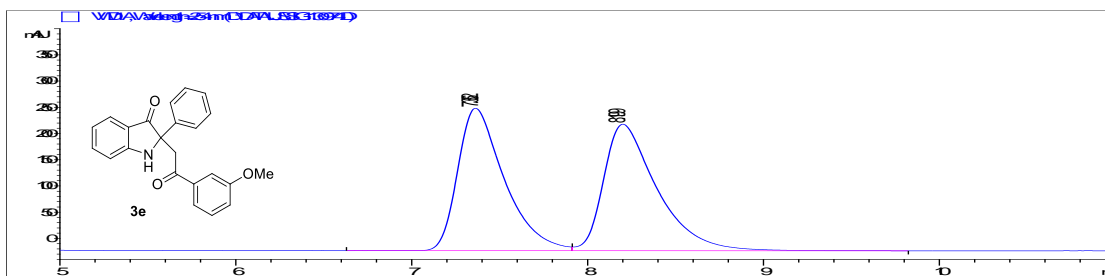

| Peak # | RetTime (min) | Area mAU *s | Height (mAU) | Width (min) | Symmetry Factor | Area (%) |
|--------|---------------|-------------|--------------|-------------|-----------------|----------|
| 1      | 7.362         | 5008.2      | 271.5        | 0.2763      | 0.583           | 49.545   |
| 2      | 8.199         | 5100.2      | 241.2        | 0.3137      | 0.523           | 50.455   |

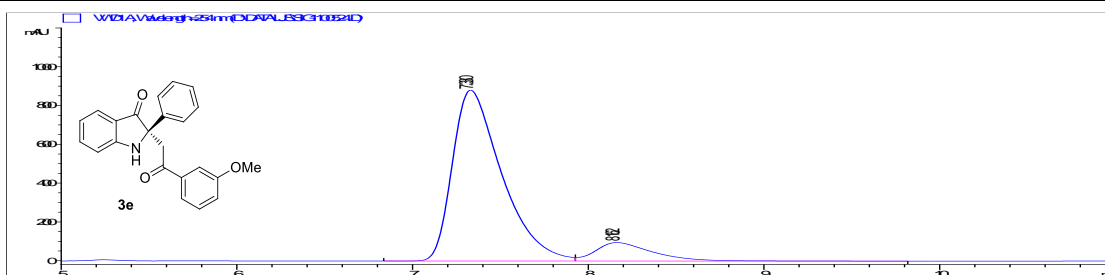

| Peak # | RetTime (min) | Area mAU *s | Height (mAU) | Width (min) | Symmetry Factor | Area (%) |
|--------|---------------|-------------|--------------|-------------|-----------------|----------|
| 1      | 7.33          | 17168.9     | 880.4        | 0.2945      | 0.551           | 89.922   |
| 2      | 8.162         | 2138.9      | 95.1         | 0.3351      | 0.56            | 10.078   |

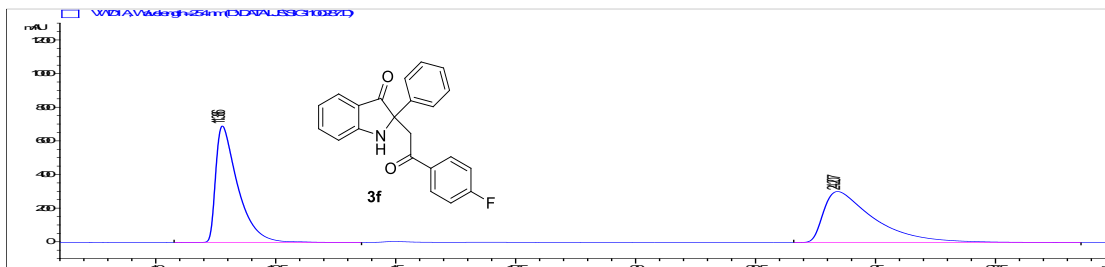

| Peak # | RetTime (min) | Area mAU *s | Height (mAU) | Width (min) | Symmetry Factor | Area (%) |
|--------|---------------|-------------|--------------|-------------|-----------------|----------|
| 1      | 11.386        | 22135       | 692.3        | 0.472       | 0.395           | 50.041   |
| 2      | 24.207        | 22098.7     | 302.9        | 1.0347      | 0.353           | 49.959   |

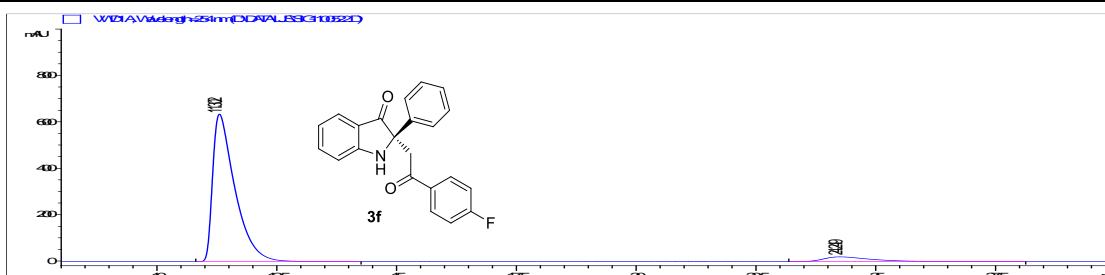

| Peak # | RetTime (min) | Area mAU *s | Height (mAU) | Width (min) | Symmetry Factor | Area (%) |
|--------|---------------|-------------|--------------|-------------|-----------------|----------|
| 1      | 11.302        | 20472.7     | 635.8        | 0.4776      | 0.402           | 94.527   |
| 2      | 24.249        | 1416.9      | 20.5         | 0.988       | 0.482           | 5.473    |

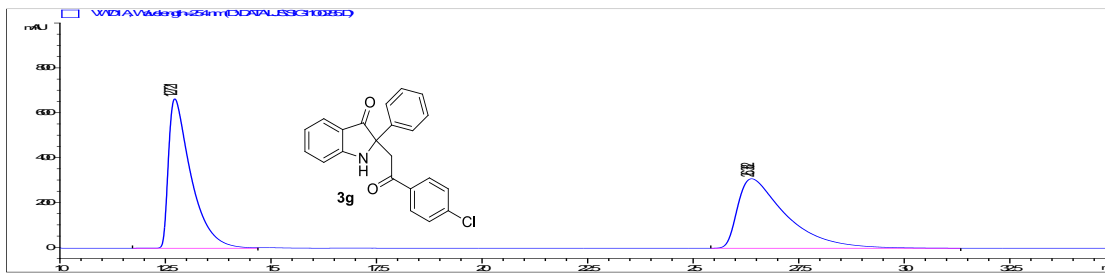

| Peak # | RetTime (min) | Area mAU *s | Height (mAU) | Width (min) | Symmetry Factor | Area (%) |
|--------|---------------|-------------|--------------|-------------|-----------------|----------|
| 1      | 12.721        | 24701.7     | 666          | 0.5463      | 0.356           | 50.092   |
| 2      | 26.382        | 24611.3     | 309.6        | 1.1458      | 0.371           | 49.908   |

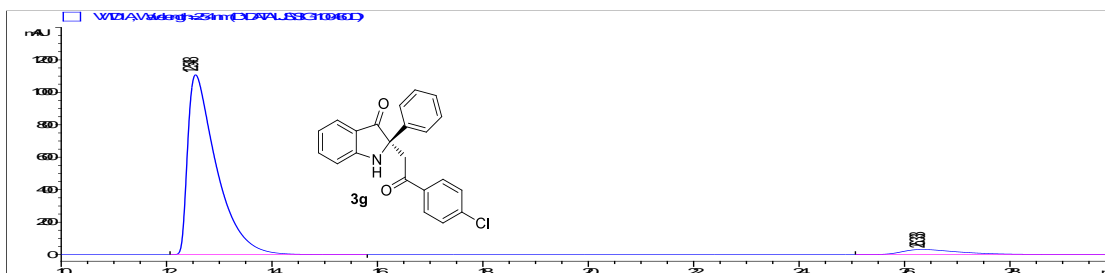

| Peak # | RetTime (min) | Area mAU *s | Height (mAU) | Width (min) | Symmetry Factor | Area (%) |
|--------|---------------|-------------|--------------|-------------|-----------------|----------|
| 1      | 12.548        | 41799       | 1107.7       | 0.5567      | 0.344           | 94.644   |
| 2      | 26.333        | 2365.4      | 31.4         | 1.0779      | 0.491           | 5.356    |

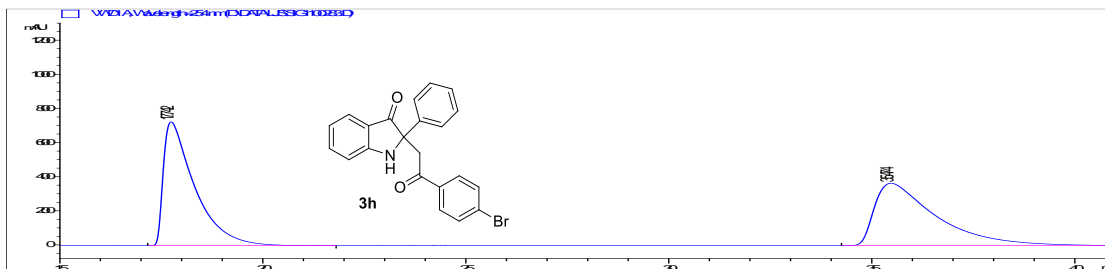

| Peak # | RetTime (min) | Area mAU *s | Height (mAU) | Width (min) | Symmetry Factor | Area (%) |
|--------|---------------|-------------|--------------|-------------|-----------------|----------|
| 1      | 17.742        | 38870.4     | 725.3        | 0.7766      | 0.296           | 50.218   |
| 2      | 35.474        | 38533.2     | 365.7        | 1.4682      | 0.338           | 49.782   |

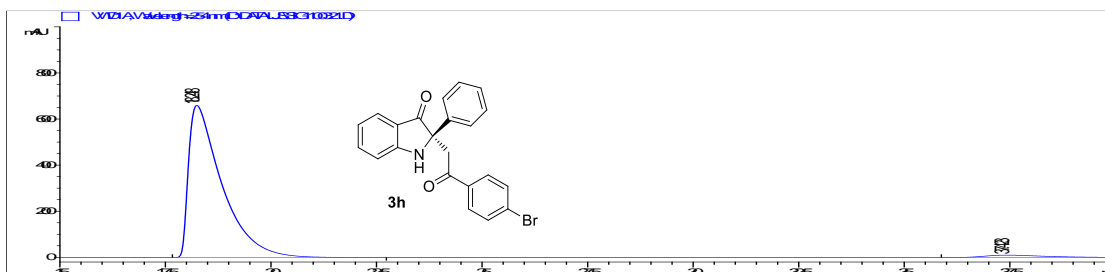

| Peak # | RetTime (min) | Area mAU *s | Height (mAU) | Width (min) | Symmetry Factor | Area (%) |
|--------|---------------|-------------|--------------|-------------|-----------------|----------|
| 1      | 18.248        | 36122.7     | 659.6        | 0.802       | 0.303           | 97.249   |
| 2      | 37.423        | 1021.7      | 10.2         | 1.3954      | 0.513           | 2.751    |



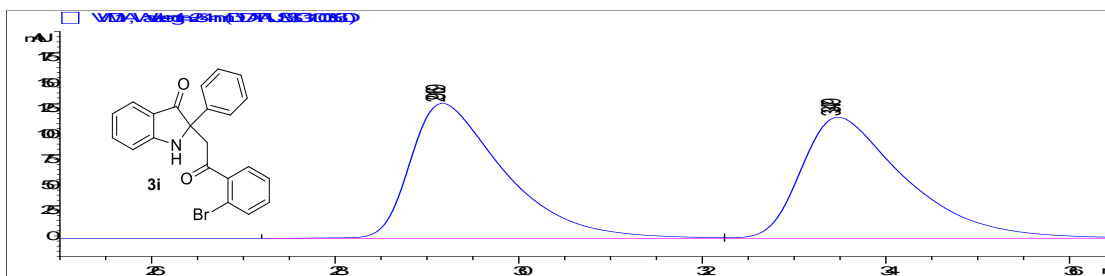

| Peak # | RetTime (min) | Area mAU *s | Height (mAU) | Width (min) | Symmetry Factor | Area (%) |
|--------|---------------|-------------|--------------|-------------|-----------------|----------|
| 1      | 29.169        | 9414        | 132.1        | 1.0675      | 0.487           | 50.115   |
| 2      | 33.479        | 9370.8      | 118.4        | 1.1738      | 0.512           | 49.885   |

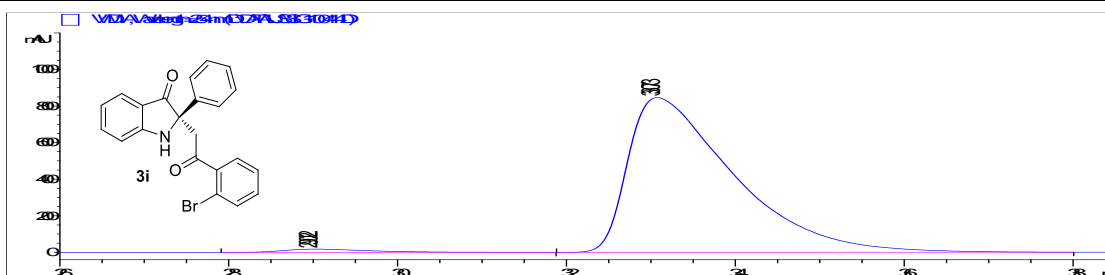

| Peak # | RetTime (min) | Area mAU *s | Height (mAU) | Width (min) | Symmetry Factor | Area (%) |
|--------|---------------|-------------|--------------|-------------|-----------------|----------|
| 1      | 29.022        | 1237.9      | 17.6         | 1.0062      | 0.53            | 1.658    |
| 2      | 33.073        | 73416       | 846.1        | 1.251       | 0.358           | 98.342   |

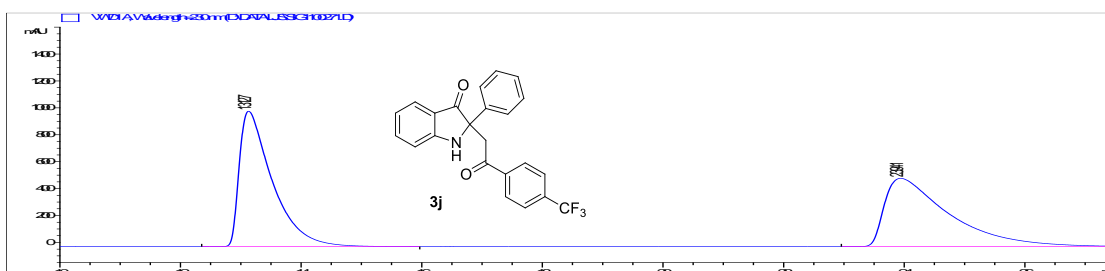

| Peak # | RetTime (min) | Area mAU *s | Height (mAU) | Width (min) | Symmetry Factor | Area (%) |
|--------|---------------|-------------|--------------|-------------|-----------------|----------|
| 1      | 13.127        | 38292.5     | 1006.2       | 0.5547      | 0.359           | 50.238   |
| 2      | 23.941        | 37929.3     | 507.4        | 1.0526      | 0.308           | 49.762   |

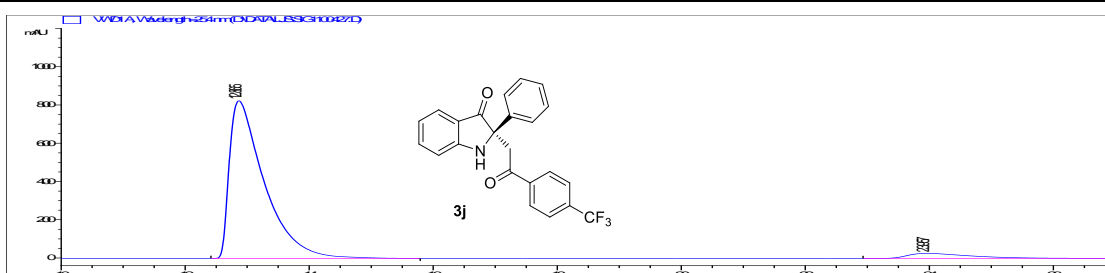

| Peak # | RetTime (min) | Area mAU *s | Height (mAU) | Width (min) | Symmetry Factor | Area (%) |
|--------|---------------|-------------|--------------|-------------|-----------------|----------|
| 1      | 12.865        | 32208.9     | 824.2        | 0.5724      | 0.342           | 94.918   |
| 2      | 23.957        | 1868.2      | 26.5         | 1.0111      | 0.401           | 5.082    |

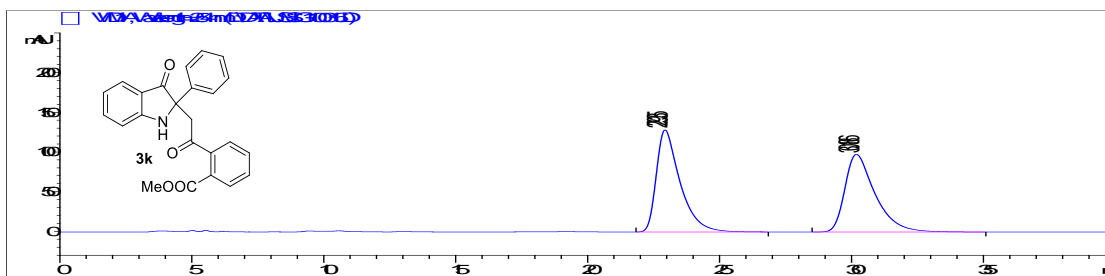

| Peak # | RetTime (min) | Area mAU *s | Height (mAU) | Width (min) | Symmetry Factor | Area (%) |
|--------|---------------|-------------|--------------|-------------|-----------------|----------|
| 1      | 22.935        | 8037.2      | 128.6        | 0.9157      | 0.54            | 50.848   |
| 2      | 30.186        | 7769        | 97.7         | 1.1574      | 0.578           | 49.152   |

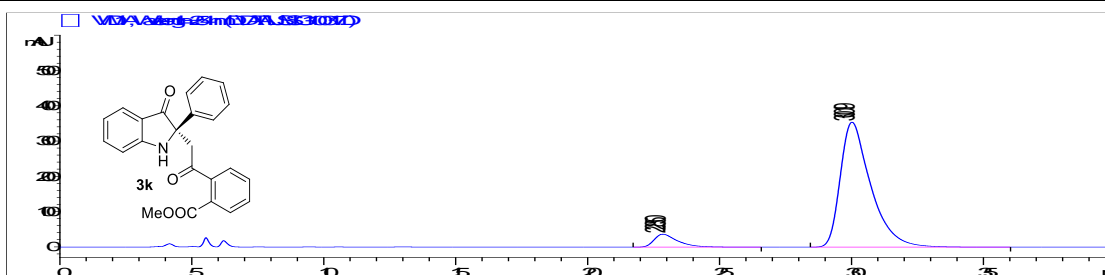

| Peak # | RetTime (min) | Area mAU *s | Height (mAU) | Width (min) | Symmetry Factor | Area (%) |
|--------|---------------|-------------|--------------|-------------|-----------------|----------|
| 1      | 22.85         | 2271.4      | 36.7         | 0.9193      | 0.547           | 7.414    |
| 2      | 30.019        | 28364.1     | 354.1        | 1.1704      | 0.583           | 92.586   |

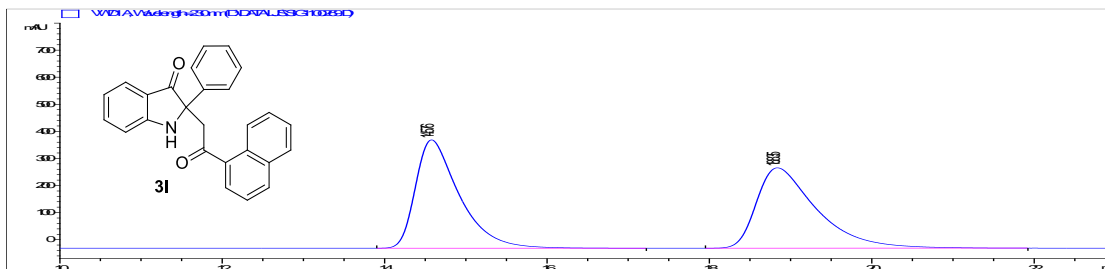

| Peak # | RetTime (min) | Area mAU *s | Height (mAU) | Width (min) | Symmetry Factor | Area (%) |
|--------|---------------|-------------|--------------|-------------|-----------------|----------|
| 1      | 14.576        | 15020.2     | 400.1        | 0.5515      | 0.54            | 49.634   |
| 2      | 18.835        | 15241.8     | 296.9        | 0.762       | 0.494           | 50.366   |

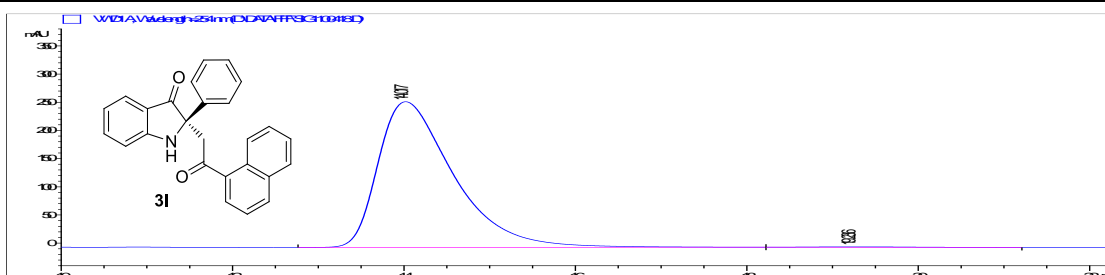

| Peak # | RetTime (min) | Area mAU *s | Height (mAU) | Width (min) | Symmetry Factor | Area (%) |
|--------|---------------|-------------|--------------|-------------|-----------------|----------|
| 1      | 14.017        | 15783.5     | 258.4        | 0.9207      | 0.535           | 99.638   |
| 2      | 19.236        | 57.3        | 7.6E-1       | 0.8942      | 0.627           | 0.362    |

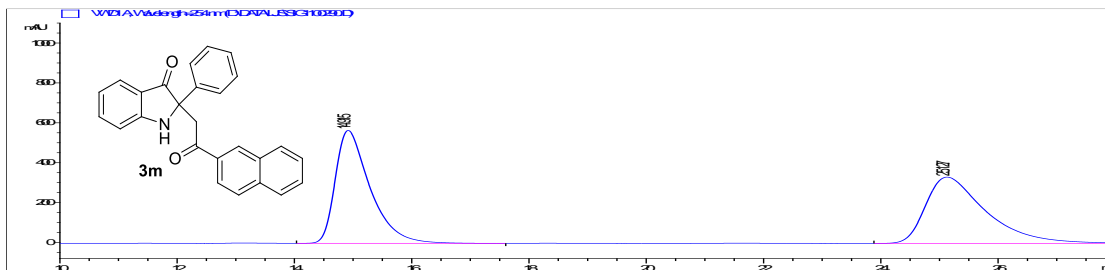

| Peak # | RetTime (min) | Area mAU *s | Height (mAU) | Width (min) | Symmetry Factor | Area (%) |
|--------|---------------|-------------|--------------|-------------|-----------------|----------|
| 1      | 14.915        | 23346.5     | 565.9        | 0.6124      | 0.547           | 49.610   |
| 2      | 25.127        | 23713.7     | 332          | 1.0664      | 0.511           | 50.390   |

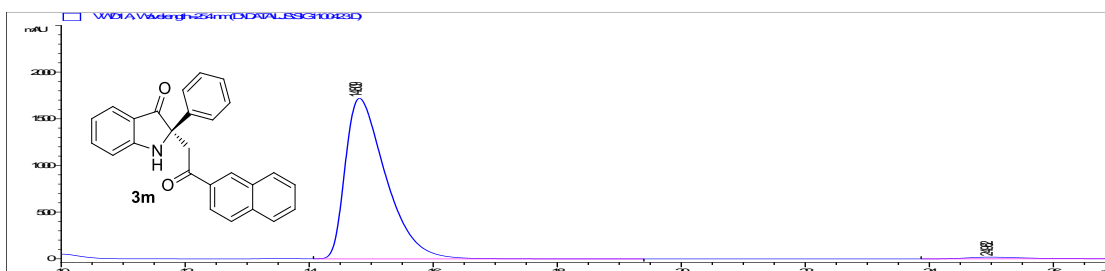

| Peak # | RetTime (min) | Area mAU *s | Height (mAU) | Width (min) | Symmetry Factor | Area (%) |
|--------|---------------|-------------|--------------|-------------|-----------------|----------|
| 1      | 14.809        | 78192       | 1720.2       | 0.6876      | 0.502           | 98.479   |
| 2      | 24.982        | 1207.5      | 18.7         | 0.9543      | 0.639           | 1.521    |

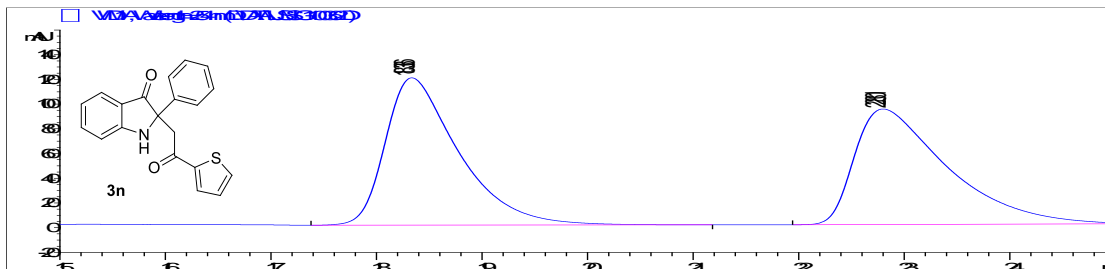

| Peak # | RetTime (min) | Area mAU *s | Height (mAU) | Width (min) | Symmetry Factor | Area (%) |
|--------|---------------|-------------|--------------|-------------|-----------------|----------|
| 1      | 18.336        | 5767.4      | 119.2        | 0.7159      | 0.531           | 50.275   |
| 2      | 22.801        | 5704.2      | 93.5         | 0.8806      | 0.416           | 49.725   |

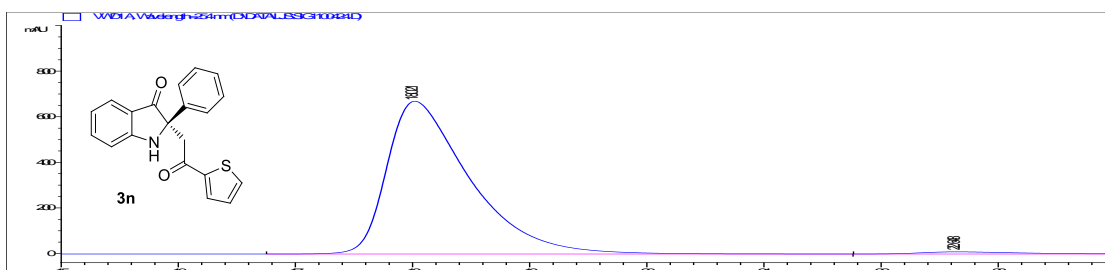

| Peak # | RetTime (min) | Area mAU *s | Height (mAU) | Width (min) | Symmetry Factor | Area (%) |
|--------|---------------|-------------|--------------|-------------|-----------------|----------|
| 1      | 18.021        | 32867.7     | 669.9        | 0.7325      | 0.478           | 98.359   |
| 2      | 22.648        | 548.3       | 9.4          | 0.8524      | 0.511           | 1.641    |

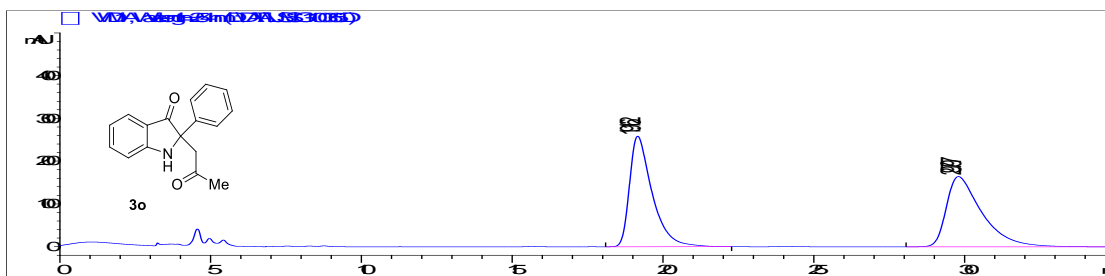

| Peak # | RetTime (min) | Area mAU *s | Height (mAU) | Width (min) | Symmetry Factor | Area (%) |
|--------|---------------|-------------|--------------|-------------|-----------------|----------|
| 1      | 19.162        | 2102.5      | 90.8         | 0.343       | 0.586           | 50.533   |
| 2      | 29.797        | 2058.2      | 78.1         | 0.3976      | 0.552           | 49.467   |

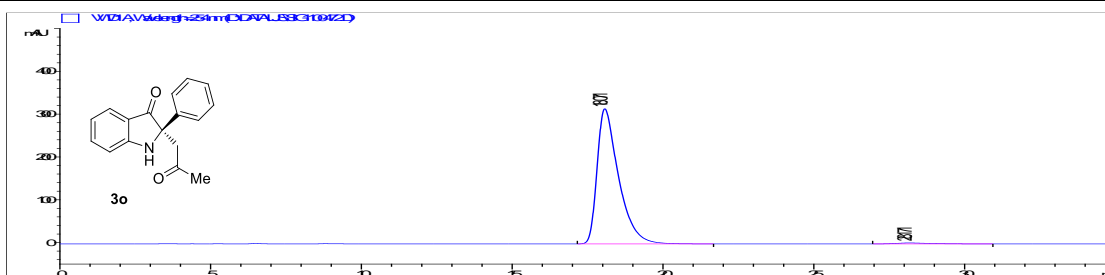

| Peak # | RetTime (min) | Area mAU *s | Height (mAU) | Width (min) | Symmetry Factor | Area (%) |
|--------|---------------|-------------|--------------|-------------|-----------------|----------|
| 1      | 18.071        | 15598.2     | 315.7        | 0.7278      | 0.524           | 98.894   |
| 2      | 28.171        | 174.5       | 2.3          | 0.9251      | 0.597           | 1.106    |

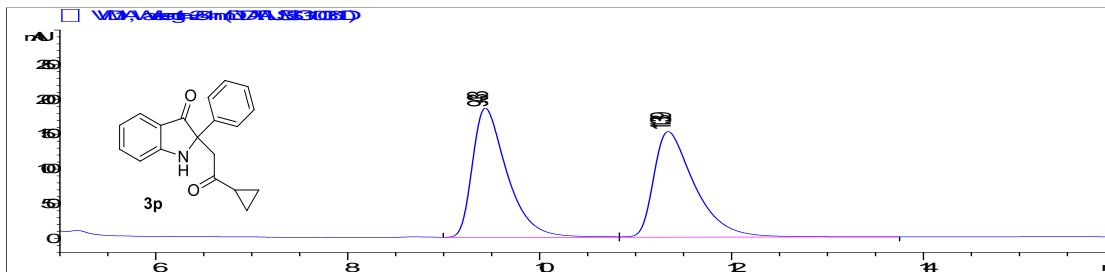

| Peak # | RetTime (min) | Area mAU *s | Height (mAU) | Width (min) | Symmetry Factor | Area (%) |
|--------|---------------|-------------|--------------|-------------|-----------------|----------|
| 1      | 9.433         | 4666.8      | 185.8        | 0.3774      | 0.551           | 50.947   |
| 2      | 11.339        | 4493.3      | 151.9        | 0.4442      | 0.509           | 49.053   |

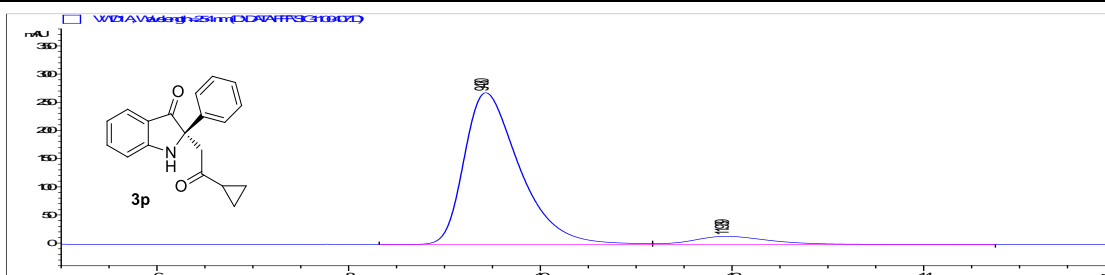

| Peak # | RetTime (min) | Area mAU *s | Height (mAU) | Width (min) | Symmetry Factor | Area (%) |
|--------|---------------|-------------|--------------|-------------|-----------------|----------|
| 1      | 9.43          | 10872.5     | 269.4        | 0.6135      | 0.594           | 92.997   |
| 2      | 11.939        | 818.8       | 14.7         | 0.8266      | 0.694           | 7.003    |

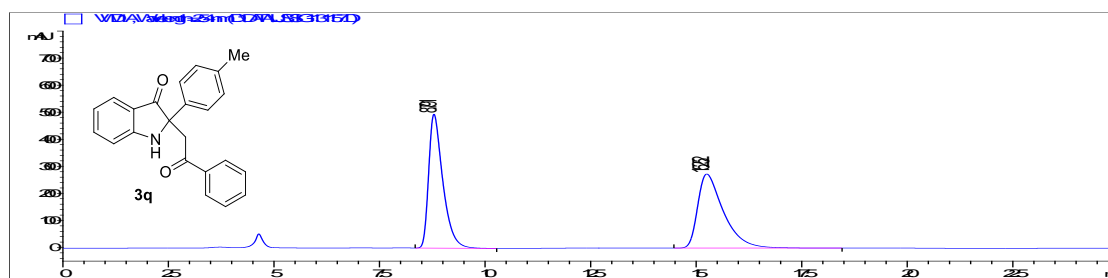

| Peak # | RetTime (min) | Area mAU *s | Height (mAU) | Width (min) | Symmetry Factor | Area (%) |
|--------|---------------|-------------|--------------|-------------|-----------------|----------|
| 1      | 8.791         | 11530.9     | 494.9        | 0.3475      | 0.56            | 49.886   |
| 2      | 15.252        | 11583.5     | 273.8        | 0.6275      | 0.504           | 50.114   |

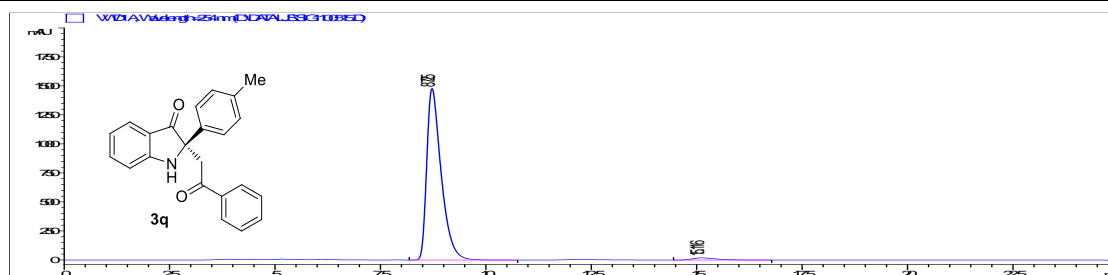

| Peak # | RetTime (min) | Area mAU *s | Height (mAU) | Width (min) | Symmetry Factor | Area (%) |
|--------|---------------|-------------|--------------|-------------|-----------------|----------|
| 1      | 8.725         | 35143.6     | 1477.8       | 0.3561      | 0.538           | 97.901   |
| 2      | 15.116        | 753.3       | 18.7         | 0.6051      | 0.57            | 2.099    |

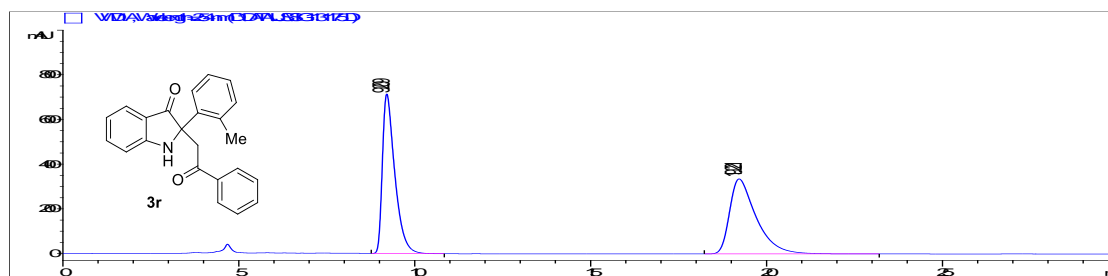

| Peak # | RetTime (min) | Area mAU *s | Height (mAU) | Width (min) | Symmetry Factor | Area (%) |
|--------|---------------|-------------|--------------|-------------|-----------------|----------|
| 1      | 9.209         | 17488.7     | 713.4        | 0.3675      | 0.507           | 49.816   |
| 2      | 19.221        | 17617.8     | 335.8        | 0.7752      | 0.516           | 50.184   |

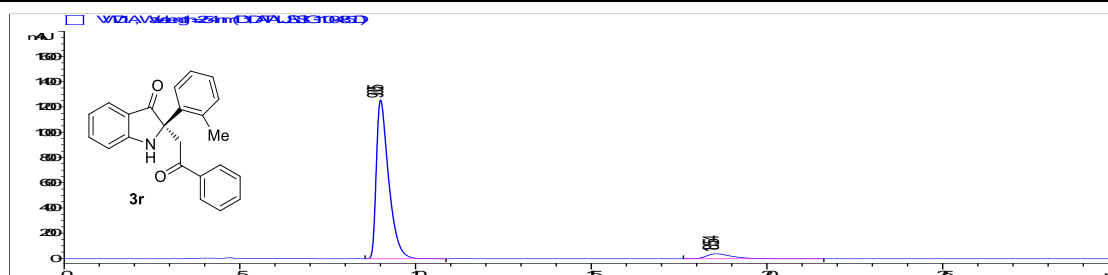

| Peak # | RetTime (min) | Area mAU *s | Height (mAU) | Width (min) | Symmetry Factor | Area (%) |
|--------|---------------|-------------|--------------|-------------|-----------------|----------|
| 1      | 9.005         | 30708.5     | 1258.9       | 0.3632      | 0.485           | 95.837   |
| 2      | 18.554        | 2017        | 39.9         | 0.7407      | 0.553           | 4.163    |

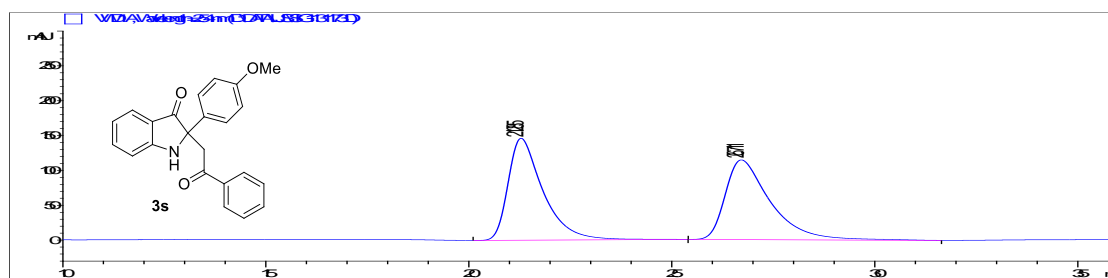

| Peak # | RetTime (min) | Area mAU *s | Height (mAU) | Width (min) | Symmetry Factor | Area (%) |
|--------|---------------|-------------|--------------|-------------|-----------------|----------|
| 1      | 21.285        | 8756        | 146.2        | 0.885       | 0.546           | 49.798   |
| 2      | 26.711        | 8827.2      | 114.3        | 1.1397      | 0.51            | 50.202   |

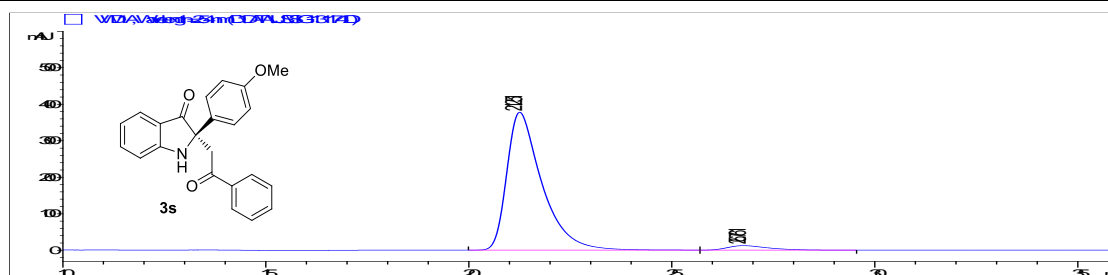

| Peak # | RetTime (min) | Area mAU *s | Height (mAU) | Width (min) | Symmetry Factor | Area (%) |
|--------|---------------|-------------|--------------|-------------|-----------------|----------|
| 1      | 21.251        | 22633.9     | 377.5        | 0.8859      | 0.537           | 96.411   |
| 2      | 26.761        | 842.5       | 12.2         | 1.0187      | 0.602           | 3.589    |

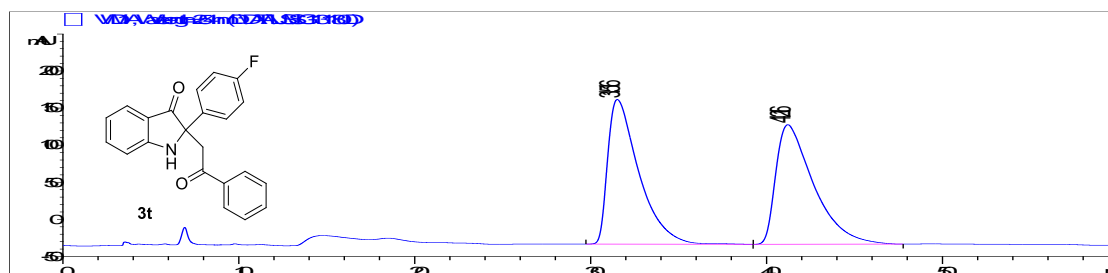

| Peak # | RetTime (min) | Area mAU *s | Height (mAU) | Width (min) | Symmetry Factor | Area (%) |
|--------|---------------|-------------|--------------|-------------|-----------------|----------|
| 1      | 31.516        | 23947.5     | 194.9        | 1.806       | 0.411           | 49.870   |
| 2      | 41.216        | 24072.5     | 161.2        | 2.1874      | 0.436           | 50.130   |

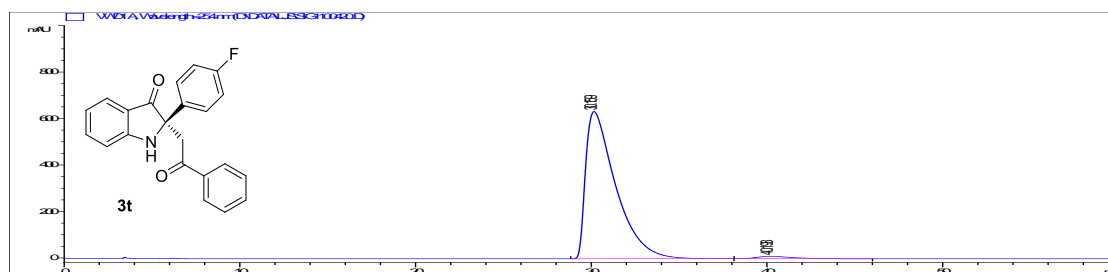

| Peak # | RetTime (min) | Area mAU *s | Height (mAU) | Width (min) | Symmetry Factor | Area (%) |
|--------|---------------|-------------|--------------|-------------|-----------------|----------|
| 1      | 30.159        | 75283.3     | 633.4        | 1.7448      | 0.358           | 98.115   |
| 2      | 40.193        | 1446.7      | 10.3         | 1.7235      | 0.574           | 1.885    |

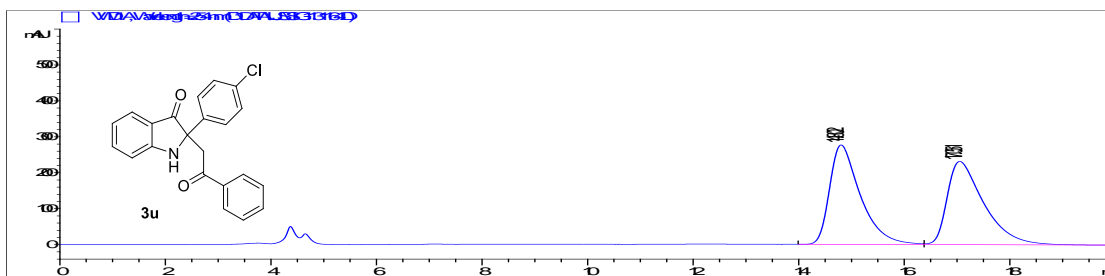

| Peak # | RetTime (min) | Area mAU *s | Height (mAU) | Width (min) | Symmetry Factor | Area (%) |
|--------|---------------|-------------|--------------|-------------|-----------------|----------|
| 1      | 14.802        | 11226.7     | 276.6        | 0.6016      | 0.552           | 50.105   |
| 2      | 17.051        | 11179.9     | 231.7        | 0.7173      | 0.485           | 49.895   |

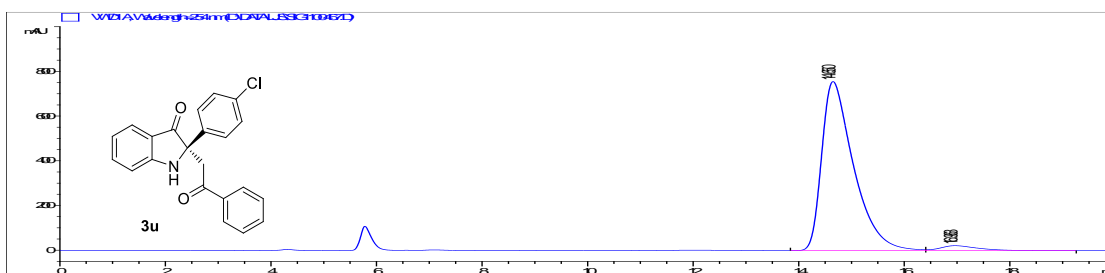

| Peak # | RetTime (min) | Area mAU *s | Height (mAU) | Width (min) | Symmetry Factor | Area (%) |
|--------|---------------|-------------|--------------|-------------|-----------------|----------|
| 1      | 14.65         | 31677.8     | 756.4        | 0.6226      | 0.513           | 96.685   |
| 2      | 16.963        | 1086        | 22           | 0.7214      | 0.603           | 3.315    |

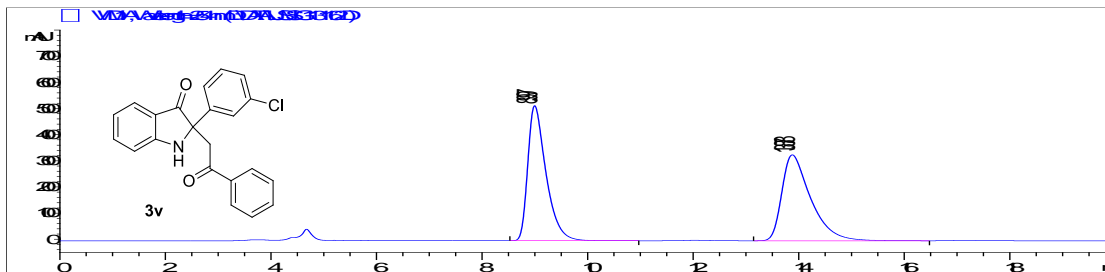

| Peak # | RetTime (min) | Area mAU *s | Height (mAU) | Width (min) | Symmetry Factor | Area (%) |
|--------|---------------|-------------|--------------|-------------|-----------------|----------|
| 1      | 8.997         | 12370.6     | 516.1        | 0.3582      | 0.567           | 49.866   |
| 2      | 13.878        | 12437       | 328.3        | 0.5613      | 0.529           | 50.134   |

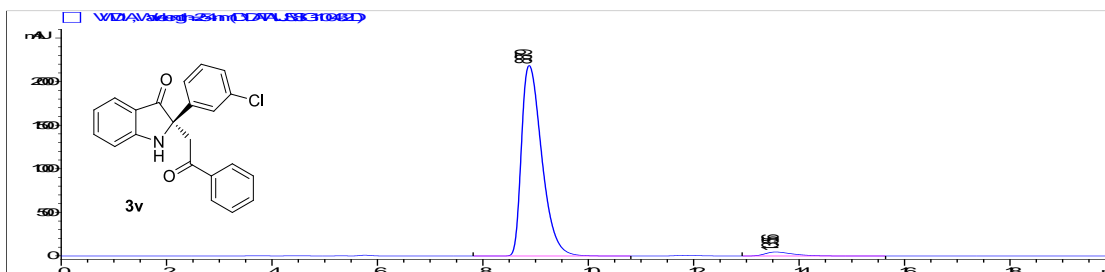

| Peak # | RetTime (min) | Area mAU *s | Height (mAU) | Width (min) | Symmetry Factor | Area (%) |
|--------|---------------|-------------|--------------|-------------|-----------------|----------|
| 1      | 8.879         | 58437.9     | 2185.9       | 0.4138      | 0.566           | 97.151   |
| 2      | 13.556        | 1713.6      | 46.1         | 0.5502      | 0.554           | 2.849    |

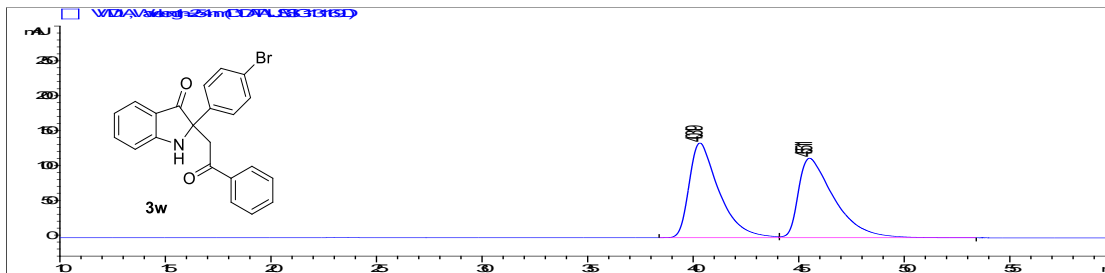

| Peak # | RetTime (min) | Area mAU *s | Height (mAU) | Width (min) | Symmetry Factor | Area (%) |
|--------|---------------|-------------|--------------|-------------|-----------------|----------|
| 1      | 40.319        | 13364.7     | 135.9        | 1.471       | 0.52            | 49.896   |
| 2      | 45.511        | 13420.2     | 114.1        | 1.7649      | 0.415           | 50.104   |

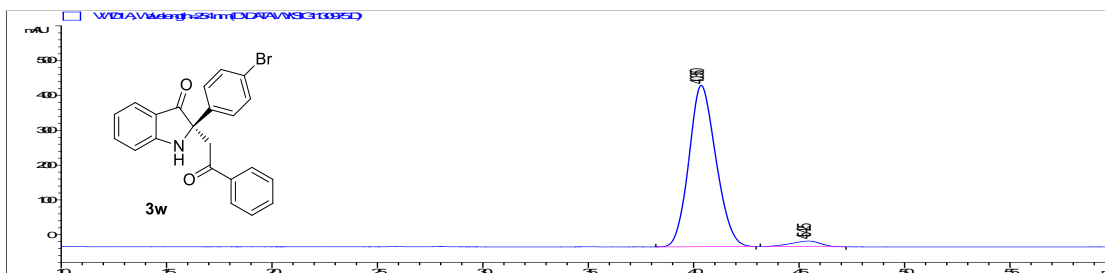

| Peak # | RetTime (min) | Area mAU *s | Height (mAU) | Width (min) | Symmetry Factor | Area (%) |
|--------|---------------|-------------|--------------|-------------|-----------------|----------|
| 1      | 40.35         | 41275.4     | 463.7        | 1.353       | 0.804           | 96.257   |
| 2      | 45.425        | 1604.9      | 16.4         | 1.1604      | 1.367           | 3.743    |

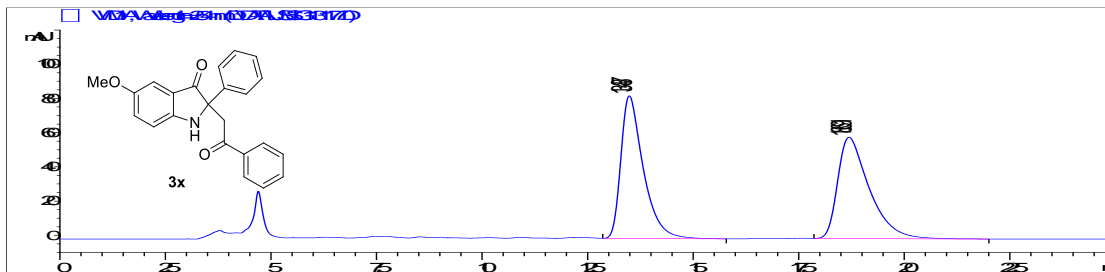

| Peak # | RetTime (min) | Area mAU *s | Height (mAU) | Width (min) | Symmetry Factor | Area (%) |
|--------|---------------|-------------|--------------|-------------|-----------------|----------|
| 1      | 13.487        | 3077.1      | 83.5         | 0.5496      | 0.559           | 50.095   |
| 2      | 18.691        | 3065.5      | 59.2         | 0.7643      | 0.519           | 49.905   |

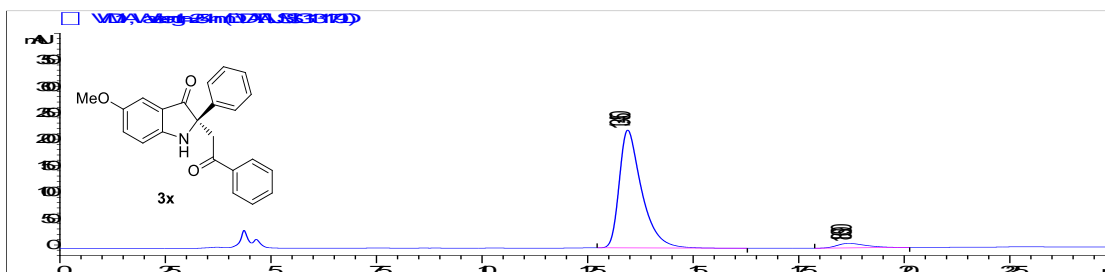

| Peak # | RetTime (min) | Area mAU *s | Height (mAU) | Width (min) | Symmetry Factor | Area (%) |
|--------|---------------|-------------|--------------|-------------|-----------------|----------|
| 1      | 13.45         | 8197.6      | 222.8        | 0.5487      | 0.567           | 95.208   |
| 2      | 18.69         | 412.6       | 8.6          | 0.6988      | 0.63            | 4.792    |



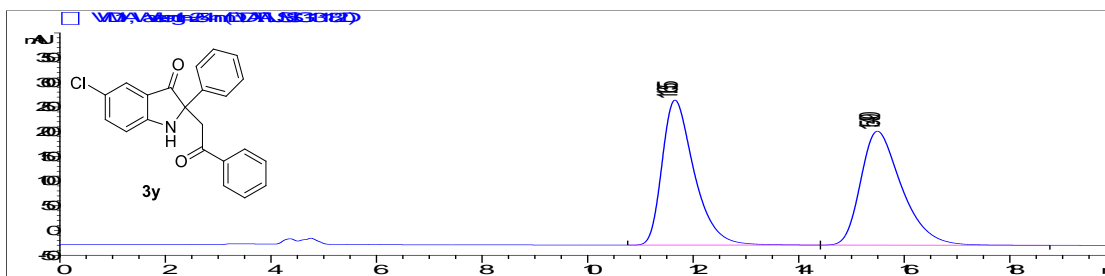

| Peak # | RetTime (min) | Area mAU *s | Height (mAU) | Width (min) | Symmetry Factor | Area (%) |
|--------|---------------|-------------|--------------|-------------|-----------------|----------|
| 1      | 11.655        | 12396.7     | 293.5        | 0.6442      | 0.626           | 49.940   |
| 2      | 15.49         | 12426.5     | 230.6        | 0.8151      | 0.647           | 50.060   |

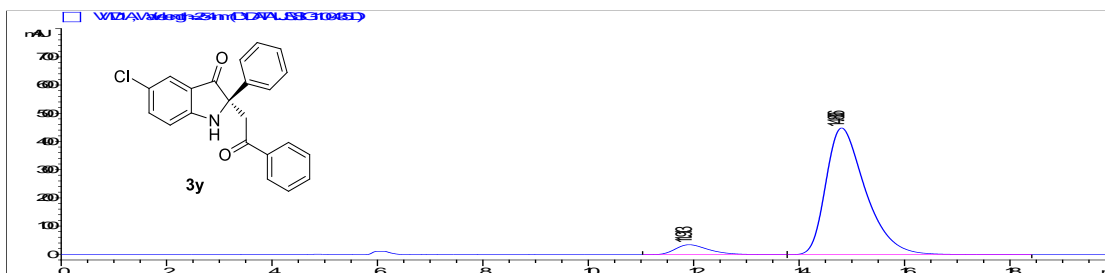

| Peak # | RetTime (min) | Area mAU *s | Height (mAU) | Width (min) | Symmetry Factor | Area (%) |
|--------|---------------|-------------|--------------|-------------|-----------------|----------|
| 1      | 11.913        | 1587.5      | 35.3         | 0.6814      | 0.643           | 6.355    |
| 2      | 14.806        | 23394.9     | 449.2        | 0.794       | 0.618           | 93.645   |

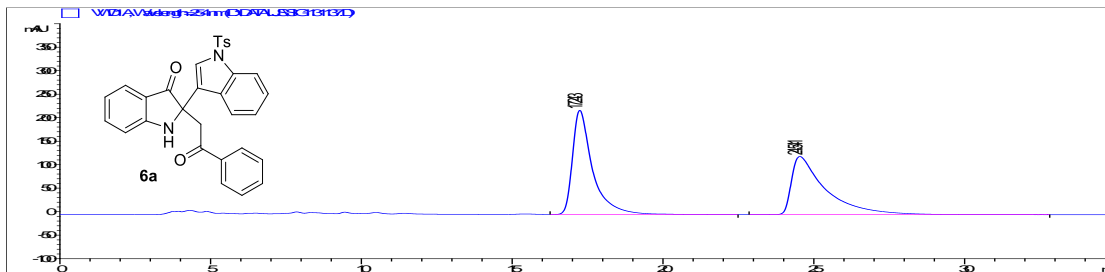

| Peak # | RetTime (min) | Area mAU *s | Height (mAU) | Width (min) | Symmetry Factor | Area (%) |
|--------|---------------|-------------|--------------|-------------|-----------------|----------|
| 1      | 17.243        | 10242.3     | 221.6        | 0.679       | 0.522           | 51.321   |
| 2      | 24.541        | 9715        | 123.6        | 1.1033      | 0.294           | 48.679   |

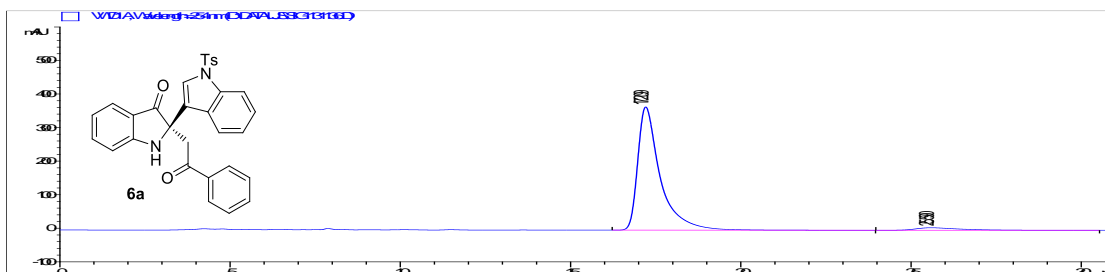

| Peak # | RetTime (min) | Area mAU *s | Height (mAU) | Width (min) | Symmetry Factor | Area (%) |
|--------|---------------|-------------|--------------|-------------|-----------------|----------|
| 1      | 17.209        | 16848       | 367.4        | 0.6806      | 0.502           | 96.226   |
| 2      | 25.59         | 660.8       | 7.3          | 1.3203      | 0.478           | 3.774    |

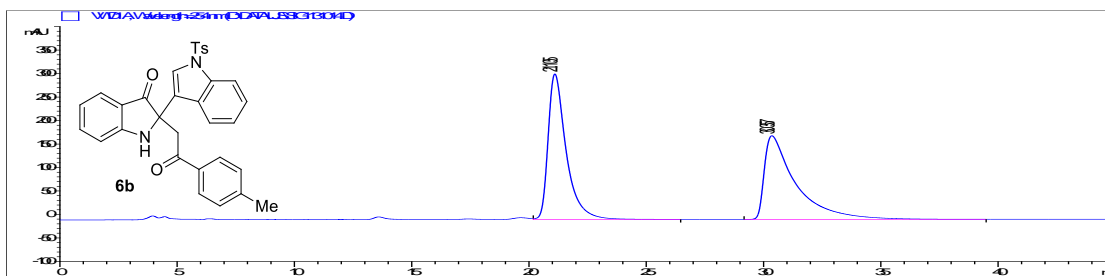

| Peak # | RetTime (min) | Area mAU *s | Height (mAU) | Width (min) | Symmetry Factor | Area (%) |
|--------|---------------|-------------|--------------|-------------|-----------------|----------|
| 1      | 21.105        | 16612.9     | 309.8        | 0.8003      | 0.555           | 50.044   |
| 2      | 30.357        | 16583.9     | 178.1        | 1.3191      | 0.284           | 49.956   |

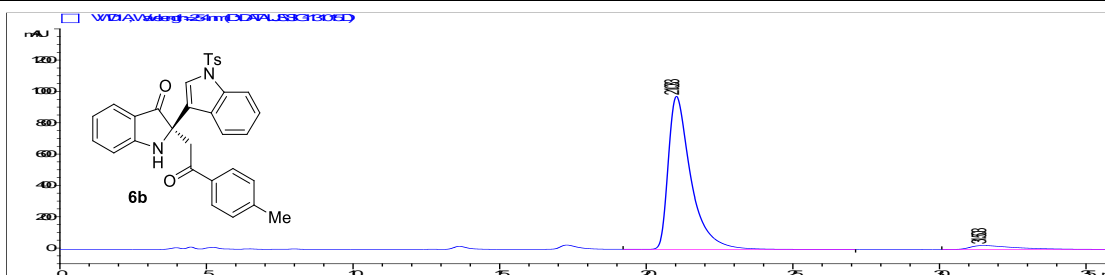

| Peak # | RetTime (min) | Area mAU *s | Height (mAU) | Width (min) | Symmetry Factor | Area (%) |
|--------|---------------|-------------|--------------|-------------|-----------------|----------|
| 1      | 21.033        | 52507.6     | 977.7        | 0.8013      | 0.525           | 95.045   |
| 2      | 31.503        | 2737.1      | 25.3         | 1.5261      | 0.361           | 4.955    |

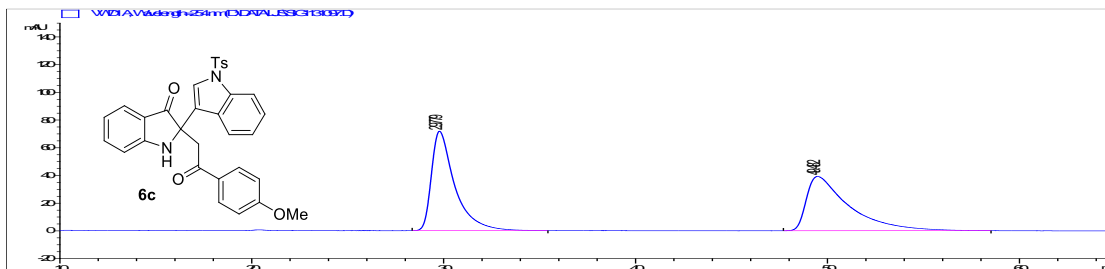

| Peak # | RetTime (min) | Area mAU *s | Height (mAU) | Width (min) | Symmetry Factor | Area (%) |
|--------|---------------|-------------|--------------|-------------|-----------------|----------|
| 1      | 29.779        | 6055.7      | 71.8         | 1.243       | 0.486           | 50.043   |
| 2      | 49.482        | 6045.3      | 39.2         | 2.0708      | 0.331           | 49.957   |

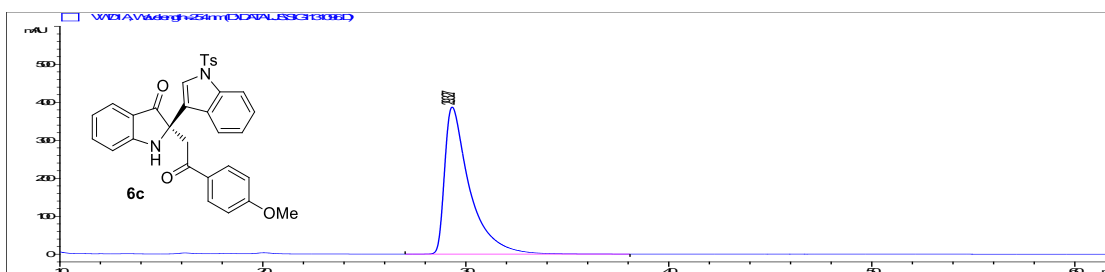

| Peak # | RetTime (min) | Area mAU *s | Height (mAU) | Width (min) | Symmetry Factor | Area (%) |
|--------|---------------|-------------|--------------|-------------|-----------------|----------|
| 1      | 29.327        | 33004.9     | 387.3        | 1.2418      | 0.393           | 100.000  |

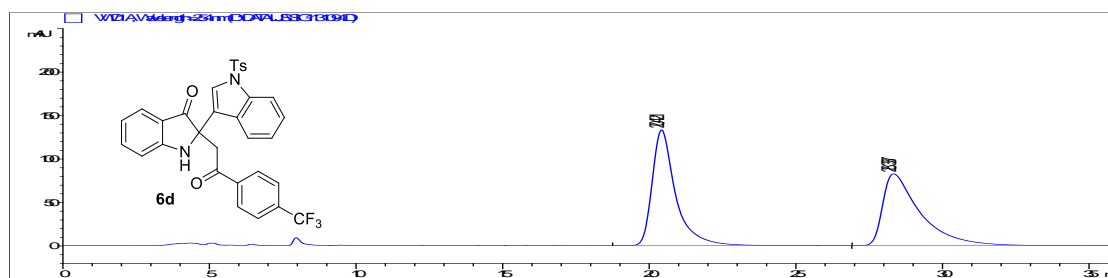

| Peak # | RetTime (min) | Area mAU *s | Height (mAU) | Width (min) | Symmetry Factor | Area (%) |
|--------|---------------|-------------|--------------|-------------|-----------------|----------|
| 1      | 20.421        | 7410.1      | 133          | 0.8304      | 0.606           | 50.090   |
| 2      | 28.337        | 7383.5      | 82.5         | 1.2941      | 0.374           | 49.910   |

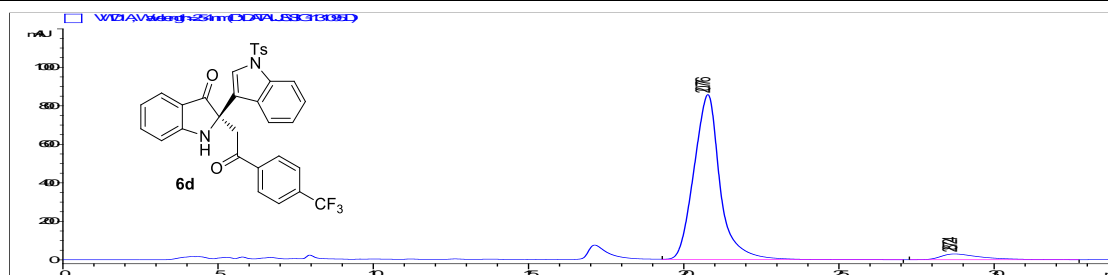

| Peak # | RetTime (min) | Area mAU *s | Height (mAU) | Width (min) | Symmetry Factor | Area (%) |
|--------|---------------|-------------|--------------|-------------|-----------------|----------|
| 1      | 20.776        | 49914.4     | 857.1        | 0.8891      | 1.034           | 94.931   |
| 2      | 28.724        | 2665.5      | 29.6         | 1.2996      | 0.476           | 5.069    |

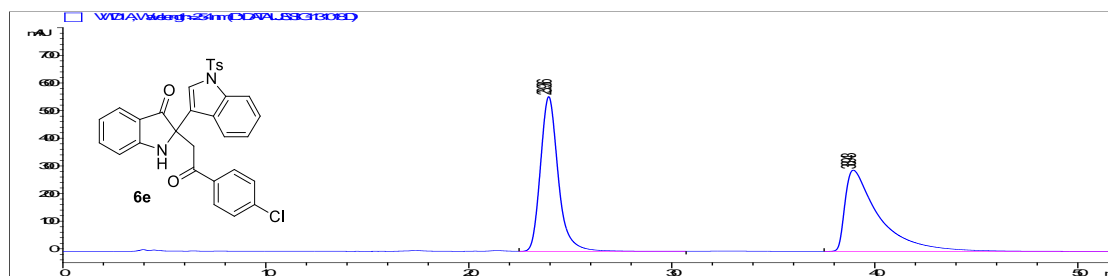

| Peak # | RetTime (min) | Area mAU *s | Height (mAU) | Width (min) | Symmetry Factor | Area (%) |
|--------|---------------|-------------|--------------|-------------|-----------------|----------|
| 1      | 23.936        | 33974.3     | 559.5        | 0.9356      | 0.8             | 49.961   |
| 2      | 38.943        | 34027.9     | 293.7        | 1.637       | 0.292           | 50.039   |

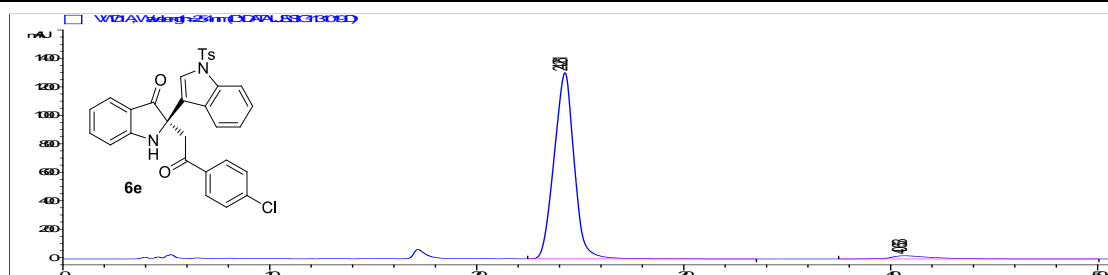

| Peak # | RetTime (min) | Area mAU *s | Height (mAU) | Width (min) | Symmetry Factor | Area (%) |
|--------|---------------|-------------|--------------|-------------|-----------------|----------|
| 1      | 24.261        | 87756.7     | 1307.9       | 1.0216      | 1.101           | 96.507   |
| 2      | 40.653        | 3176.2      | 22.4         | 1.9943      | 0.446           | 3.493    |

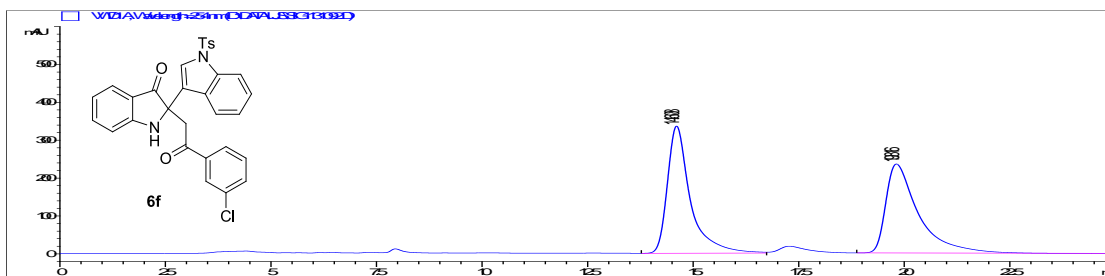

| Peak # | RetTime (min) | Area mAU *s | Height (mAU) | Width (min) | Symmetry Factor | Area (%) |
|--------|---------------|-------------|--------------|-------------|-----------------|----------|
| 1      | 14.608        | 12677.5     | 335.6        | 0.5572      | 0.606           | 50.070   |
| 2      | 19.816        | 12642.2     | 235.1        | 0.7905      | 0.439           | 49.930   |

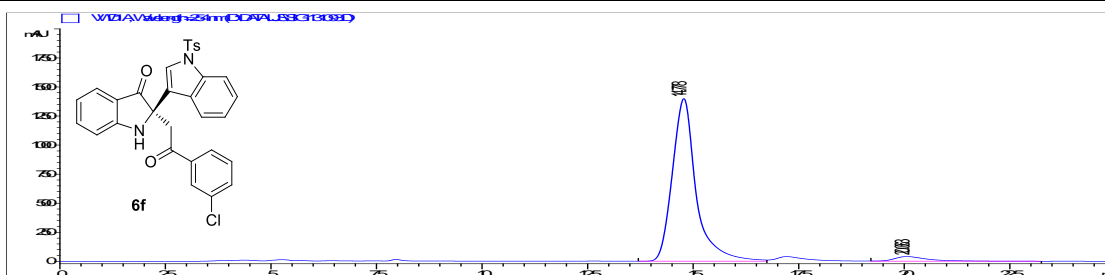

| Peak # | RetTime (min) | Area mAU *s | Height (mAU) | Width (min) | Symmetry Factor | Area (%) |
|--------|---------------|-------------|--------------|-------------|-----------------|----------|
| 1      | 14.778        | 54575.1     | 1398.3       | 0.5893      | 0.838           | 96.051   |
| 2      | 20.063        | 2243.6      | 40.3         | 0.8178      | 0.551           | 3.949    |

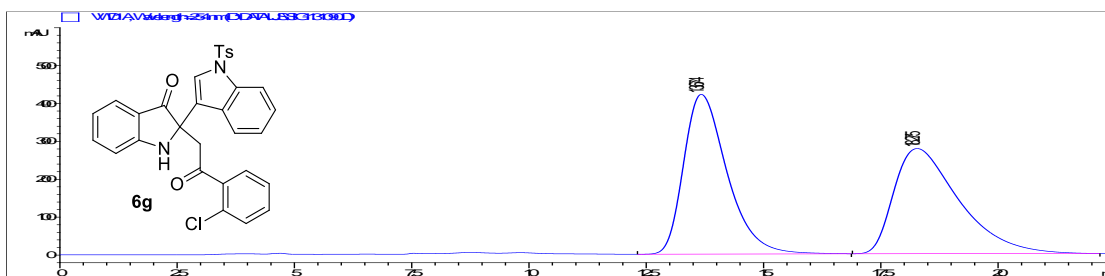

| Peak # | RetTime (min) | Area mAU *s | Height (mAU) | Width (min) | Symmetry Factor | Area (%) |
|--------|---------------|-------------|--------------|-------------|-----------------|----------|
| 1      | 13.674        | 27105.4     | 421.4        | 0.9834      | 0.645           | 50.366   |
| 2      | 18.275        | 26711       | 277.5        | 1.4668      | 0.519           | 49.634   |

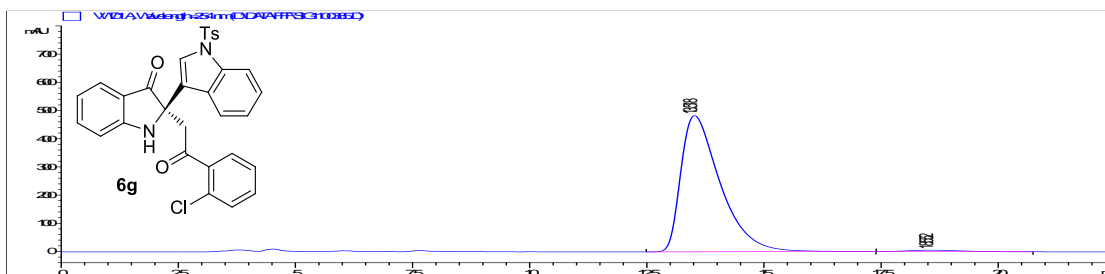

| Peak # | RetTime (min) | Area mAU *s | Height (mAU) | Width (min) | Symmetry Factor | Area (%) |
|--------|---------------|-------------|--------------|-------------|-----------------|----------|
| 1      | 13.518        | 28234.5     | 483.4        | 0.8794      | 0.494           | 98.627   |
| 2      | 18.552        | 393.2       | 5.2          | 0.9823      | 0.705           | 1.373    |

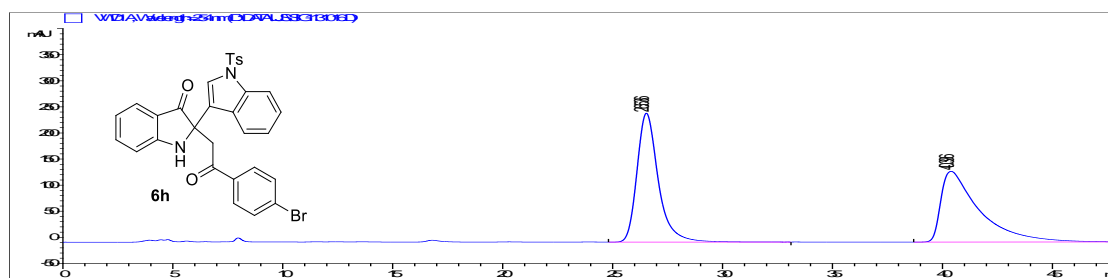

| Peak # | RetTime (min) | Area mAU *s | Height (mAU) | Width (min) | Symmetry Factor | Area (%) |
|--------|---------------|-------------|--------------|-------------|-----------------|----------|
| 1      | 26.536        | 16626.4     | 247          | 1.024       | 0.727           | 50.052   |
| 2      | 40.396        | 16592       | 135.4        | 1.7504      | 0.322           | 49.948   |

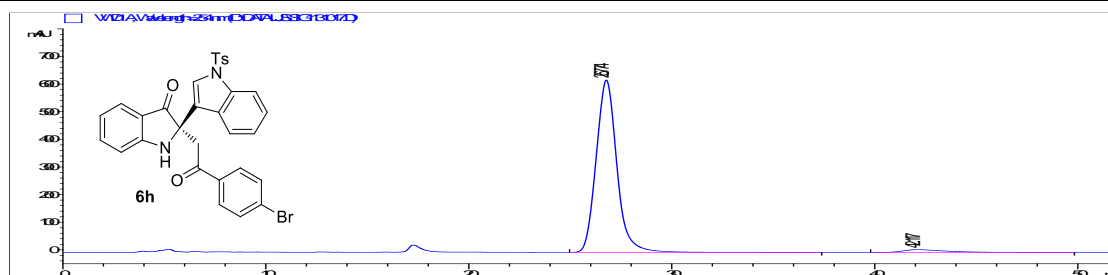

| Peak # | RetTime (min) | Area mAU *s | Height (mAU) | Width (min) | Symmetry Factor | Area (%) |
|--------|---------------|-------------|--------------|-------------|-----------------|----------|
| 1      | 26.774        | 44178.5     | 623.8        | 1.0941      | 0.895           | 96.899   |
| 2      | 42.117        | 1414        | 9.7          | 2.1142      | 0.463           | 3.101    |

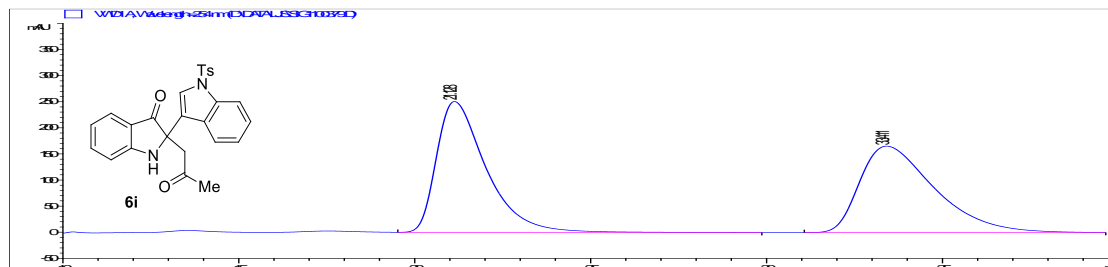

| Peak # | RetTime (min) | Area mAU *s | Height (mAU) | Width (min) | Symmetry Factor | Area (%) |
|--------|---------------|-------------|--------------|-------------|-----------------|----------|
| 1      | 21.128        | 24636.6     | 250.7        | 1.4843      | 0.526           | 50.238   |
| 2      | 33.411        | 24403.6     | 165.5        | 2.2531      | 0.529           | 49.762   |

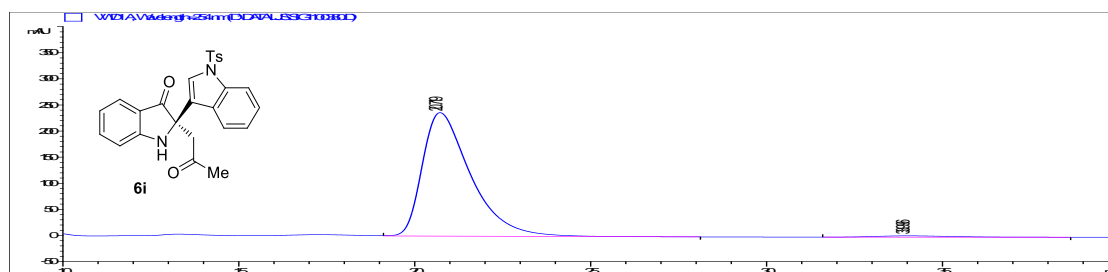

| Peak # | RetTime (min) | Area mAU *s | Height (mAU) | Width (min) | Symmetry Factor | Area (%) |
|--------|---------------|-------------|--------------|-------------|-----------------|----------|
| 1      | 20.719        | 22598.3     | 236.6        | 1.4552      | 0.54            | 98.386   |
| 2      | 33.996        | 370.8       | 2.5          | 1.7358      | 0.68            | 1.614    |

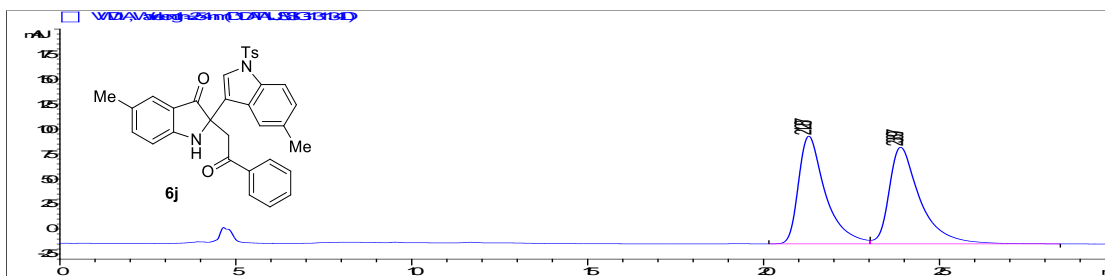

| Peak # | RetTime (min) | Area mAU *s | Height (mAU) | Width (min) | Symmetry Factor | Area (%) |
|--------|---------------|-------------|--------------|-------------|-----------------|----------|
| 1      | 21.287        | 5734        | 107.7        | 0.7929      | 0.572           | 49.203   |
| 2      | 23.897        | 5919.8      | 96.6         | 0.8956      | 0.546           | 50.797   |

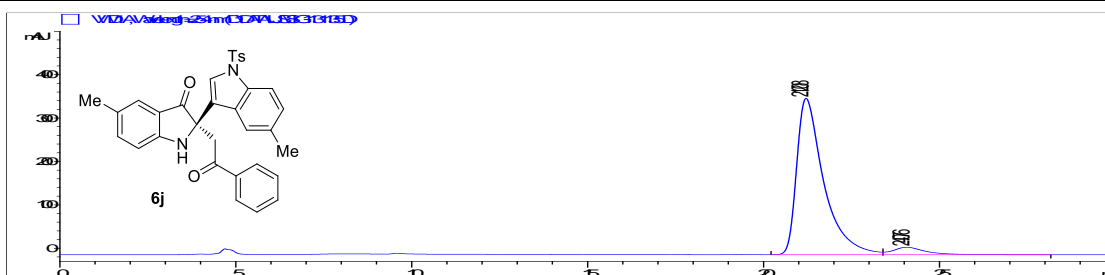

| Peak # | RetTime (min) | Area mAU *s | Height (mAU) | Width (min) | Symmetry Factor | Area (%) |
|--------|---------------|-------------|--------------|-------------|-----------------|----------|
| 1      | 21.208        | 19246.4     | 360.3        | 0.7892      | 0.487           | 94.447   |
| 2      | 24.076        | 1131.7      | 17.1         | 0.9583      | 0.662           | 5.553    |

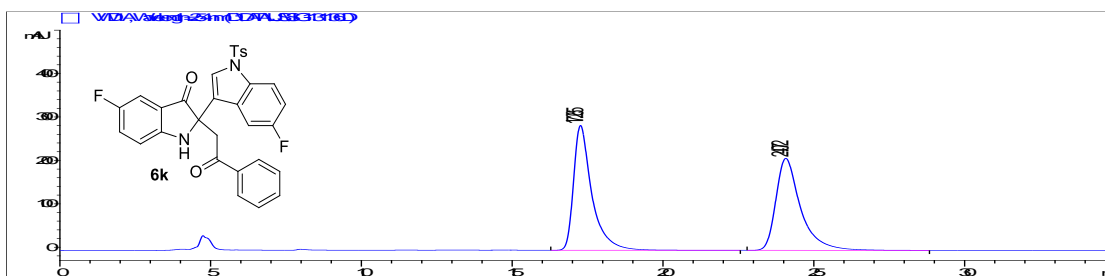

| Peak # | RetTime (min) | Area mAU *s | Height (mAU) | Width (min) | Symmetry Factor | Area (%) |
|--------|---------------|-------------|--------------|-------------|-----------------|----------|
| 1      | 17.265        | 12103.9     | 287.4        | 0.6225      | 0.56            | 50.116   |
| 2      | 24.072        | 12047.8     | 211.8        | 0.8471      | 0.612           | 49.884   |

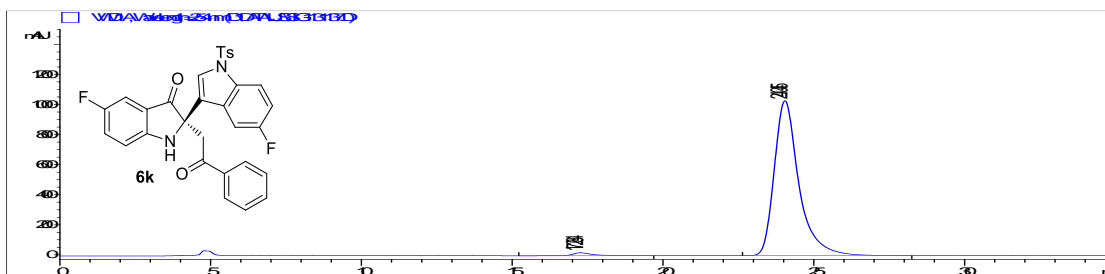

| Peak # | RetTime (min) | Area mAU *s | Height (mAU) | Width (min) | Symmetry Factor | Area (%) |
|--------|---------------|-------------|--------------|-------------|-----------------|----------|
| 1      | 17.264        | 881         | 19.6         | 0.6583      | 0.605           | 1.486    |
| 2      | 24.045        | 58408.4     | 1030.1       | 0.8566      | 0.708           | 98.514   |

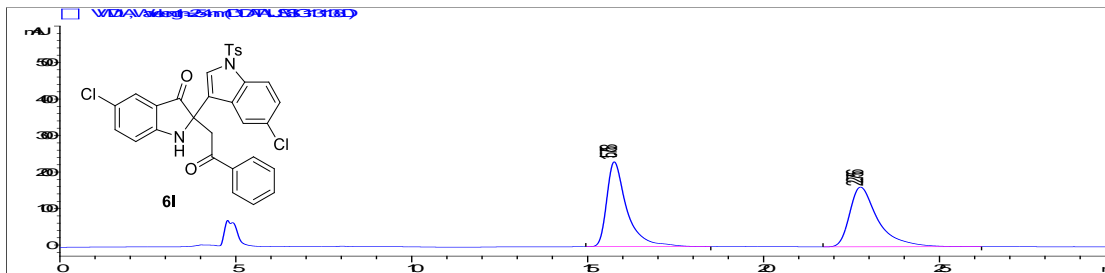

| Peak # | RetTime (min) | Area mAU *s | Height (mAU) | Width (min) | Symmetry Factor | Area (%) |
|--------|---------------|-------------|--------------|-------------|-----------------|----------|
| 1      | 15.758        | 9247.7      | 232.4        | 0.5866      | 0.542           | 50.217   |
| 2      | 22.756        | 9167.9      | 163.7        | 0.8251      | 0.571           | 49.783   |

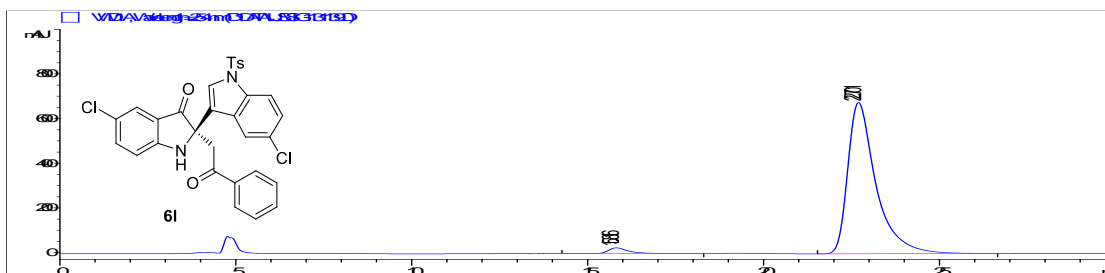

| Peak # | RetTime (min) | Area mAU *s | Height (mAU) | Width (min) | Symmetry Factor | Area (%) |
|--------|---------------|-------------|--------------|-------------|-----------------|----------|
| 1      | 15.816        | 1066.7      | 26           | 0.6042      | 0.617           | 2.755    |
| 2      | 22.701        | 37652.2     | 677.1        | 0.8322      | 0.567           | 97.245   |

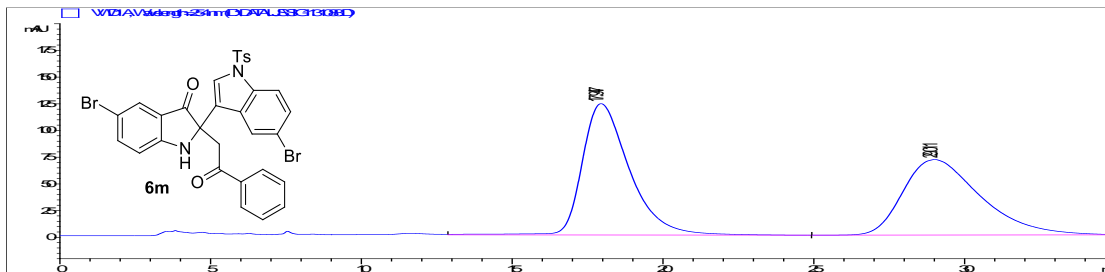

| Peak # | RetTime (min) | Area mAU *s | Height (mAU) | Width (min) | Symmetry Factor | Area (%) |
|--------|---------------|-------------|--------------|-------------|-----------------|----------|
| 1      | 17.947        | 13430.2     | 123          | 1.6471      | 0.636           | 51.486   |
| 2      | 29.011        | 12655.2     | 70.8         | 2.6105      | 0.645           | 48.514   |

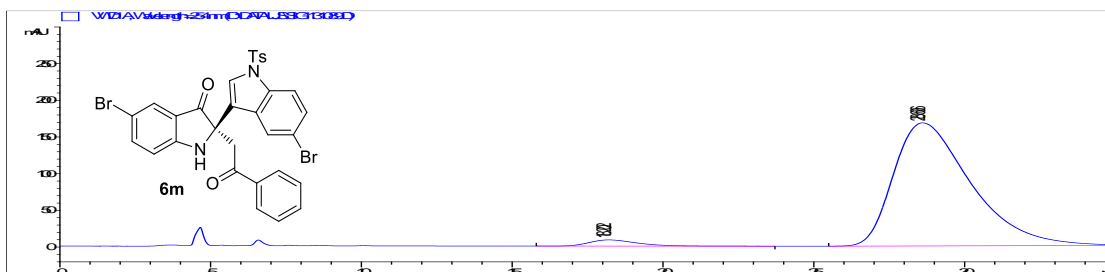

| Peak # | RetTime (min) | Area mAU *s | Height (mAU) | Width (min) | Symmetry Factor | Area (%) |
|--------|---------------|-------------|--------------|-------------|-----------------|----------|
| 1      | 18.202        | 939.1       | 8.5          | 1.6793      | 0.659           | 3.045    |
| 2      | 28.606        | 29903.9     | 167.7        | 2.7558      | 0.562           | 96.955   |

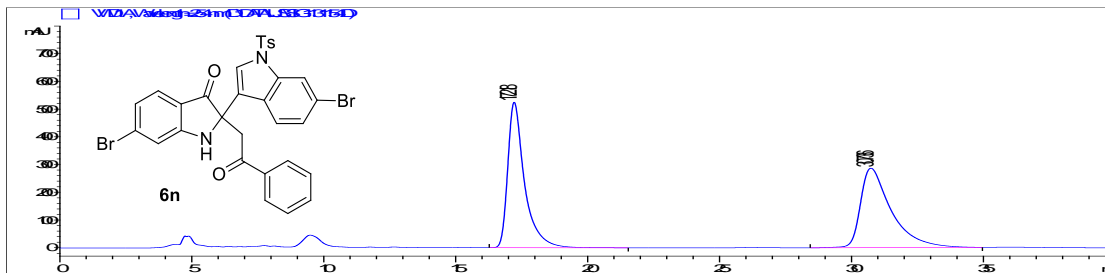

| Peak # | RetTime (min) | Area mAU | *s | Height (mAU) | Width (min) | Symmetry Factor | Area (%) |
|--------|---------------|----------|----|--------------|-------------|-----------------|----------|
| 1      | 17.218        | 23196.8  |    | 525          | 0.6523      | 0.57            | 49.992   |
| 2      | 30.736        | 23204.6  |    | 286.7        | 1.18        | 0.479           | 50.008   |

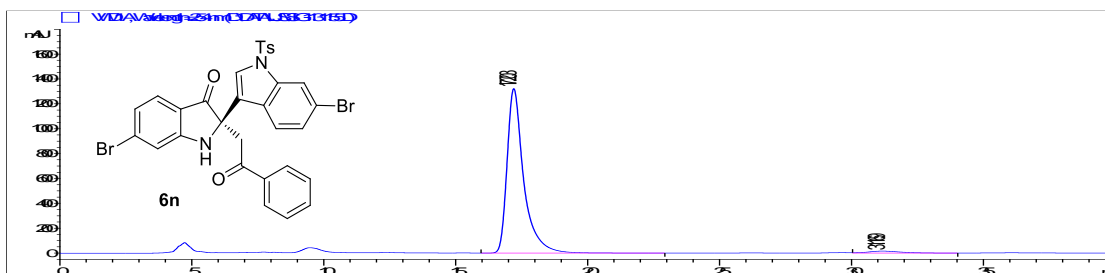

| Peak # | RetTime (min) | Area mAU | *s | Height (mAU) | Width (min) | Symmetry Factor | Area (%) |
|--------|---------------|----------|----|--------------|-------------|-----------------|----------|
| 1      | 17.203        | 57824.7  |    | 1322.4       | 0.6499      | 0.616           | 97.624   |
| 2      | 31.169        | 1407.5   |    | 16.2         | 1.2896      | 0.746           | 2.376    |

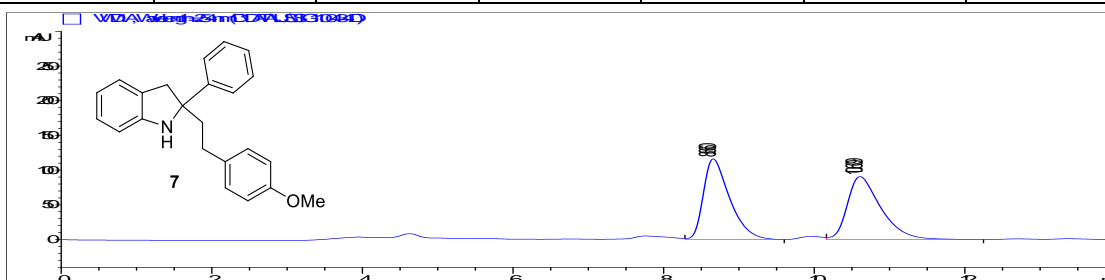

| Peak # | RetTime (min) | Area mAU | *s | Height (mAU) | Width (min) | Symmetry Factor | Area (%) |
|--------|---------------|----------|----|--------------|-------------|-----------------|----------|
| 1      | 8.66          | 2821.5   |    | 116.2        | 0.3649      | 0.565           | 50.092   |
| 2      | 10.609        | 2811.1   |    | 90.7         | 0.4664      | 0.572           | 49.908   |

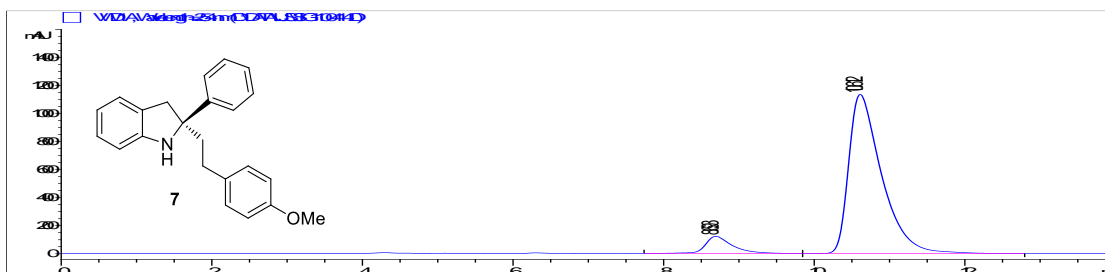

| Peak # | RetTime (min) | Area mAU | *s | Height (mAU) | Width (min) | Symmetry Factor | Area (%) |
|--------|---------------|----------|----|--------------|-------------|-----------------|----------|
| 1      | 8.693         | 3111.4   |    | 122.4        | 0.3693      | 0.622           | 8.296    |
| 2      | 10.612        | 34394.5  |    | 1134.2       | 0.4528      | 0.501           | 91.704   |



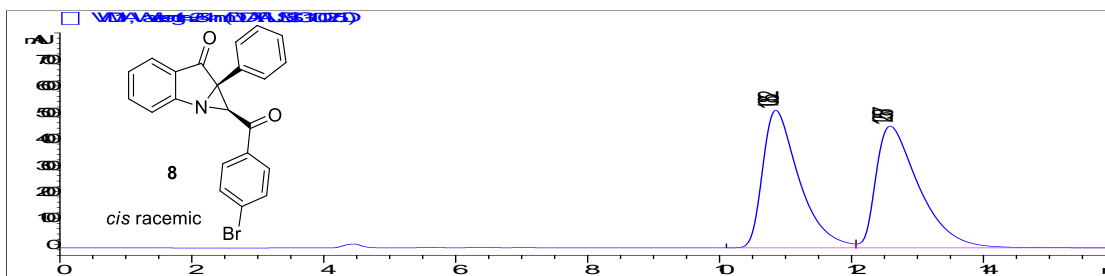

| Peak # | RetTime (min) | Area mAU *s | Height (mAU) | Width (min) | Symmetry Factor | Area (%) |
|--------|---------------|-------------|--------------|-------------|-----------------|----------|
| 1      | 10.852        | 19992.3     | 519.7        | 0.5769      | 0.522           | 48.872   |
| 2      | 12.587        | 20915.5     | 460.1        | 0.6876      | 0.458           | 51.128   |

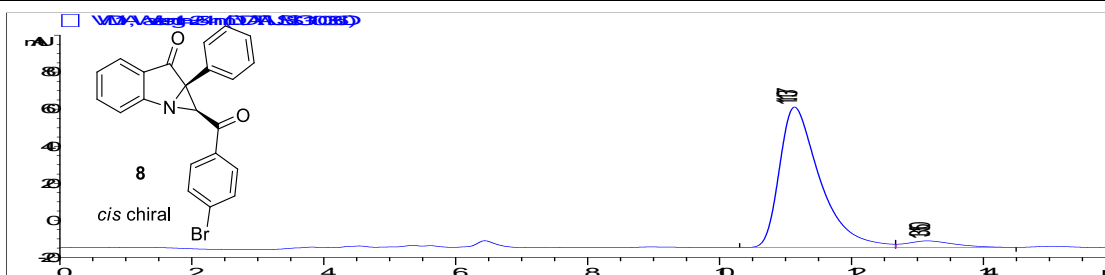

| Peak # | RetTime (min) | Area mAU *s | Height (mAU) | Width (min) | Symmetry Factor | Area (%) |
|--------|---------------|-------------|--------------|-------------|-----------------|----------|
| 1      | 11.137        | 3227.6      | 75.8         | 0.6336      | 0.55            | 94.878   |
| 2      | 13.15         | 174.2       | 3.5          | 0.6884      | 0.734           | 5.122    |

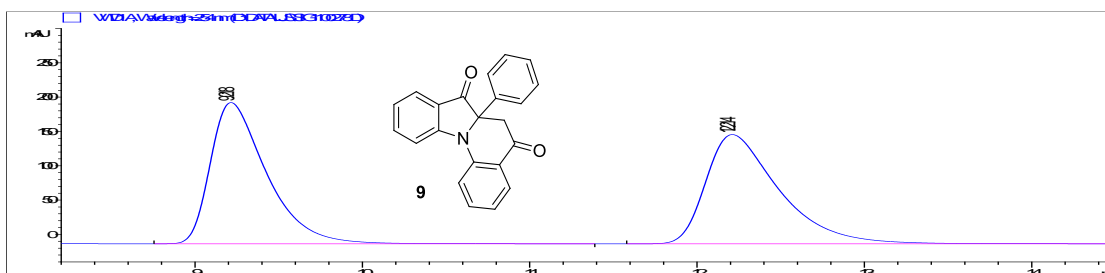

| Peak # | RetTime (min) | Area mAU *s | Height (mAU) | Width (min) | Symmetry Factor | Area (%) |
|--------|---------------|-------------|--------------|-------------|-----------------|----------|
| 1      | 9.217         | 4817.1      | 205.7        | 0.3518      | 0.538           | 49.795   |
| 2      | 12.214        | 4856.8      | 159.2        | 0.455       | 0.528           | 50.205   |

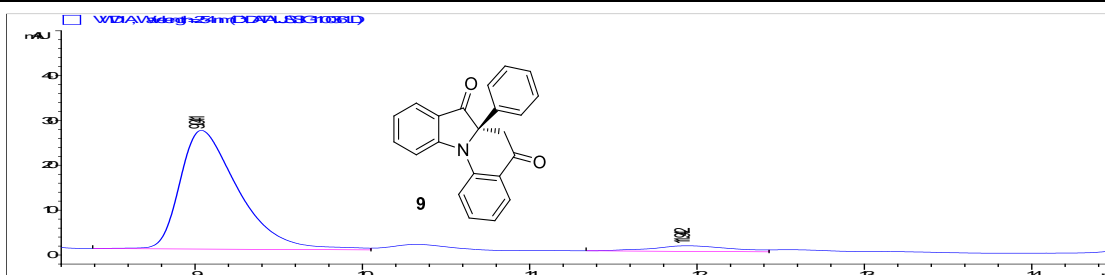

| Peak # | RetTime (min) | Area mAU *s | Height (mAU) | Width (min) | Symmetry Factor | Area (%) |
|--------|---------------|-------------|--------------|-------------|-----------------|----------|
| 1      | 9.041         | 642.4       | 26.5         | 0.3706      | 0.544           | 93.954   |
| 2      | 11.942        | 41.3        | 1.3          | 0.475       | 0.793           | 6.046    |

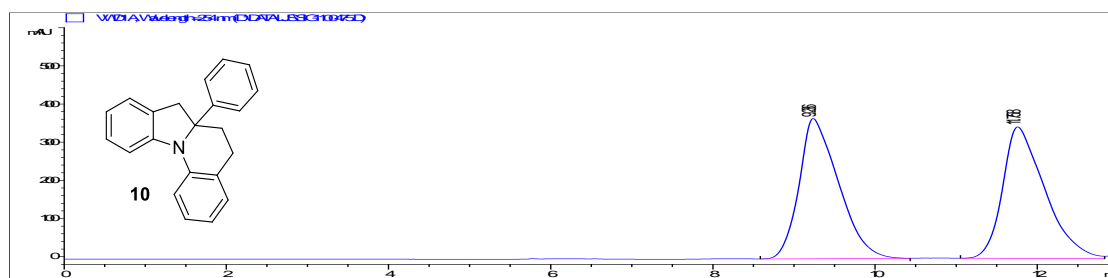

| Peak # | RetTime (min) | Area mAU *s | Height (mAU) | Width (min) | Symmetry Factor | Area (%) |
|--------|---------------|-------------|--------------|-------------|-----------------|----------|
| 1      | 9.041         | 642.4       | 26.5         | 0.3706      | 0.544           | 93.954   |
| 2      | 11.942        | 41.3        | 1.3          | 0.475       | 0.793           | 6.046    |

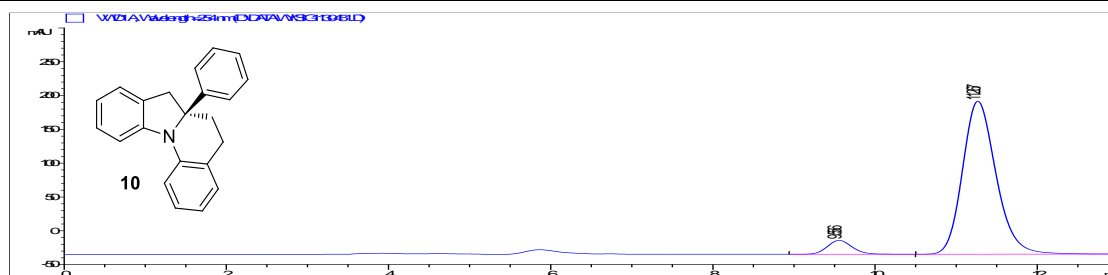

| Peak # | RetTime (min) | Area mAU *s | Height (mAU) | Width (min) | Symmetry Factor | Area (%) |
|--------|---------------|-------------|--------------|-------------|-----------------|----------|
| 1      | 9.556         | 433.9       | 20.4         | 0.3293      | 0.863           | 6.272    |
| 2      | 11.267        | 6484.9      | 226.2        | 0.4451      | 0.796           | 93.728   |

## X-Ray crystallographic data

The X-ray crystallographic structures for **3n**. ORTEP representation with 50% probability thermal ellipsoids. Crystal data have been deposited to CCDC, number 1852757.

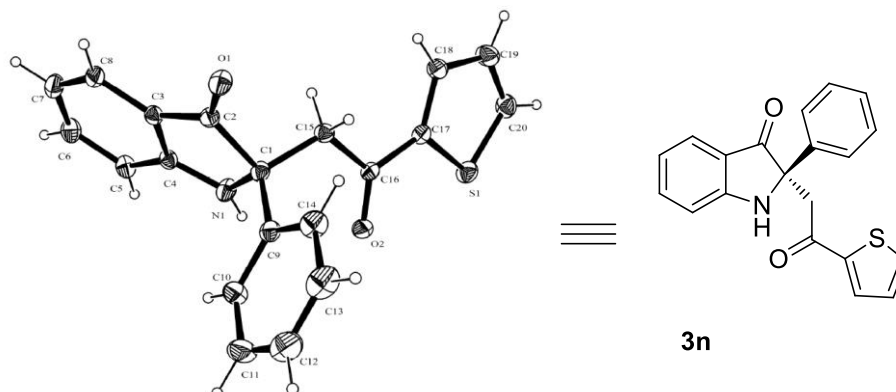

|                                   |                                                                                                                    |
|-----------------------------------|--------------------------------------------------------------------------------------------------------------------|
| Empirical formula                 | C <sub>20</sub> H <sub>15</sub> NO <sub>2</sub> S.DMSO                                                             |
| Identification code               | chq_0629                                                                                                           |
| Formula weight                    | 411.52                                                                                                             |
| Temperature                       | 293(2) K                                                                                                           |
| Wavelength                        | 1.54184 Å                                                                                                          |
| Crystal system, space group       | Orthorhombic, P <sub>2</sub> <sub>1</sub> <sub>2</sub> <sub>1</sub> <sub>2</sub> <sub>1</sub>                      |
| Unit cell dimensions              | a = 7.94450(9) Å    alpha = 90 deg.<br>b = 10.19612(12) Å    beta = 90 deg.<br>c = 25.8377(2) Å    gamma = 90 deg. |
| Volume                            | 2092.94(4) Å <sup>3</sup>                                                                                          |
| Z, Calculated density             | 4, 1.306 Mg/m <sup>3</sup>                                                                                         |
| Absorption coefficient            | 2.488 mm <sup>-1</sup>                                                                                             |
| F (000)                           | 864                                                                                                                |
| Crystal size                      | 0.12 x 0.1 x 0.08 mm <sup>3</sup>                                                                                  |
| Theta range for data collection   | 3.421 to 66.592 deg.                                                                                               |
| Limiting indices                  | -9<=h<=9, -12<=k<=12, -30<=l<=30                                                                                   |
| Reflections collected / unique    | 43576/ 3709 [R(int) = 0.0293]                                                                                      |
| Completeness to theta = 66.592    | 100.0 %                                                                                                            |
| Max. and min. transmission        | 1.00000 and 0.86200                                                                                                |
| Absorption correction             | Semi-empirical from equivalents                                                                                    |
| Refinement method                 | Full-matrix least-squares on F <sup>2</sup>                                                                        |
| Data / restraints / parameters    | 3709 / 0 / 255                                                                                                     |
| Goodness-of-fit on F <sup>2</sup> | 1.078                                                                                                              |
| Final R indices [I>2sigma(I)]     | R <sub>1</sub> = 0.0327, wR <sub>2</sub> = 0.0896                                                                  |
| R indices (all data)              | R <sub>1</sub> = 0.0337, wR <sub>2</sub> = 0.0905                                                                  |
| Absolute structure parameter      | 0.002(4)                                                                                                           |
| Extinction coefficient            | n/a                                                                                                                |
| Largest diff. peak and hole       | 0.211 and -0.349 e.Å <sup>-3</sup>                                                                                 |

The X-ray crystallographic structures for **8**. ORTEP representation with 50% probability thermal ellipsoids. Solvent is omitted for clarity. Crystal data have been deposited to CCDC, number 1819537.

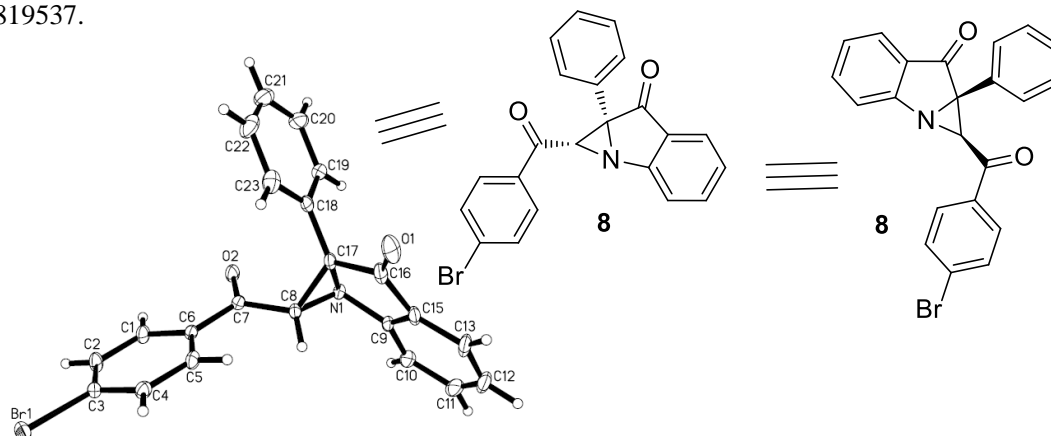

|                                   |                                                                                                                                          |
|-----------------------------------|------------------------------------------------------------------------------------------------------------------------------------------|
| Empirical formula                 | $C_{22}H_{14}BrNO_2 \cdot CHCl_3$                                                                                                        |
| Identification code               | b                                                                                                                                        |
| Formula weight                    | 523.61                                                                                                                                   |
| Temperature                       | 296(2) K                                                                                                                                 |
| Wavelength                        | 0.71073 Å                                                                                                                                |
| Crystal system, space group       | Triclinic, P -1                                                                                                                          |
| Unit cell dimensions              | a = 9.9551(9) Å      alpha = 102.790(2) deg.<br>b = 10.2283(9) Å    beta = 98.700(2) deg.<br>c = 11.7216(9) Å    gamma = 103.152(2) deg. |
| Volume                            | 1107.55(16) Å <sup>3</sup>                                                                                                               |
| Z, Calculated density             | 2, 1.570 Mg/m <sup>3</sup>                                                                                                               |
| Absorption coefficient            | 2.238 mm <sup>-1</sup>                                                                                                                   |
| F (000)                           | 524                                                                                                                                      |
| Crystal size                      | 0.45 x 0.34 x 0.24 mm <sup>3</sup>                                                                                                       |
| Theta range for data collection   | 2.40 to 25.00 deg.                                                                                                                       |
| Limiting indices                  | -11 ≤ h ≤ 11, -12 ≤ k ≤ 12, -13 ≤ l ≤ 13                                                                                                 |
| Reflections collected / unique    | 19987 / 3879 [R(int) = 0.0469]                                                                                                           |
| Completeness to theta = 25.00     | 99.6 %                                                                                                                                   |
| Refinement method                 | Full-matrix least-squares on F <sup>2</sup>                                                                                              |
| Data / restraints / parameters    | 3879 / 0 / 271                                                                                                                           |
| Goodness-of-fit on F <sup>2</sup> | 0.931                                                                                                                                    |
| Final R indices [I > 2σ(I)]       | R <sub>1</sub> = 0.0380, wR <sub>2</sub> = 0.1136                                                                                        |
| R indices (all data)              | R <sub>1</sub> = 0.0509, wR <sub>2</sub> = 0.1217                                                                                        |
| Extinction coefficient            | n/a                                                                                                                                      |
| Largest diff. peak and hole       | 0.565 and -0.526 e.Å <sup>-3</sup>                                                                                                       |
